# Supplementary material for: Deconstructive isomerization of azetidinols via C–C bond cleavage enabled by N-heterocyclic carbene (NHC) catalysis
Source: Royal Society of Chemistry journal article supplement (doi:10.1039/d2cc03104c), 2022-01-01

## Deconstructive Isomerization of Azetidinols *via* C-C Bond Cleavage

### Enabled by *N*-Heterocyclic Carbene (NHC) Catalysis

Zhen Wang, Xue Chen, Yunayuan Hu,\* Huiling, Li, Yunfang Yang,\* Yunkui Liu, Hongwei Jin, and Bingwei Zhou\*

College of Chemical Engineering, Zhejiang University of Technology, Hangzhou, 310014, P. R. of China. E-mail: [hyy0907@zjut.edu.cn](mailto:hyy0907@zjut.edu.cn); [yangyf@zjut.edu.cn](mailto:yangyf@zjut.edu.cn); [zhoubw@zjut.edu.cn](mailto:zhoubw@zjut.edu.cn)

### Table of Contents

|                                                              |     |
|--------------------------------------------------------------|-----|
| 1. General Information                                       | S2  |
| 2. Preparation of Substrates                                 | S3  |
| 3. NHC-Catalyzed Deconstructive Isomerization of Azetidinols | S10 |
| 3.1 Optimization of reaction conditions                      | S10 |
| 3.2 Experimental details and characterization of products    | S11 |
| 3.3 One-pot synthesis of oxazol-2-ones from azetidinols      | S21 |
| 4. Mechanistic studies                                       | S23 |
| 4.1 Radical trapping experiments                             | S23 |
| 4.2 Deconstructive isomerization of <b>1B</b>                | S24 |
| 4.3 Deuterium experiment                                     | S24 |
| 4.4 Stoichiometric experiment                                | S25 |
| 4.5 Density functional theory (DFT) calculations             | S27 |
| 5. Synthetic Applications                                    | S29 |
| 5.1 Gram-scale synthesis                                     | S29 |
| 5.2 Transformation of $\alpha$ -amino ketone <b>2</b>        | S29 |
| 6. References                                                | S31 |
| 7. $^1\text{H}$ and $^{13}\text{C}$ NMR Spectra              | S32 |

## 1. General Information

Unless otherwise noted, all reactions were carried out in flame-dried reaction vessels with Teflon screw caps under nitrogen. Solvents were purified and dried according to standard methods prior to use. All commercially available reagents were obtained from chemical suppliers and used after proper purification if necessary. Flash column chromatography was performed on silica gel (200-300 mesh) with the indicated solvent mixtures. TLC analysis was performed on pre-coated, glass-backed silica gel plates and visualized with UV light.

The  $^1\text{H}$  NMR and  $^{13}\text{C}$  NMR spectra were recorded on a Bruker 400 AV or 500 AV spectrometers. Chemical shifts ( $\delta$ ) were reported as parts per million (ppm) downfield from tetramethylsilane and the following abbreviations were used to identify the multiplicities: s = singlet, d = doublet, t = triplet, q = quartet, m = multiplet, dd = doublet of doublets, dt = doublet of triplets, dq = doublet of quartets, br = broad and all combinations thereof can be explained by their integral parts. Coupling constant ( $J$ ) was reported in hertz unit (Hz). The high resolution mass spectra (HRMS) were recorded on an Agilent 6210 LC/TOF spectrometer.

## 2. Preparation of Substrates

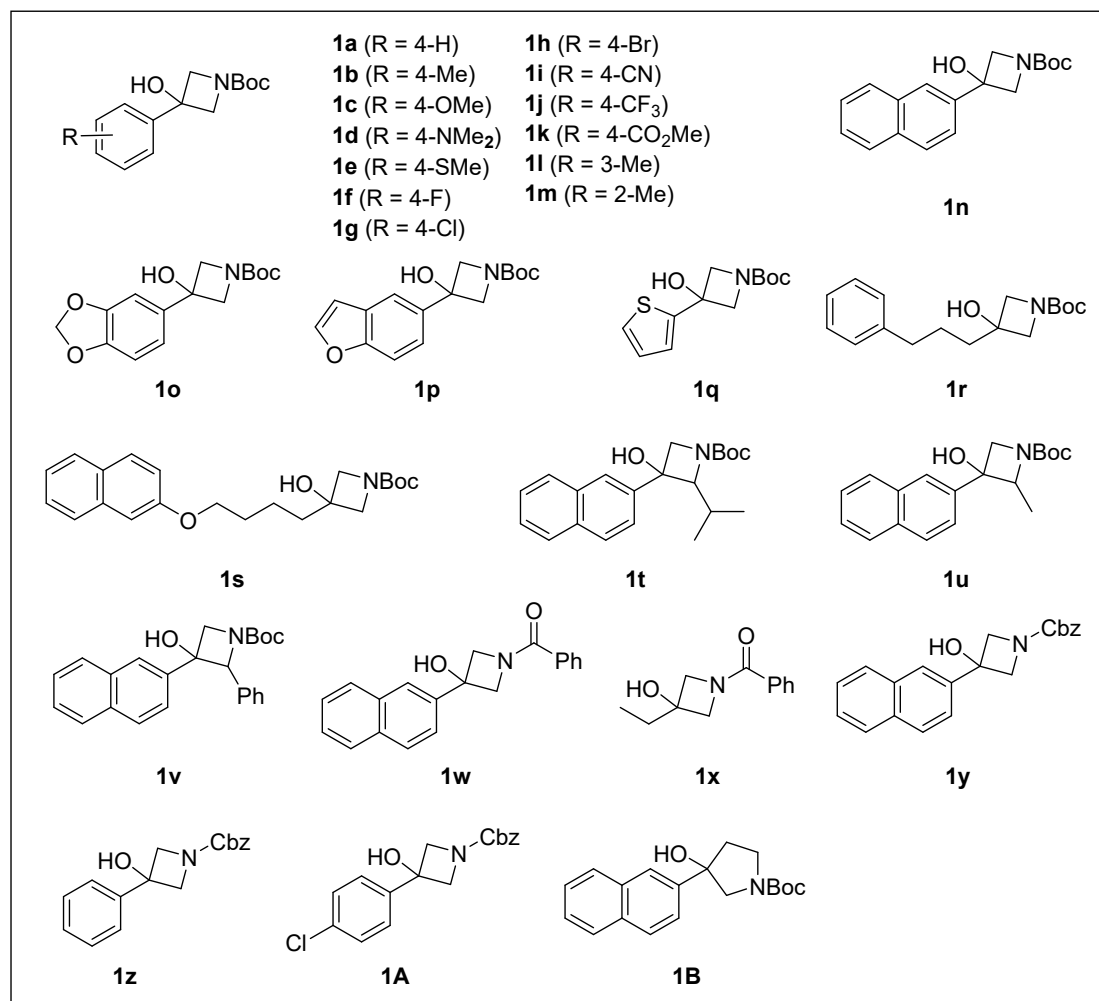

*General procedure*<sup>[1]</sup>: 3-Azetidinone (5 mmol) was dissolved in 10 mL of dried THF in 50 mL Schlenk tube under N<sub>2</sub>. Grignard reagent (1.1 equiv) was added dropwise with stirring under ice bath. Then it was allowed to warm to room temperature and stirred overnight. After completion, the mixture was quenched with NH<sub>4</sub>Cl (aq.). The aqueous layer was extracted with ethyl acetate (3×20 mL). The combined organic layers were dried over anhydrous Na<sub>2</sub>SO<sub>4</sub>, filtered, and concentrated under reduced pressure. After removal of the solvent in vacuo, the crude mixture was purified by flash column chromatography on silica gel to give the desired azetidinols. All the azetidinols were synthesized according to this general procedure. **1y** were synthesized from N-Boc-3-pyrrolidinone according to this procedure. Substrates **1a**<sup>1</sup>, **1c**<sup>1</sup>, **1d**<sup>2</sup>, **1f**<sup>1</sup>, **1g**<sup>1</sup>, **1h**<sup>1</sup>, **1j**<sup>1</sup>, **1m**<sup>3</sup>, **1q**<sup>1</sup>, **1B**<sup>4</sup> were prepared according to the general procedure and their structural

characterization were in line with previous literature.

***tert*-butyl 3-hydroxy-3-(*p*-tolyl)azetidine-1-carboxylate (1b)**

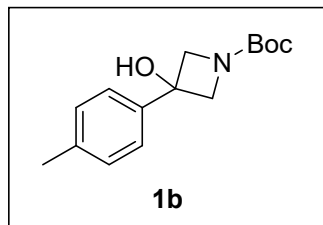

**<sup>1</sup>H NMR (500 MHz, CDCl<sub>3</sub>)** δ 7.36 (d, *J* = 8.2 Hz, 2H), 7.18 (d, *J* = 8.0 Hz, 2H), δ 4.19 (d, *J* = 9.1 Hz, 1H), 4.14 (d, *J* = 9.2 Hz, 1H), 4.09 (s, 1H), 2.35 (s, 3H), 1.45 (s, 9H). **<sup>13</sup>C NMR (125 MHz, CDCl<sub>3</sub>)** δ 156.5, 140.5, 137.2, 129.1, 124.5, 79.8, 70.9, 64.2, 28.3, 20.9. **HRMS(ESI)**

Calculated for C<sub>14</sub>H<sub>20</sub>O<sub>3</sub>N<sup>-</sup> ([M-H]<sup>-</sup>): 262.1449, found: 262.1447.

***tert*-butyl 3-hydroxy-3-(4-(methylthio)phenyl)azetidine-1-carboxylate (1e)**

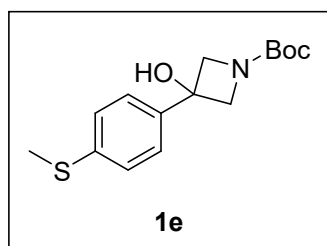

**<sup>1</sup>H NMR (500 MHz, CDCl<sub>3</sub>)** δ 7.38 (d, *J* = 8.4 Hz, 2H), 7.22 (d, *J* = 8.4 Hz, 2H), 4.34 (s, 1H), 4.13 (s, 4H), 2.46 (s, 3H), 1.43 (s, 9H). **<sup>13</sup>C NMR (125 MHz, CDCl<sub>3</sub>)** δ 156.4, 140.4, 137.8, 126.5, 125.1, 78.0, 70.6, 64.3, 28.3, 15.7. **HRMS(ESI)** Calculated for C<sub>15</sub>H<sub>20</sub>O<sub>3</sub>NS<sup>-</sup> ([M-H]<sup>-</sup>):

294.1169, found: 294.1172.

***tert*-butyl 3-(4-cyanophenyl)-3-hydroxyazetidine-1-carboxylate (1i)**

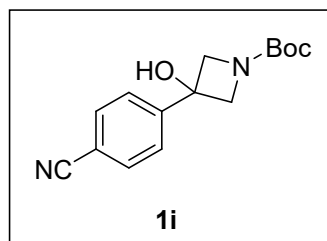

**<sup>1</sup>H NMR (500 MHz, CDCl<sub>3</sub>)** δ 7.67–7.59 (m, 4H), 4.96 (s, 1H), 4.17 (d, *J* = 9.4 Hz, 2H), 4.08 (d, *J* = 9.4 Hz, 2H), 1.39 (s, 9H). **<sup>13</sup>C NMR (125 MHz, CDCl<sub>3</sub>)** δ 156.4, 149.2, 132.1, 125.3, 118.5, 111.0, 80.4, 70.1, 64.7, 28.2.

**HRMS(ESI)** Calculated for C<sub>15</sub>H<sub>17</sub>O<sub>3</sub>N<sub>2</sub><sup>-</sup> ([M-H]<sup>-</sup>):

273.1245, found: 273.1238.

***tert*-butyl 3-hydroxy-3-(4-(methoxycarbonyl)phenyl)azetidine-1-carboxylate (1k)**

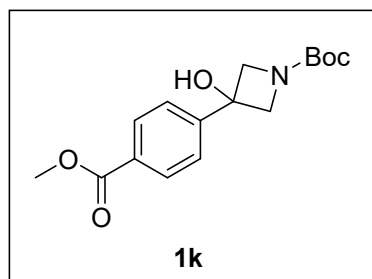

**<sup>1</sup>H NMR (500 MHz, CDCl<sub>3</sub>)** δ 7.98 (d, *J* = 8.4 Hz, 2H), 7.56 (d, *J* = 8.4 Hz, 2H), 4.70 (s, 1H), δ 4.18 (d, *J* = 9.3

Hz, 1H), 4.14 (d,  $J = 9.2$  Hz, 1H), 3.88 (s, 3H), 1.42 (s, 9H).  **$^{13}\text{C}$  NMR (125 MHz,  $\text{CDCl}_3$ )**  $\delta$  166.8, 156.5, 148.8, 129.7, 129.2, 124.5, 80.2, 70.5, 64.7, 52.1, 28.3. **HRMS(ESI)** Calculated for  $\text{C}_{16}\text{H}_{20}\text{O}_5\text{N}^-$  ( $[\text{M}-\text{H}]^-$ ): 306.1341, found: 306.1350.

***tert*-butyl 3-hydroxy-3-(*m*-tolyl)azetidine-1-carboxylate (1l)**

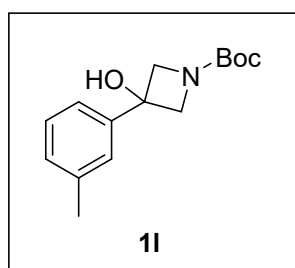

**$^1\text{H}$  NMR (500 MHz,  $\text{CDCl}_3$ )**  $\delta$  7.33–7.24 (m, 3H), 7.16–7.08 (m, 1H),  $\delta$  4.21 (d,  $J = 9.2$  Hz, 1H), 4.15 (d,  $J = 9.2$  Hz, 1H), 4.04 (s, 1H), 2.37 (s, 3H), 1.46 (s, 9H).  **$^{13}\text{C}$  NMR (125 MHz,  $\text{CDCl}_3$ )**  $\delta$  156.5, 143.4, 138.1, 128.4, 128.3, 125.3, 121.6, 79.9, 71.0, 64.2, 28.3, 21.4. **HRMS(ESI)** Calculated

for  $\text{C}_{14}\text{H}_{20}\text{O}_3\text{N}^-$  ( $[\text{M}-\text{H}]^-$ ): 262.1449, found: 262.1447.

***tert*-butyl 3-hydroxy-3-(naphthalen-2-yl)azetidine-1-carboxylate (1n)**

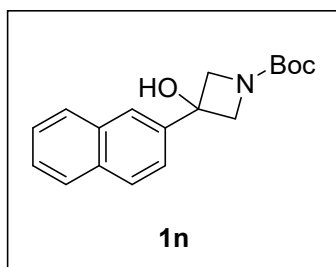

**$^1\text{H}$  NMR (500 MHz,  $\text{CDCl}_3$ )**  $\delta$  7.92 (s, 1H), 7.86–7.78 (m, 3H), 7.56 (dd,  $J_1 = 8.6$ ,  $J_2 = 1.8$  Hz, 1H), 7.52–7.45 (m, 2H), 4.36–4.22 (m, 5H), 1.48 (s, 9H).  **$^{13}\text{C}$  NMR (125 MHz,  $\text{CDCl}_3$ )**  $\delta$  156.5, 140.6, 132.9, 132.6, 128.5, 128.1, 127.5, 126.3, 126.1, 123.2, 122.8, 80.0, 71.0, 64.1, 28.3.

**HRMS(ESI)** Calculated for  $\text{C}_{18}\text{H}_{20}\text{O}_3\text{N}^-$  ( $[\text{M}-\text{H}]^-$ ): 298.1449, found: 298.1450.

***tert*-butyl 3-(benzo[d][1,3]dioxol-5-yl)-3-hydroxyazetidine-1-carboxylate (1o)**

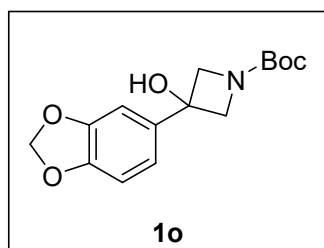

**$^1\text{H}$  NMR (500 MHz,  $\text{CDCl}_3$ )**  $\delta$  7.00–6.89 (m, 2H), 6.77 (d,  $J = 8.0$  Hz, 1H), 5.93 (s, 2H), 4.16–4.08 (m, 5H), 1.43 (s, 9H).  **$^{13}\text{C}$  NMR (125 MHz,  $\text{CDCl}_3$ )**  $\delta$  156.5, 147.8, 146.9, 137.6, 117.9, 107.9, 105.6, 101.0, 79.9, 70.9, 64.4, 28.3.

**HRMS(ESI)** Calculated for  $\text{C}_{15}\text{H}_{18}\text{O}_5\text{N}^-$  ( $[\text{M}-\text{H}]^-$ ):

292.1190, found: 292.1191.

***tert*-butyl 3-(benzofuran-5-yl)-3-hydroxyazetidine-1-carboxylate (1p)**

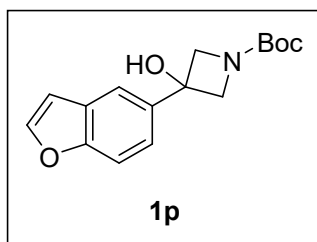

**<sup>1</sup>H NMR (500 MHz, CDCl<sub>3</sub>)** δ 7.70 (d, *J* = 1.7 Hz, 1H), 7.63 (d, *J* = 2.2 Hz, 1H), 7.47 (d, *J* = 8.6 Hz, 1H), 7.39 (dd, *J*<sub>1</sub> = 8.6, *J*<sub>2</sub> = 1.9 Hz, 1H), 6.77–6.71 (m, 1H), δ 4.26 (d, *J* = 9.2 Hz, 1H), 4.20 (d, *J* = 9.2 Hz, 1H), 4.17 (s, 1H), 1.44 (s, 9H). **<sup>13</sup>C NMR (125 MHz, CDCl<sub>3</sub>)** δ 156.6, 154.3, 145.7, 138.3, 127.4, 121.3, 117.5, 111.4, 106.7, 80.0, 71.3, 64.6, 28.4. **HRMS(ESI)** Calculated for C<sub>16</sub>H<sub>18</sub>O<sub>4</sub>N<sup>-</sup> ([M-H]<sup>-</sup>): 288.1241, found: 288.1245.

***tert*-butyl 3-hydroxy-3-(3-phenylpropyl)azetidine-1-carboxylate (1r)**

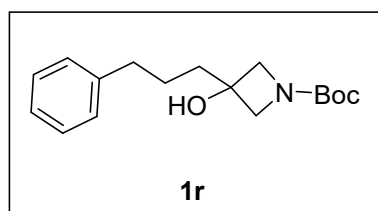

**<sup>1</sup>H NMR (500 MHz, CDCl<sub>3</sub>)** δ 7.29 (t, *J* = 7.6 Hz, 2H), 7.23–7.18 (m, 3H), 3.89–3.67 (m, 4H), 3.54 (s, 1H), 2.66 (dd, *J*<sub>1</sub> = 6.6 Hz, *J*<sub>2</sub> = 3.6 Hz, 2H), 1.75 (d, *J* = 3.6 Hz, 4H), 1.44 (s, 9H). **<sup>13</sup>C NMR (125 MHz, CDCl<sub>3</sub>)** δ 156.5, 141.9, 128.3, 128.3, 125.8, 79.6, 70.1, 61.9, 38.3, 35.7, 28.3, 25.0. **HRMS(ESI)** Calculated for C<sub>17</sub>H<sub>24</sub>O<sub>3</sub>N<sup>-</sup> ([M-H]<sup>-</sup>): 290.1762, found: 290.1764.

***tert*-butyl 3-hydroxy-3-(4-(naphthalen-2-yloxy)butyl)azetidine-1-carboxylate (1s)**

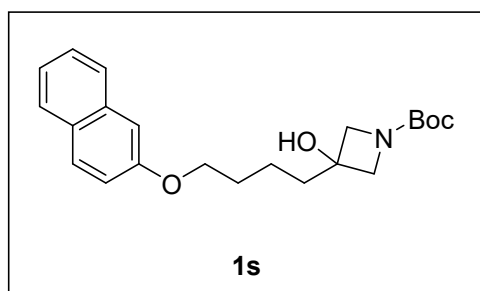

**<sup>1</sup>H NMR (500 MHz, CDCl<sub>3</sub>)** δ 7.81–7.70 (m, 3H), 7.50–7.40 (m, 1H), 7.38–7.31 (m, 1H), 7.21–7.10 (m, 2H), 4.11–4.03 (m, 2H), 3.92–3.79 (m, 4H), 3.73–3.47 (m, 1H), 1.98–1.85 (m, 2H), 1.85–1.77 (m, 2H), 1.67–1.54 (m, 2H), 1.46 (s, 9H). **<sup>13</sup>C NMR (125 MHz, CDCl<sub>3</sub>)** δ 156.8, 156.5, 134.5, 129.3, 129.2, 128.8, 127.5, 126.6, 126.2, 126.2, 123.4, 123.4, 118.9, 118.8, 106.6, 79.7, 70.2, 67.6, 62.0, 38.5, 29.2, 28.3, 20.1. **HRMS(ESI)** Calculated for C<sub>22</sub>H<sub>29</sub>O<sub>4</sub>NNa<sup>+</sup> ([M+Na]<sup>+</sup>): 394.1994, found: 394.1984.

***tert*-butyl 3-hydroxy-2-isopropyl-3-(naphthalen-2-yl)azetidine-1-carboxylate (1t)**

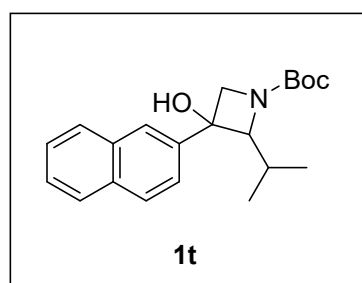

**<sup>1</sup>H NMR (500 MHz, CDCl<sub>3</sub>)** δ 7.93 (d, *J* = 1.4 Hz, 1H),

7.91–7.81 (m, 3H), 7.55 (dd,  $J_1 = 8.6$ ,  $J_2 = 1.9$  Hz, 1H), 7.53–7.47 (m, 2H), 4.41 (d,  $J = 9.9$  Hz, 1H), 4.17–4.04 (m, 2H), 2.98 (s, 1H), 2.47–2.31 (m, 1H), 1.49 (s, 9H), 1.11 (d,  $J = 6.8$  Hz, 3H), 1.01 (d,  $J = 6.6$  Hz, 3H).  **$^{13}\text{C}$  NMR (125 MHz,  $\text{CDCl}_3$ )**  $\delta$  157.5, 142.0, 133.0, 132.6, 128.8, 128.2, 127.5, 126.4, 126.2, 122.9, 122.7, 79.9, 79.1, 73.4, 63.6, 29.4, 28.3, 19.7, 19.5. **HRMS(ESI)** Calculated for  $\text{C}_{21}\text{H}_{26}\text{O}_3\text{N}^-$  ( $[\text{M}-\text{H}]^-$ ): 340.1918, found: 340.1921.

***tert*-butyl 3-hydroxy-2-methyl-3-(naphthalen-2-yl)azetidine-1-carboxylate (1u)**

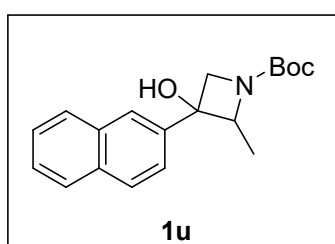

**$^1\text{H}$  NMR (500 MHz,  $\text{CDCl}_3$ )**  $\delta$  7.89 (d,  $J = 1.3$  Hz, 1H), 7.86–7.79 (m, 3H), 7.56–7.45 (m, 3H), 4.56 (s, 1H), 4.33 (d,  $J = 9.4$  Hz, 1H), 4.17–4.04 (m, 1H), 3.63 (s, 1H), 1.53 (d,  $J = 6.4$  Hz, 3H), 1.48 (s, 9H).  **$^{13}\text{C}$  NMR (126 MHz,  $\text{CDCl}_3$ )**  $\delta$  156.4, 141.0, 132.9, 132.6, 128.5, 128.1, 127.5,

126.3, 126.1, 123.3, 122.9, 79.7, 72.6, 68.7, 61.8, 28.4, 14.2. **HRMS(ESI)** Calculated for  $\text{C}_{19}\text{H}_{22}\text{O}_3\text{N}^-$  ( $[\text{M}-\text{H}]^-$ ): 312.1605, found: 312.1608.

***tert*-butyl 3-hydroxy-3-(naphthalen-2-yl)-2-phenylazetidine-1-carboxylate (1v)**

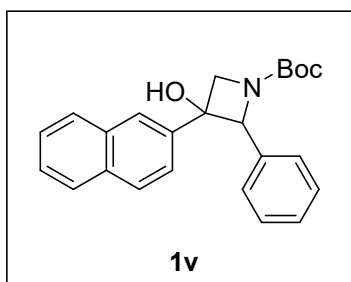

**$^1\text{H}$  NMR (500 MHz,  $\text{CDCl}_3$ )**  $\delta$  8.02 (s, 1H), 7.95 (d,  $J = 8.6$  Hz, 1H), 7.92–7.85 (m, 2H), 7.72–7.65 (m, 1H), 7.58–7.49 (m, 2H), 7.48–7.42 (m, 2H), 7.42–7.33 (m, 3H), 5.57 (s, 1H), 4.58 (d,  $J = 9.2$  Hz, 1H), 4.24 (d,  $J = 9.6$  Hz, 1H), 2.25 (s, 1H), 1.43 (s, 9H).  **$^{13}\text{C}$  NMR (125 MHz,  $\text{CDCl}_3$ )**  $\delta$  156.3, 140.5, 135.0, 133.0, 132.8, 128.8,

128.8, 128.4, 128.3, 127.6, 127.0, 126.5, 126.3, 123.5, 122.8, 80.2, 73.2, 28.3. **HRMS(ESI)** Calculated for  $\text{C}_{24}\text{H}_{24}\text{O}_3\text{N}^-$  ( $[\text{M}-\text{H}]^-$ ): 374.1762, found: 374.1765.

**(3-hydroxy-3-(naphthalen-2-yl)azetidin-1-yl)(phenyl)methanone (1w)**

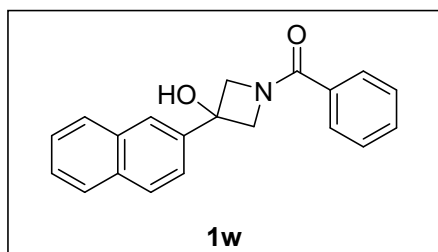

**$^1\text{H}$  NMR (500 MHz,  $\text{CDCl}_3$ )**  $\delta$  7.92 (s, 1H), 7.84–7.74 (m, 3H), 7.61–7.51 (m, 3H), 7.51–7.45 (m,

2H), 7.45–7.40 (m, 1H), 7.37–7.28 (m, 2H), 5.47 (s, 1H), 4.74–4.44 (m, 4H).  $^{13}\text{C}$  NMR (125 MHz,  $\text{CDCl}_3$ )  $\delta$  170.5, 140.2, 132.8, 132.6, 132.6, 131.1, 128.6, 128.3, 128.1, 127.8, 127.5, 126.3, 126.1, 123.4, 122.7, 71.3, 68.3, 63.7. HRMS(ESI) Calculated for  $\text{C}_{20}\text{H}_{16}\text{O}_2\text{N}^-$  ( $[\text{M}-\text{H}]^-$ ): 302.1187, found: 302.1188.

**(3-ethyl-3-hydroxyazetidin-1-yl)(phenyl)methanone (1x)**

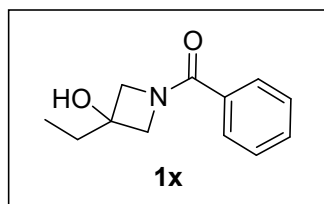

$^1\text{H}$  NMR (500 MHz,  $\text{CDCl}_3$ )  $\delta$  7.54–7.49 (m, 2H), 7.42–7.36 (m, 1H), 7.34–7.29 (m, 2H), 4.83 (s, 1H), 4.19–3.96 (m, 4H), 1.70 (q,  $J = 7.4$  Hz, 2H), 0.89 (t,  $J = 7.4$  Hz, 3H).  $^{13}\text{C}$  NMR (125 MHz,  $\text{CDCl}_3$ )  $\delta$  170.2, 132.9, 130.9, 128.2,

127.7, 70.7, 65.5, 61.2, 31.4, 7.4. HRMS(ESI) Calculated for  $\text{C}_{12}\text{H}_{14}\text{NO}_2^-$  ( $[\text{M}-\text{H}]^-$ ): 204.2495, found: 204.2498.

**benzyl 3-hydroxy-3-(naphthalen-2-yl)azetidine-1-carboxylate (1y)**

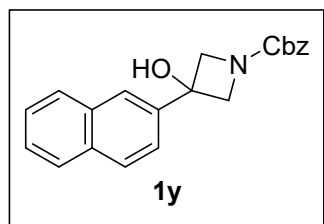

$^1\text{H}$  NMR (500 MHz,  $\text{CDCl}_3$ )  $\delta$  7.93 (d,  $J = 1.3$  Hz, 1H), 7.89–7.79 (m, 3H), 7.59–7.54 (m, 1H), 7.54–7.49 (m, 2H), 7.39–7.30 (m, 5H), 5.12 (s, 2H), 4.42 (d,  $J = 9.3$  Hz, 2H), 4.33 (d,  $J = 9.3$  Hz, 2H), 4.02 (s, 1H).  $^{13}\text{C}$  NMR (125 MHz,

$\text{CDCl}_3$ )  $\delta$  156.6, 140.1, 136.2, 132.8, 132.6, 128.7, 128.4, 128.1, 128.0, 127.9, 127.5, 126.4, 126.2, 123.3, 122.7, 71.5, 67.0, 64.1. HRMS(ESI) Calculated for  $\text{C}_{21}\text{H}_{18}\text{NO}_3^-$  ( $[\text{M}-\text{H}]^-$ ): 332.1287, found: 332.1290.

**benzyl 3-hydroxy-3-phenylazetidine-1-carboxylate (1z)**

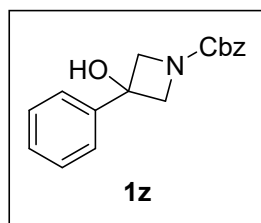

$^1\text{H}$  NMR (500 MHz,  $\text{CDCl}_3$ )  $\delta$  7.48–7.43 (m, 2H), 7.37 (dd,  $J_1 = 10.4$ ,  $J_2 = 4.8$  Hz, 2H), 7.35–7.25 (m, 6H), 5.08 (s, 2H), 4.30 (d,  $J = 9.3$  Hz, 2H), 4.22 (d,  $J = 9.3$  Hz, 2H), 3.42 (s, 1H).  $^{13}\text{C}$  NMR (125 MHz,  $\text{CDCl}_3$ )  $\delta$  156.6, 143.0 (s), 136.4, 128.7,

128.5, 128.1, 128.0, 124.6, 71.7, 67.0, 64.4. HRMS(ESI) Calculated for  $\text{C}_{17}\text{H}_{16}\text{NO}_3^-$  ( $[\text{M}-\text{H}]^-$ ): 282.1135, found: 282.1138.

**benzyl 3-(4-chlorophenyl)-3-hydroxyazetidine-1-carboxylate (1A)**

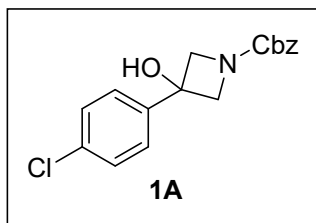

**<sup>1</sup>H NMR (500 MHz, CDCl<sub>3</sub>)** δ 7.44–7.37 (m, 2H), 7.37–7.25 (m, 7H), 5.08 (s, 2H), 4.28–4.15 (m, 4H), 3.66 (s, 1H).

**<sup>13</sup>C NMR (125 MHz, CDCl<sub>3</sub>)** δ 156.6, 141.6, 136.2, 133.8, 128.7, 128.5, 128.2, 128.0, 126.0, 71.1, 67.1, 64.7.

**HRMS(ESI)** Calculated for C<sub>17</sub>H<sub>15</sub>ClNO<sub>3</sub><sup>-</sup> ([M-H]<sup>-</sup>): 316.0745, found: 316.0748.

### 3 NHC-Catalyzed Deconstructive Isomerization of Azetidinols

#### 3.1 Optimization of reaction conditions

Survey of the reaction parameters<sup>a</sup>

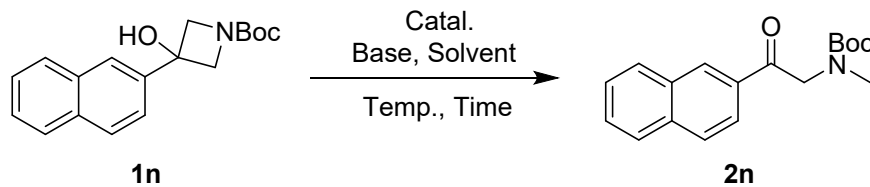

| Entry | Catal./equiv.          | Base/equiv.                            | Temp./°C | Solvent/mL         | Yield/% |
|-------|------------------------|----------------------------------------|----------|--------------------|---------|
| 1     | <b>NHC 1 (0.1)</b>     | <i>NaOt-Bu</i> (0.15)                  | 130      | <i>Toluene</i> (1) | 96      |
| 2     | <b>NHC 2</b> (0.1)     | <i>NaOt-Bu</i> (0.15)                  | 130      | <i>Toluene</i> (1) | 95      |
| 3     | <b>NHC 3</b> (0.1)     | <i>NaOt-Bu</i> (0.15)                  | 130      | <i>Toluene</i> (1) | 91      |
| 4     | <b>NHC 4</b> (0.1)     | <i>NaOt-Bu</i> (0.15)                  | 130      | <i>Toluene</i> (1) | 15      |
| 5     | <b>NHC 5</b> (0.1)     | <i>NaOt-Bu</i> (0.15)                  | 130      | <i>Toluene</i> (1) | 45      |
| 6     | <b>NHC 6</b> (0.1)     | <i>NaOt-Bu</i> (0.15)                  | 130      | <i>Toluene</i> (1) | 34      |
| 7     | <b>NHC 7</b> (0.1)     | <i>NaOt-Bu</i> (0.15)                  | 130      | <i>Toluene</i> (1) | 0       |
| 8     | <b>NHC 8</b> (0.1)     | <i>NaOt-Bu</i> (0.15)                  | 130      | <i>Toluene</i> (1) | trace   |
| 9     | <b>NHC 1</b> (0.05)    | <i>NaOt-Bu</i> (0.075)                 | 130      | <i>Toluene</i> (1) | 54      |
| 10    | - <sup>b</sup>         | <i>NaOt-Bu</i> (0.15)                  | 130      | <i>Toluene</i> (1) | 0       |
| 11    | - <sup>b</sup>         | <i>NaOt-Bu</i> (1)                     | 130      | <i>Toluene</i> (1) | 0       |
| 12    | <b>NHC 1</b> (0.1)     | - <sup>c</sup>                         | 130      | <i>Toluene</i> (1) | 0       |
| 13    | DABCO (0.1)            | - <sup>c</sup>                         | 130      | <i>Toluene</i> (1) | 0       |
| 14    | PPh <sub>3</sub> (0.1) | - <sup>c</sup>                         | 130      | <i>Toluene</i> (1) | 0       |
| 15    | <b>NHC 1</b> (0.1)     | Na <sub>2</sub> CO <sub>3</sub> (0.15) | 130      | <i>Toluene</i> (1) | 73      |
| 16    | <b>NHC 1</b> (0.1)     | K <sub>3</sub> PO <sub>4</sub> (0.15)  | 130      | <i>Toluene</i> (1) | 95      |
| 17    | <b>NHC 1</b> (0.1)     | K <i>Ot-Bu</i> (0.15)                  | 130      | <i>Toluene</i> (1) | 87      |
| 18    | <b>NHC 1</b> (0.1)     | NaOEt (0.15)                           | 130      | <i>Toluene</i> (1) | 94      |
| 19    | <b>NHC 1</b> (0.1)     | NaH (0.15)                             | 130      | <i>Toluene</i> (1) | 90      |
| 20    | <b>NHC 1</b> (0.1)     | Li <i>Ot-Bu</i> (0.15)                 | 130      | <i>Toluene</i> (1) | 68      |
| 21    | <b>NHC 1</b> (0.1)     | DABCO (0.15)                           | 130      | <i>Toluene</i> (1) | 0       |

|    |                    |                          |     |                        |                 |
|----|--------------------|--------------------------|-----|------------------------|-----------------|
| 22 | <b>NHC 1</b> (0.1) | DBU (0.15)               | 130 | Toluene (1)            | trace           |
| 23 | <b>NHC 1</b> (0.1) | Et <sub>3</sub> N (0.15) | 130 | Toluene (1)            | 0               |
| 24 | <b>NHC 1</b> (0.1) | NaOt-Bu (0.15)           | 110 | Toluene (1)            | 76              |
| 25 | <b>NHC 1</b> (0.1) | NaOt-Bu (0.15)           | 130 | Xylene (1)             | 81              |
| 26 | <b>NHC 1</b> (0.1) | NaOt-Bu (0.15)           | 130 | CH <sub>3</sub> CN (1) | 78              |
| 27 | <b>NHC 1</b> (0.1) | NaOt-Bu (0.15)           | 130 | Dioxane (1)            | 41              |
| 28 | <b>NHC 1</b> (0.1) | NaOt-Bu (0.15)           | 130 | THF (1)                | 5               |
| 29 | <b>NHC 1</b> (0.1) | NaOt-Bu (0.15)           | 130 | DMF (1)                | 46              |
| 30 | <b>NHC 1</b> (0.1) | NaOt-Bu (0.15)           | 130 | Toluene (1)            | 88 <sup>d</sup> |

<sup>a</sup>Reaction conditions unless otherwise noted: **1n** (0.4 mmol), Catal. (0.04 mmol), Solvent (1 mL), Base (0.06 mmol), for 12 h under N<sub>2</sub> atmosphere. <sup>b</sup>No catalyst. <sup>c</sup>No base. <sup>d</sup>for 8 h.

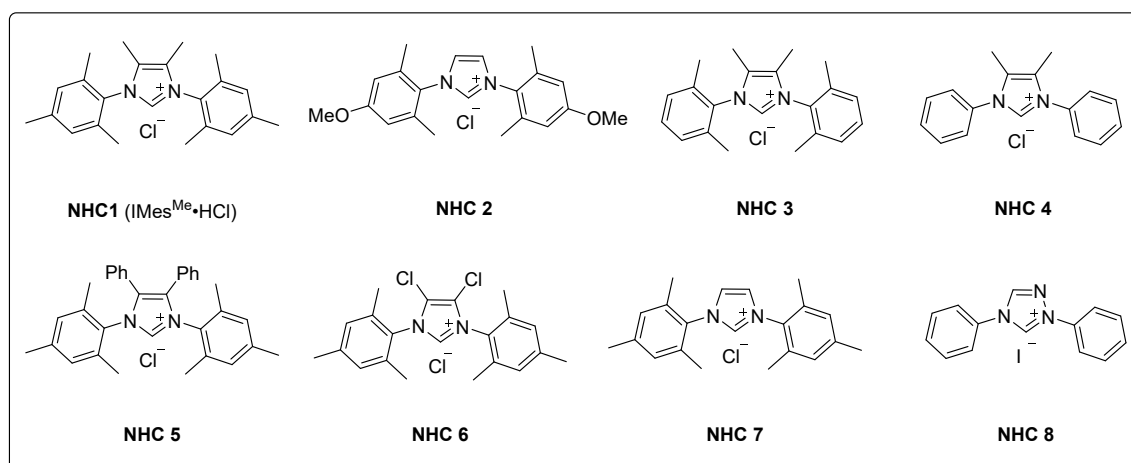

## 3.2 Experimental details and characterization of products

*Typical procedure:*

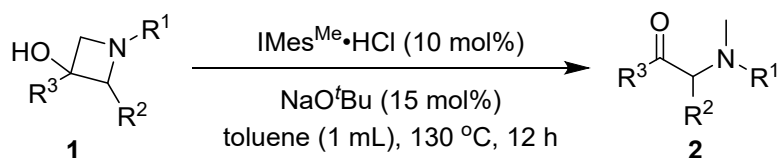

To a 25 ml flame-dried Schlenk tube containing a stirring bar was added IMes<sup>Me</sup>·HCl (**NHC 1**, 0.04 mmol, 14.7 mg.), NaOt-Bu (0.06 mmol, 6.0 mg), *tert*-butyl 3-hydroxy-3-(naphthalen-2-yl)azetidine-1-carboxylate **1n** (0.4 mmol, 120 mg), toluene (1.0 mL) sequentially under nitrogen. The tube was sealed and stirred at 130 °C for 12 h. After completion, the reaction mixture was concentrated and purified by silica gel column

chromatography to provide the product **2n** in 96% yield.

### Modified procedure for the synthesis of **2m** and **2s**

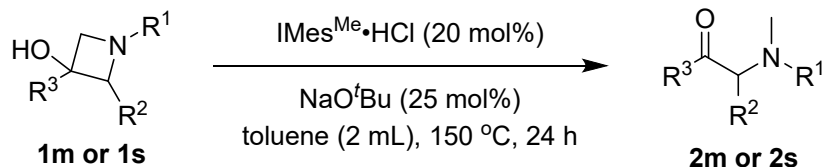

To a 25 ml flame-dried Schlenk tube containing a stirring bar was added  $\text{IMes}^{\text{Me}}\cdot\text{HCl}$  (0.08 mmol, 29.4 mg.),  $\text{NaO}^t\text{-Bu}$  (0.1 mmol, 9.8 mg), **1m** or **1s** (0.4 mmol), toluene (2.0 mL) sequentially under nitrogen. The tube was sealed and stirred at 150 °C for 24 h. After completion, the reaction mixture was concentrated and purified by silica gel column chromatography to provide the product **2m** or **2s**.

### *tert*-butyl methyl(2-oxo-2-phenylethyl)carbamate (**2a**)<sup>5</sup>

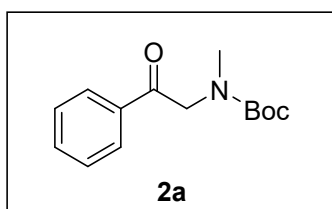

Purified by flash column chromatography (PE/EA = 10:1 to 5:1) as yellow oil (88 mg, 88% yield). NMR data show the presence of rotamers.

**<sup>1</sup>H NMR (500 MHz, CDCl<sub>3</sub>)**  $\delta$  8.01–7.90 (m, 2H), 7.65–7.54 (m, 1H), 7.52–7.41 (m, 2H), 4.64 (d, 2H), 2.96 (d, 3H), 1.44 (d, 9H). **<sup>13</sup>C NMR (125 MHz, CDCl<sub>3</sub>)**  $\delta$  195.1, 194.7, 156.1, 155.6, 135.2, 135.1, 133.4, 133.4, 128.7, 128.6, 127.8, 127.6, 79.9, 79.9, 55.6, 55.0, 35.6, 35.5, 28.3, 28.1.

### *tert*-butyl methyl(2-oxo-2-(*p*-tolyl)ethyl)carbamate (**2b**)

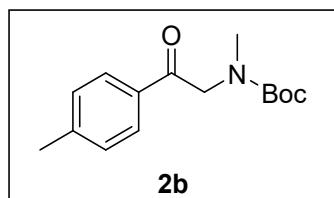

Purified by flash column chromatography (PE/EA = 10:1 to 5:1) as white solid (90 mg, 86% yield). mp: 71–73 °C. NMR data show the presence of rotamers.

**<sup>1</sup>H NMR (500 MHz, CDCl<sub>3</sub>)**  $\delta$  7.88–7.80 (m, 2H), 7.32–7.23 (m, 2H), 4.61 (d, 2H), 2.95 (d, 3H), 2.41 (d, 3H), 1.44 (d, 9H). **<sup>13</sup>C NMR (125 MHz, CDCl<sub>3</sub>)**  $\delta$  194.7, 194.3, 156.2, 155.7, 144.3, 144.2, 132.7, 129.4, 129.3, 127.9, 127.8, 79.9, 79.8, 55.5, 54.9, 35.6, 35.5, 28.3, 28.2, 21.6. **HRMS(ESI)** Calculated for

$C_{15}H_{21}O_3NNa^+$  ( $[M+Na]^+$ ): 286.1414, found: 286.1411.

***tert*-butyl (2-(4-methoxyphenyl)-2-oxoethyl)(methyl)carbamate (2c)**

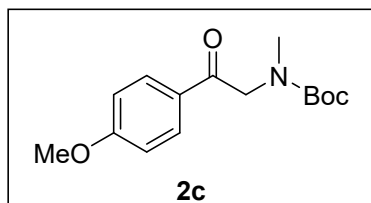

Purified by flash column chromatography (PE/EA = 10:1 to 4:1) as colorless oil (104 mg, 93% yield). NMR data show the presence of rotamers.

**$^1H$  NMR (500 MHz,  $CDCl_3$ )**  $\delta$  7.96–7.90 (m, 2H), 6.98–6.90 (m, 2H), 4.59 (d, 2H), 3.87 (d, 3H), 2.95 (d, 3H), 1.44 (d, 9H).  **$^{13}C$  NMR (125 MHz,  $CDCl_3$ )**  $\delta$  193.5, 193.1, 163.6, 163.6, 156.1, 155.7, 130.0, 129.8, 128.2, 113.8, 113.7, 79.8, 79.7, 55.4, 55.3, 55.1, 54.6, 35.6, 35.5, 28.2, 28.1. **HRMS(ESI)** Calculated for  $C_{15}H_{21}O_4NNa^+$  ( $[M+Na]^+$ ): 302.1363, found: 302.1361.

***tert*-butyl (2-(4-(dimethylamino)phenyl)-2-oxoethyl)(methyl)carbamate (2d)**

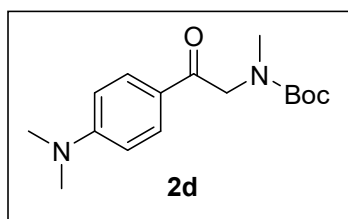

Purified by flash column chromatography (PE/EA = 10:1 to 4:1) as white solid (110 mg, 94% yield). mp: 74–76 °C. NMR data show the presence of rotamers.

**$^1H$  NMR (500 MHz,  $CDCl_3$ )**  $\delta$  7.88–7.82 (m, 2H), 6.69–6.60 (m, 2H), 4.56 (d, 2H), 3.05 (d, 6H), 2.94 (d, 3H), 1.44 (d, 9H).  **$^{13}C$  NMR (125 MHz,  $CDCl_3$ )**  $\delta$  192.7, 192.3, 156.2, 155.9, 153.4, 129.9, 129.7, 123.1, 123.0, 110.6, 110.5, 79.5, 79.5, 54.7, 54.2, 39.8, 35.5, 35.4, 28.3, 28.2. **HRMS(ESI)** Calculated for  $C_{16}H_{24}O_3N_2Na^+$  ( $[M+Na]^+$ ): 315.1679, found: 315.1676.

***tert*-butyl methyl(2-(4-(methylthio)phenyl)-2-oxoethyl)carbamate (2e)**

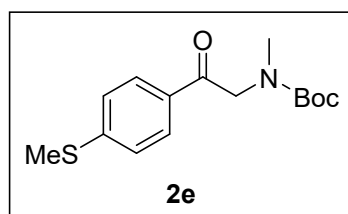

Purified by flash column chromatography (PE/EA = 10:1 to 5:1) as yellow solid (112 mg, 93% yield). mp: 48–50 °C. NMR data show the presence of rotamers.

**$^1H$  NMR (500 MHz,  $CDCl_3$ )**  $\delta$  7.89 – 7.78 (m, 2H), 7.32 – 7.20 (m, 2H), 4.57 (d, 2H), 2.93 (d, 3H), 2.49 (d, 3H), 1.41 (d, 9H).  **$^{13}C$  NMR (125 MHz,  $CDCl_3$ )**  $\delta$  194.0, 193.7, 156.1, 155.6, 146.4, 146.3, 131.4, 128.2, 128.0, 125.0,

124.9, 79.9, 79.8, 55.3, 54.7, 35.6, 35.5, 28.3, 28.1, 14.6. **HRMS(ESI)** Calculated for  $C_{15}H_{21}O_3NNaS^+$  ( $[M+Na]^+$ ): 318.1134, found: 318.1132.

***tert*-butyl (2-(4-fluorophenyl)-2-oxoethyl)(methyl)carbamate (2f)**

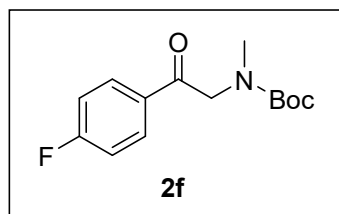

Purified by flash column chromatography (PE/EA = 10:1 to 5:1) as white solid (41 mg, 38% yield). mp: 72-74 °C. NMR data show the presence of rotamers.

**$^1H$  NMR (500 MHz,  $CDCl_3$ )**  $\delta$  8.07–7.91 (m, 2H), 7.22–7.07 (m, 2H), 4.60 (d, 2H), 2.96 (d, 3H), 1.44 (d, 9H).  **$^{13}C$  NMR (125 MHz,  $CDCl_3$ )**  $\delta$  193.7, 193.3, 166.9, 164.9, 156.2, 155.6, 131.7, 130.6, 130.6, 130.4, 130.3, 116.0, 115.9, 115.7, 80.1, 80.1, 55.5, 54.9, 35.7, 35.6, 28.3, 28.2. **HRMS(ESI)** Calculated for  $C_{14}H_{18}O_3NFNa^+$  ( $[M+Na]^+$ ): 290.1163, found: 290.1163.

***tert*-butyl (2-(4-chlorophenyl)-2-oxoethyl)(methyl)carbamate (2g)<sup>6</sup>**

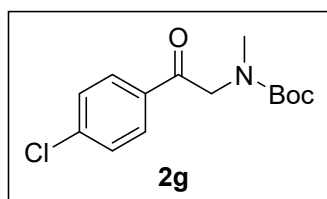

Purified by flash column chromatography (PE/EA = 10:1 to 5:1) as colorless oil (84 mg, 74% yield). NMR data show the presence of rotamers.

**$^1H$  NMR (500 MHz,  $CDCl_3$ )**  $\delta$  7.89–7.83 (m, 2H), 7.47–7.37 (m, 2H), 4.57 (d, 2H), 2.93 (d, 3H), 1.41 (d, 9H).  **$^{13}C$  NMR (125 MHz,  $CDCl_3$ )**  $\delta$  194.0, 193.6, 156.1, 155.5, 139.9, 139.8, 133.4, 129.2, 129.0, 128.9, 80.0, 80.0, 55.5, 54.9, 35.6, 35.5, 28.2, 28.1.

***tert*-butyl (2-(4-bromophenyl)-2-oxoethyl)(methyl)carbamate (2h)<sup>6</sup>**

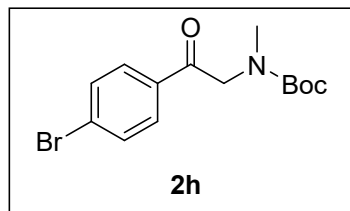

Purified by flash column chromatography (PE/EA = 10:1 to 5:1) as yellow oil (108 mg, 83% yield). NMR data show the presence of rotamers.

**$^1H$  NMR (500 MHz,  $CDCl_3$ )**  $\delta$  7.87–7.74 (m, 2H), 7.68–7.56 (m, 2H), 4.59 (d, 2H), 2.95 (d, 3H), 1.43 (d, 9H).  **$^{13}C$  NMR (125 MHz,  $CDCl_3$ )**  $\delta$  194.3, 193.9, 156.2, 155.6, 133.9, 132.1, 132.0, 129.4, 129.2, 128.7, 128.6, 126.4, 80.2,

80.1, 55.6, 55.0, 35.7, 35.6, 28.3, 28.3, 28.2.

***tert*-butyl (2-(4-cyanophenyl)-2-oxoethyl)(methyl)carbamate (2i)**

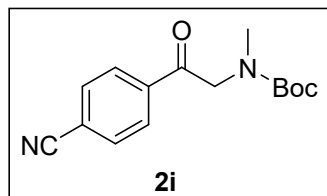

Purified by flash column chromatography (PE/EA = 10:1 to 4:1) as white solid (34 mg, 31% yield). mp: 114-116 °C. NMR data show the presence of rotamers.

**<sup>1</sup>H NMR (500 MHz, CDCl<sub>3</sub>)** δ 8.12–7.99 (m, 2H), 7.92–7.70 (m, 2H), 4.64 (d, 2H), 2.97 (d, 3H), 1.43 (d, 9H). **<sup>13</sup>C NMR (125 MHz, CDCl<sub>3</sub>)** δ 194.3, 193.8, 156.1, 155.4, 138.1, 132.6, 132.5, 132.2, 132.1, 130.9, 130.3, 128.3, 128.1, 127.9, 125.3, 117.7, 117.6, 116.7, 116.6, 81.6, 80.4, 80.3, 55.9, 55.3, 35.7, 35.6, 28.2, 28.2, 28.1. **HRMS(ESI)** Calculated for C<sub>15</sub>H<sub>17</sub>O<sub>3</sub>N<sub>2</sub><sup>+</sup> ([M-H]<sup>+</sup>): 273.1245, found: 273.1245.

***tert*-butyl methyl(2-oxo-2-(4-(trifluoromethyl)phenyl)ethyl)carbamate (2j)**

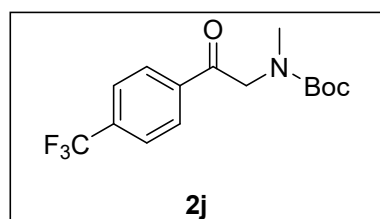

Purified by flash column chromatography (PE/EA = 10:1 to 5:1) as yellow solid (33 mg, 26% yield). mp: 72-74 °C. NMR data show the presence of rotamers.

**<sup>1</sup>H NMR (500 MHz, CDCl<sub>3</sub>)** δ 9.12–9.00 (m, 2H), 8.81–8.68 (m, 2H), 5.64 (d, 2H), 3.97 (d, 3H), 2.44 (d, 10H). **<sup>13</sup>C NMR (125 MHz, CDCl<sub>3</sub>)** δ 194.6, 194.1, 156.2, 155.5, 137.9, 128.3, 128.1, 125.9, 125.8, 125.7, 80.3, 80.3, 55.9, 55.3, 35.7, 35.6, 28.3, 28.2. **HRMS(ESI)** Calculated for C<sub>15</sub>H<sub>17</sub>O<sub>3</sub>NF<sub>3</sub><sup>+</sup> ([M-H]<sup>+</sup>): 316.1166, found: 316.1166.

**methyl 4-(N-(*tert*-butoxycarbonyl)-N-methylglycyl)benzoate (2k)**

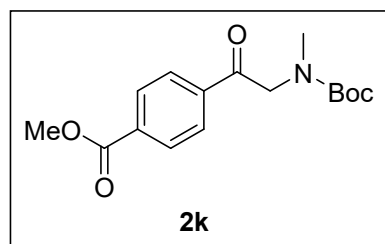

Purified by flash column chromatography (PE/EA = 10:1 to 5:1) as yellow oil (25 mg, 20% yield). NMR data show the presence of rotamers.

**<sup>1</sup>H NMR (500 MHz, CDCl<sub>3</sub>)** δ 8.20–8.10 (m, 2H), 8.06–7.94 (m, 2H), 4.64 (d, 2H), 3.95 (d, 3H), 2.97 (d,

3H), 1.43 (d, 9H). **<sup>13</sup>C NMR (125 MHz, CDCl<sub>3</sub>)** δ 194.9, 194.6, 192.3, 166.1, 156.2, 155.6, 138.4, 134.2, 130.0, 129.9, 129.5, 128.4, 127.8, 127.7, 127.4, 124.6, 81.3, 80.3, 56.0, 55.4, 52.5, 35.7, 35.6, 28.4, 28.3, 28.2. **HRMS(ESI)** Calculated for C<sub>16</sub>H<sub>21</sub>O<sub>5</sub>NNa<sup>+</sup> ([M+Na]<sup>+</sup>): 330.1312, found: 330.1311.

***tert*-butyl methyl(2-oxo-2-(*m*-tolyl)ethyl)carbamate (2l)**

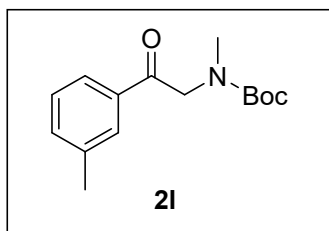

Purified by flash column chromatography (PE/EA = 10:1 to 5:1) as colorless oil (88 mg, 84% yield). NMR data show the presence of rotamers.

**<sup>1</sup>H NMR (500 MHz, CDCl<sub>3</sub>)** δ 7.78–7.70 (m, 2H), 7.44–7.31 (m, 2H), 4.63 (d, 2H), 2.95 (d, 3H), 2.41 (d, 3H), 1.44

(d, 9H). **<sup>13</sup>C NMR (125 MHz, CDCl<sub>3</sub>)** δ 199.3, 198.8, 156.2, 155.7, 138.5, 138.2, 135.9, 135.7, 132.0, 132.0, 131.6, 128.2, 127.7, 125.7, 125.6, 79.9, 57.7, 57.0, 35.7, 35.7, 28.3, 28.2, 21.1, 20.9. **HRMS(ESI)** Calculated for C<sub>15</sub>H<sub>21</sub>ONNa<sup>+</sup> ([M+Na]<sup>+</sup>): 286.1414, found: 286.1412.

***tert*-butyl methyl(2-oxo-2-(*o*-tolyl)ethyl)carbamate (2m)**

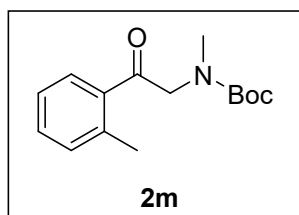

Purified by flash column chromatography (PE/EA = 10:1 to 5:1) as colorless oil (45 mg, 43% yield). NMR data show the presence of rotamers.

**<sup>1</sup>H NMR (500 MHz, CDCl<sub>3</sub>)** δ 7.69–7.54 (m, 1H), 7.44–7.34 (m, 1H), 7.30–7.23 (m, 2H), 4.49 (d, 2H), 2.96 (d, 3H), 2.51

(d, 3H), 1.45 (d, 9H). **<sup>13</sup>C NMR (125 MHz, CDCl<sub>3</sub>)** δ 199.3, 198.8, 156.2, 155.7, 138.5, 138.2, 135.9, 135.7, 132.0, 132.0, 131.6, 128.2, 127.7, 125.7, 125.6, 79.9, 57.7, 57.0, 35.7, 35.7, 28.3, 28.2, 21.1, 20.9. **HRMS(ESI)** Calculated for C<sub>15</sub>H<sub>21</sub>ONNa<sup>+</sup> ([M+Na]<sup>+</sup>): 286.1414, found: 286.1411.

***tert*-butyl methyl(2-(naphthalen-2-yl)-2-oxoethyl)carbamate (2n)**

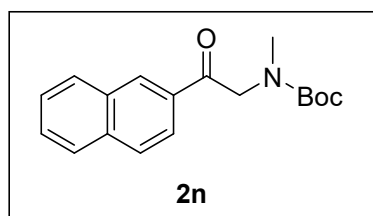

Purified by flash column chromatography (PE/EA =

10:1 to 5:1) as off-white solid (115 mg, 96% yield). mp: 71-73 °C. NMR data show the presence of rotamers.

**<sup>1</sup>H NMR (500 MHz, CDCl<sub>3</sub>)** δ 8.47 (d, 1H), 8.05-7.85 (m, 4H), 7.66-7.54 (m, 2H), 4.78 (d, 2H), 3.01 (d, 3H), 1.46 (d, 9H). **<sup>13</sup>C NMR (125 MHz, CDCl<sub>3</sub>)** δ 195.2, 194.7, 156.2, 155.7, 135.7, 132.5, 132.4, 129.6, 129.5, 129.4, 129.2, 128.7, 128.6, 128.6, 128.5, 127.8, 127.8, 126.9, 126.8, 123.5, 123.4, 80.0, 80.0, 55.7, 55.1, 35.7, 35.5, 28.3, 28.2. **HRMS(ESI)** Calculated for C<sub>18</sub>H<sub>21</sub>O<sub>3</sub>NNa<sup>+</sup> ([M+Na]<sup>+</sup>): 322.1414, found: 322.1411.

***tert*-butyl (2-(benzo[d][1,3]dioxol-5-yl)-2-oxoethyl)(methyl)carbamate (2o)**

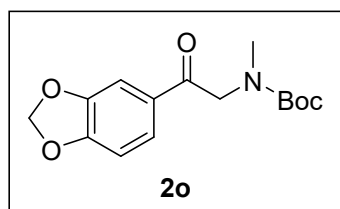

Purified by flash column chromatography (PE/EA = 10:1 to 4:1) as colorless oil (96 mg, 82% yield). NMR data show the presence of rotamers.

**<sup>1</sup>H NMR (500 MHz, CDCl<sub>3</sub>)** δ 7.58–7.49 (m, 1H), 7.44–7.39 (m, 1H), 6.89–6.82 (m, 1H), 6.05 (d, 2H), 4.56 (d, 2H), 2.94 (d, 3H), 1.44 (d, 9H). **<sup>13</sup>C NMR (125 MHz, CDCl<sub>3</sub>)** δ 193.2, 192.8, 156.2, 155.7, 152.1, 152.0, 148.3, 148.2, 123.0, 124.1, 123.8, 108.0, 108.0, 107.7, 107.6, 101.9, 101.9, 78.0, 79.9, 55.4, 54.8, 35.7, 35.6, 28.4, 28.2. **HRMS(ESI)** Calculated for C<sub>15</sub>H<sub>19</sub>O<sub>5</sub>NNa<sup>+</sup> ([M+Na]<sup>+</sup>): 316.1155, found: 316.1153.

***tert*-butyl (2-(benzofuran-5-yl)-2-oxoethyl)(methyl)carbamate (2p)**

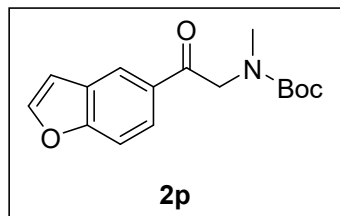

Purified by flash column chromatography (PE/EA = 10:1 to 5:1) as white solid (50 mg, 43% yield). mp: 80-82 °C. NMR data show the presence of rotamers.

**<sup>1</sup>H NMR (500 MHz, CDCl<sub>3</sub>)** δ 8.24 (d, *J* = 9.4 Hz, 1H), 7.97–7.91 (m, 1H), 7.75–7.65 (m, 1H), 7.59–7.51 (m, 1H), 6.90–6.79 (m, 1H), 4.69 (d, 2H), 2.97 (d, 3H), 1.44 (d, 9H). **<sup>13</sup>C NMR (125 MHz, CDCl<sub>3</sub>)** δ 194.6, 194.1, 157.5, 156.2, 155.7, 146.5, 146.4, 130.7, 127.60 (s), 127.5, 124.5, 124.3, 122.1, 121.9, 111.7, 111.6, 107.2, 107.2, 79.9, 79.9, 55.6, 55.0, 35.7, 35.5,

28.3, 28.2. **HRMS(ESI)** Calculated for  $C_{16}H_{19}O_4NNa^+$  ( $[M+Na]^+$ ): 312.1206, found: 312.1205.

***tert*-butyl methyl(2-oxo-2-(thiophen-2-yl)ethyl)carbamate (2q)**

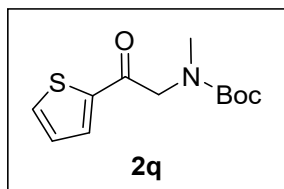

Purified by flash column chromatography (PE/EA = 10:1 to 5:1) as yellow oil (75 mg, 73% yield). NMR data show the presence of rotamers.

**$^1H$  NMR (500 MHz,  $CDCl_3$ )**  $\delta$  7.82–7.73 (m, 1H), 7.73–7.62 (m, 1H), 7.20–7.09 (m, 1H), 4.55 (d, 2H), 2.98 (d, 3H), 1.43 (d, 9H).  **$^{13}C$  NMR (125 MHz,  $CDCl_3$ )**  $\delta$  188.2, 188.0, 156.1, 155.5, 141.5, 141.3, 133.7, 131.9, 131.6, 128.1, 80.1, 80.0, 55.8, 55.1, 35.7, 35.6, 28.3, 28.1. **HRMS(ESI)** Calculated for  $C_{12}H_{17}O_3NNaS^+$  ( $[M+Na]^+$ ): 278.0821, found: 278.0820.

***tert*-butyl methyl(2-oxo-5-phenylpentyl)carbamate (2r)**

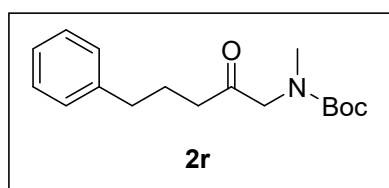

Purified by flash column chromatography (PE/EA = 10:1 to 5:1) as yellow oil (47 mg, 41% yield). NMR data show the presence of rotamers.

**$^1H$  NMR (500 MHz,  $CDCl_3$ )**  $\delta$  7.32–7.26 (m, 2H), 7.22–7.14 (m, 3H), 3.92 (d, 2H), 2.87 (d, 3H), 2.68–2.58 (m, 2H), 2.44–2.33 (m, 2H), 1.98–1.90 (m, 2H), 1.43 (d, 9H).  **$^{13}C$  NMR (125 MHz,  $CDCl_3$ )**  $\delta$  206.4, 206.3, 156.1, 155.4, 141.4, 141.2, 128.4, 128.4, 128.3, 126.0, 125.9, 80.0, 80.0, 62.2, 58.6, 57.9, 38.7, 38.4, 35.7, 35.0, 34.2, 32.0, 28.3, 28.2, 24.8, 24.8. **HRMS(ESI)** Calculated for  $C_{17}H_{25}O_3NNa^+$  ( $[M+Na]^+$ ): 314.1727, found: 314.1725.

***tert*-butyl methyl(6-(naphthalen-2-yloxy)-2-oxohexyl)carbamate (2s)**

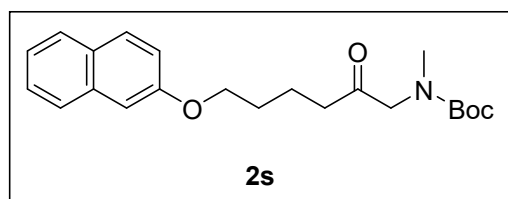

Purified by flash column chromatography (PE/EA = 10:1 to 5:1) as yellow oil (90 mg, 61% yield). NMR data show the presence of rotamers.

**<sup>1</sup>H NMR (500 MHz, CDCl<sub>3</sub>)** δ 7.84–7.63 (m, 3H), 7.47–7.38 (m, 1H), 7.37–7.27 (m, 1H), 7.19–7.06 (m, 2H), 4.05 (d, 2H), 3.95 (d, 2H), 2.88 (d, 3H), 2.55–2.42 (m, 2H), 1.83 (d, 4H), 1.43 (d, 9H). **<sup>13</sup>C NMR (125 MHz, CDCl<sub>3</sub>)** δ 206.3, 206.2, 156.8, 156.8, 156.0, 155.3, 134.5, 129.3, 129.2, 128.8, 127.5, 126.6, 126.3, 126.2, 123.5, 123.4, 118.8, 118.8, 106.5, 80.0, 80.0, 67.4, 67.3, 58.5, 57.8, 39.0, 38.8, 35.7, 28.6, 28.6, 28.3, 28.2, 20.2, 20.0. **HRMS(ESI)** Calculated for C<sub>22</sub>H<sub>29</sub>O<sub>4</sub>NNa<sup>+</sup> ([M+Na]<sup>+</sup>): 394.1989, found: 394.1987.

***tert*-butyl methyl(3-methyl-1-(naphthalen-2-yl)-1-oxobutan-2-yl)carbamate (2t)**

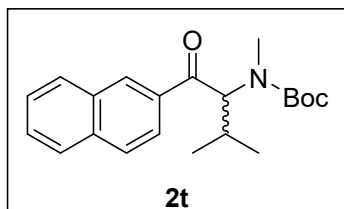

Purified by flash column chromatography (PE/EA = 15:1 to 6:1) as yellow oil (50 mg, 88% yield). NMR data show the presence of rotamers.

**<sup>1</sup>H NMR (400 MHz, CDCl<sub>3</sub>)** δ 8.81 (s, 1H), 8.61 (s, 1H), 8.18 – 8.11 (m, 1H), 8.10 – 8.05 (m, 1H), 8.03 – 7.93 (m, 1H), 7.92 – 7.78 (m, 2H), 7.64 – 7.44 (m, 2H), 5.49 (d, 1H), 5.24 (d, 1H), 2.68 (d, 3H), 2.57 – 2.42 (m, 1H), 1.53 (d, 9H), 1.05 – 0.91 (m, 6H). **<sup>13</sup>C NMR (100 MHz, CDCl<sub>3</sub>)** δ 197.9, 197.2, 155.9, 155.0, 135.7, 133.6, 133.1, 132.6, 132.4, 130.9, 130.1, 129.8, 129.3, 128.6, 128.5, 128.4, 128.2, 127.8, 127.5, 126.8, 126.6, 124.1, 80.6, 80.1, 63.8, 62.7, 29.2, 28.9, 28.5, 28.2, 26.1, 25.7, 20.0, 19.9, 18.5, 18.1. **HRMS(ESI)** Calculated for C<sub>21</sub>H<sub>27</sub>O<sub>3</sub>NNa<sup>+</sup> ([M+Na]<sup>+</sup>): 364.1883, found: 364.1880.

***tert*-butyl methyl(1-(naphthalen-2-yl)-1-oxopropan-2-yl)carbamate (2u)**

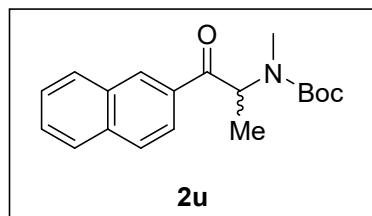

Purified by flash column chromatography (PE/EA = 15:1 to 6:1) as colorless oil (50 mg, 40% yield). NMR data show the presence of rotamers.

**<sup>1</sup>H NMR (500 MHz, CDCl<sub>3</sub>)** δ 8.61 (s, 0.66H), 8.45 (s, 0.34H), 8.13–7.82 (m, 4H), 7.65–7.47 (m, 2H), 5.97–5.81 (m, 0.66H), 5.46–5.33 (m, 0.32H), 2.73 (d, 3H), 1.46 (s, 9H), 1.42 (d, 3H). **<sup>13</sup>C NMR (125 MHz, CDCl<sub>3</sub>)** δ 199.7, 198.8, 155.5, 154.6, 135.6, 132.9, 132.6, 130.2, 129.7, 129.6, 129.4, 128.4, 128.3,

127.7, 127.6, 126.8, 126.6, 124.1, 80.6, 80.2, 56.8, 54.6, 30.5, 29.4, 28.3, 13.8, 13.3.

**HRMS(ESI)** Calculated for  $C_{19}H_{23}O_3NNa^+$  ( $[M+Na]^+$ ): 336.1570, found: 336.1568.

***tert*-butyl benzyl(2-(naphthalen-2-yl)-2-oxoethyl)carbamate (2v)**

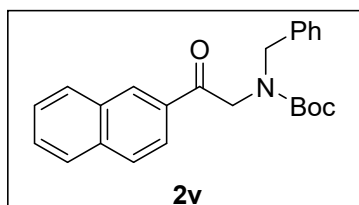

Purified by flash column chromatography (PE/EA = 15:1 to 6:1) as yellow oil (50 mg, 87% yield). NMR data show the presence of rotamers.

**$^1H$  NMR (400 MHz,  $CDCl_3$ )**  $\delta$  8.39 (d, 1H), 8.00–7.93 (m, 1H), 7.93–7.77 (m, 3H), 7.65–7.47 (m, 2H), 7.36–7.23 (m, 5H), 4.76 (s, 1H), 4.66 (s, 1H), 4.60 (d, 2H), 1.47 (d, 9H).  **$^{13}C$  NMR (100 MHz,  $CDCl_3$ )**  $\delta$  195.0, 194.6, 156.0, 155.9, 137.8, 137.7, 135.6, 132.4, 132.4, 132.3, 129.6, 129.5, 129.4, 129.2, 128.6, 128.5, 128.5, 128.1, 127.8, 127.7, 127.5, 127.4, 127.3, 126.9, 126.8, 123.5, 123.4, 80.6, 80.3, 52.4, 52.1, 51.3, 51.0, 28.3, 28.2. **HRMS(ESI)** Calculated for  $C_{24}H_{25}O_3NNa^+$  ( $[M+Na]^+$ ): 398.1727, found: 398.1726.

**N-methyl-N-(2-(naphthalen-2-yl)-2-oxoethyl)benzamide (2w)**

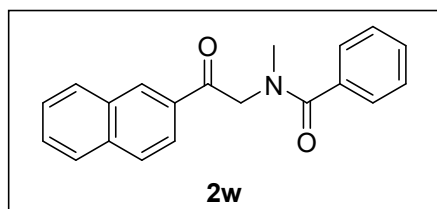

Purified by flash column chromatography (DCM/EA = 10:1 to 4:1) as white solid (107 mg, 88% yield). mp: 136-138 °C. NMR data show the presence of rotamers.

**$^1H$  NMR (500 MHz,  $CDCl_3$ )**  $\delta$  8.37 (d, 1H), 8.09–7.90 (m, 1H), 7.90–7.77 (m, 3H), 7.66–7.47 (m, 3H), 7.46–7.35 (m, 3H), 7.29 (s, 1H), 4.96 (d, 2H), 3.12 (d, 3H).  **$^{13}C$  NMR (125 MHz,  $CDCl_3$ )**  $\delta$  193.9, 193.8, 172.4 171.9, 135.9, 135.6, 132.3, 132.2, 132.1, 131.7, 129.6, 129.6, 129.4, 129.3, 128.8, 128.6, 128.6, 128.5, 128.4, 128.3, 127.6, 127.0, 126.9, 126.8, 126.4, 123.3, 123.0, 57.8, 53.8, 38.7, 34.6. **HRMS(ESI)** Calculated for  $C_{20}H_{17}O_2NNa^+$  ( $[M+Na]^+$ ): 326.1152, found: 326.1149.

**N-methyl-N-(2-oxobutyl)benzamide (2x)**

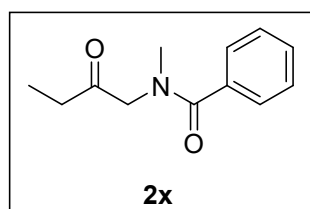

Purified by flash column chromatography (DCM/EA = 10:1

to 4:1) as colorless oil (30 mg, 37% yield). NMR data show the presence of rotamers.

**<sup>1</sup>H NMR (500 MHz, CDCl<sub>3</sub>)** δ 7.58–7.28 (m, 5H), 4.19 (d, 2H), 3.04 (d, 3H), 2.39 (q, *J* = 7.3 Hz, 2H), 1.08 (t, *J* = 7.3 Hz, 3H). **<sup>13</sup>C NMR (125 MHz, CDCl<sub>3</sub>)** δ 205.7, 171.9, 135.6, 129.7, 128.5, 128.4, 127.1, 126.4, 56.4, 38.9, 33.3, 29.7, 7.4. **HRMS(ESI)** Calculated for C<sub>12</sub>H<sub>15</sub>O<sub>2</sub>NNa<sup>+</sup> ([M+Na]<sup>+</sup>): 228.0994, found: 228.0992.

### 3.3 One-pot synthesis of oxazol-2-ones from azetindinols

*General procedure:*

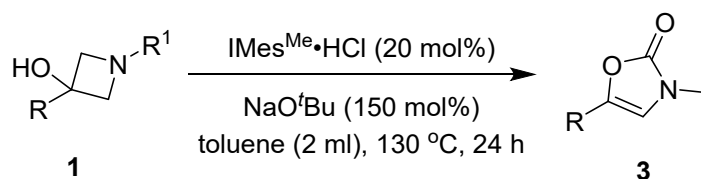

One-pot procedure for the synthesis of **3**: To a 25 ml flame-dried Schlenk tube containing a stirring bar was added IMes<sup>Me</sup>·HCl (0.08 mmol, 29.4 mg.), NaO<sup>t</sup>-Bu (0.6 mmol, 58.8 mg), *tert*-butyl 3-hydroxy-3-(naphthalen-2-yl)azetidine-1-carboxylate **1n** (0.4 mmol, 120 mg), toluene (2.0 mL) sequentially under nitrogen. The tube was sealed and stirred at 150 °C for 24 h. After completion, the reaction mixture was concentrated and purified by silica gel column chromatography to provide the product **3a** in 63% yield.

#### 3-methyl-5-(naphthalen-2-yl)oxazol-2(3H)-one (**3a**)

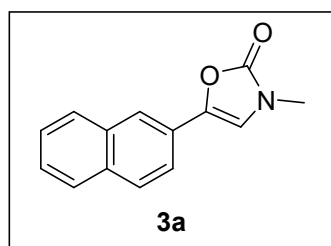

Purified by flash column chromatography (DCM/EA = 20:1) as off-white solid (57 mg, 63% yield). mp: 181-183 °C. Under modified reaction conditions: **NHC 1** (10 mol%), NaO<sup>t</sup>Bu (15 mol%), Toluene (2 ml), 130 °C, 12 h, **3a** was isolated in 72% yield.

**<sup>1</sup>H NMR (500 MHz, CDCl<sub>3</sub>)** δ 7.96 (s, 1H), 7.83 – 7.77 (m, 3H), 7.51 – 7.44 (m, 3H), 6.80 (s, 1H), 3.31 (s, 3H). **<sup>13</sup>C NMR (125 MHz, CDCl<sub>3</sub>)** δ 155.2, 139.1, 133.3, 132.8, 128.6, 128.1, 127.7, 126.8, 126.4, 124.5, 121.8, 120.4, 111.0, 30.8. **HRMS(ESI)** Calculated for C<sub>14</sub>H<sub>11</sub>O<sub>2</sub>NNa<sup>+</sup> ([M+Na]<sup>+</sup>): 248.0682, found: 248.0683.

### 3-methyl-5-phenyloxazol-2(3H)-one (**3b**)

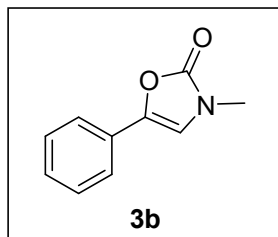

Under modified reaction conditions: **NHC 1** (10 mol%), NaO<sup>t</sup>Bu (15 mol%), Toluene (2 ml), 130 °C, 12 h, **3b** was isolated in 66% yield (46 mg). Purified by flash column chromatography (DCM/EA = 20:1) as white solid. mp: 142-144 °C

<sup>1</sup>H NMR (500 MHz, CDCl<sub>3</sub>) δ 7.52 – 7.44 (m, 2H), 7.41 – 7.35 (m, 2H), 7.33 – 7.27 (m, 1H), 6.74 (s, 1H), 3.30 (s, 3H). <sup>13</sup>C NMR (125 MHz, CDCl<sub>3</sub>) δ 155.2, 139.0, 128.8, 128.1, 127.3, 122.8, 110.5, 30.7.

### 5-(4-fluorophenyl)-3-methyloxazol-2(3H)-one (**3c**)

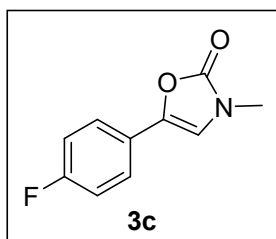

Purified by flash column chromatography (DCM/EA = 20:1) as white solid (35 mg, 45% yield). mp: 146-148 °C

<sup>1</sup>H NMR (500 MHz, CDCl<sub>3</sub>) δ 7.51–7.39 (m, 2H), 7.15–7.04 (m, 2H), 6.68 (s, 1H), 3.31 (s, 3H). <sup>13</sup>C NMR (125 MHz, CDCl<sub>3</sub>) δ 162.4 (d, <sup>1</sup>J<sub>C-F</sub> = 248.5 Hz), 155.1, 138.3, 124.8 (d, <sup>3</sup>J<sub>C-F</sub> = 8.2 Hz), 123.7, 116.0 (d, <sup>2</sup>J<sub>C-F</sub> = 22.2 Hz), 110.1, 30.8. HRMS(ESI) Calculated for C<sub>10</sub>H<sub>8</sub>O<sub>2</sub>NFNa<sup>+</sup> ([M+Na]<sup>+</sup>): 216.0431, found: 216.0432.

### 5-(4-chlorophenyl)-3-methyloxazol-2(3H)-one (**3d**)

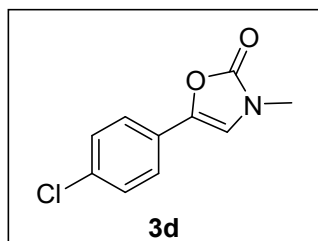

Purified by flash column chromatography (DCM/EA = 20:1) as white solid (44 mg, 53% yield). mp: 170-172 °C. Under modified reaction conditions: **NHC 1** (10 mol%), NaO<sup>t</sup>Bu (15 mol%), Toluene (2 ml), 130 °C, 12 h, **3d** was isolated in 61% yield.

<sup>1</sup>H NMR (500 MHz, CDCl<sub>3</sub>) δ 7.43–7.33 (m, 4H), 6.74 (s, 1H), 3.31 (s, 3H). <sup>13</sup>C NMR (125 MHz, CDCl<sub>3</sub>) δ 155.0, 138.1, 133.8, 129.1, 125.9, 124.1, 110.9, 30.8. HRMS(ESI) Calculated for C<sub>10</sub>H<sub>8</sub>O<sub>2</sub>NCINa<sup>+</sup> ([M+Na]<sup>+</sup>): 232.0136, found: 232.0136.

### 5-(4-bromophenyl)-3-methyloxazol-2(3H)-one (3e)

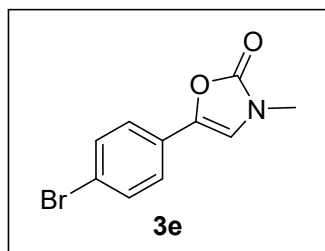

Purified by flash column chromatography (DCM/EA = 20:1) as yellow solid (42 mg, 41% yield). mp: 168-170 °C  
**<sup>1</sup>H NMR (500 MHz, CDCl<sub>3</sub>)** δ 7.59–7.45 (m, 2H), 7.40–7.29 (m, 2H), 6.76 (s, 1H), 3.31 (s, 3H). **<sup>13</sup>C NMR (125 MHz, CDCl<sub>3</sub>)** δ 155.0, 138.1, 132.0, 126.3, 124.3, 121.9, 111.0, 30.8. **HRMS(ESI)** Calculated for C<sub>10</sub>H<sub>9</sub>O<sub>2</sub>NBr<sup>+</sup> ([M+H]<sup>+</sup>): 253.9817, found: 254.0185.

### 3,4-dimethyl-5-(naphthalen-2-yl)oxazol-2(3H)-one (3f)

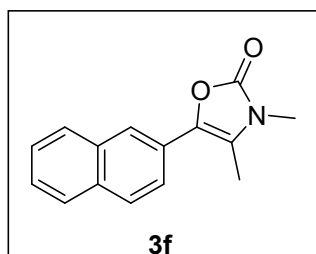

Purified by flash column chromatography (DCM/EA = 20:1) as white solid (46 mg, 48% yield). mp: 103-105 °C  
**<sup>1</sup>H NMR (500 MHz, CDCl<sub>3</sub>)** δ 7.89 (s, 1H), 7.84 – 7.78 (m, 3H), 7.58 – 7.53 (m, 1H), 7.50 – 7.44 (m, 2H), 3.20 (s, 3H), 2.30 (s, 3H). **<sup>13</sup>C NMR (125 MHz, CDCl<sub>3</sub>)** δ 155.0, 134.0, 133.2, 132.3, 128.4, 128.0, 127.6, 126.6, 126.2, 125.7, 123.6, 122.5, 119.4, 27.9, 9.4. **HRMS(ESI)** Calculated for C<sub>15</sub>H<sub>14</sub>O<sub>2</sub>NNa<sup>+</sup> ([M+Na]<sup>+</sup>): 262.0839, found: 262.0839.

## 4 Mechanistic studies

### 4.1 Radical trapping experiment

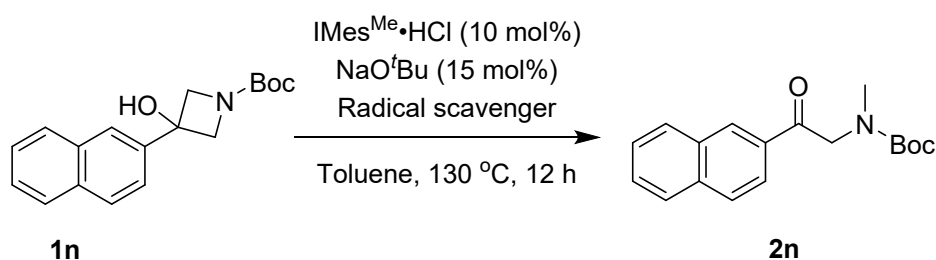

| radical scavenger   | yield/2n |
|---------------------|----------|
| TEMPO               | 30%      |
| BHT                 | 88%      |
| 1,1'-diphenylethene | 85%      |

### Experimental procedure:

To a 25 ml flame-dried Schlenk tube containing a stirring bar was added IMes<sup>Me</sup>·HCl (0.04 mmol, 14.7 mg.), NaO<sup>t</sup>-Bu (0.06 mmol, 6.0 mg), *tert*-butyl 3-hydroxy-3-(naphthalen-2-yl)azetidine-1-carboxylate **1n** (0.4 mmol, 120 mg), radical scavenger (1 equiv), toluene (1.0 mL) sequentially under nitrogen. The tube was sealed and stirred at 130 °C for 12 h. After completion, the resulting mixture was monitored by TLC and crude <sup>1</sup>H NMR analysis.

### 4.2 Deconstructive isomerization of 1B

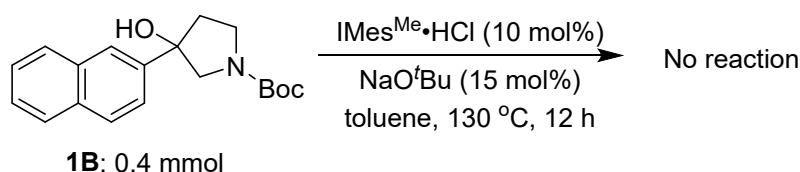

### Experimental procedure:

To a 25 ml flame-dried Schlenk tube containing a stirring bar was added IMes<sup>Me</sup>·HCl (0.04 mmol, 14.7 mg.), NaO<sup>t</sup>-Bu (0.06 mmol, 6.0 mg), *tert*-butyl 3-hydroxy-3-(naphthalen-2-yl)pyrrolidine-1-carboxylate **1B** (0.4 mmol, 120 mg), toluene (1.0 mL) sequentially under nitrogen. The tube was sealed and stirred at 130 °C for 12 h. After completion, the reaction mixture was detected by TLC and crude NMR analysis. Unfortunately, no reaction took place and the starting material was recovered.

### 4.3 Deuterium experiments

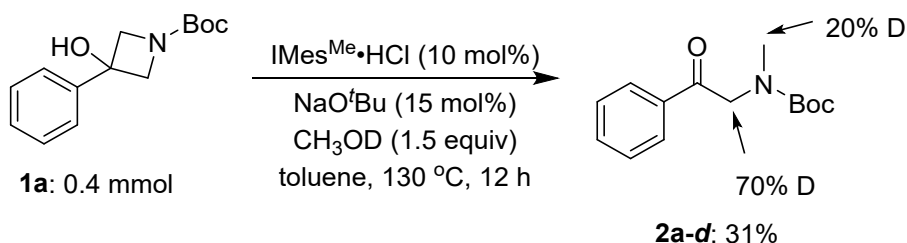

### Experimental procedure:

To a 25 ml flame-dried Schlenk tube containing a stirring bar was added IMes<sup>Me</sup>·HCl (0.04 mmol, 14.7 mg.), NaO<sup>t</sup>-Bu (0.06 mmol, 6.0 mg), *tert*-butyl 3-hydroxy-3-phenylazetidine-1-carboxylate **1a** (0.4 mmol, 120 mg), toluene (1.0 mL) and CH<sub>3</sub>OD (1.5 equiv, 19.8 mg) sequentially under nitrogen. The tube was sealed and

stirred at 130 °C for 12 h. After completion, the reaction mixture was concentrated and purified by silica gel column chromatography to provide the product **2a-D** in 31% yield.

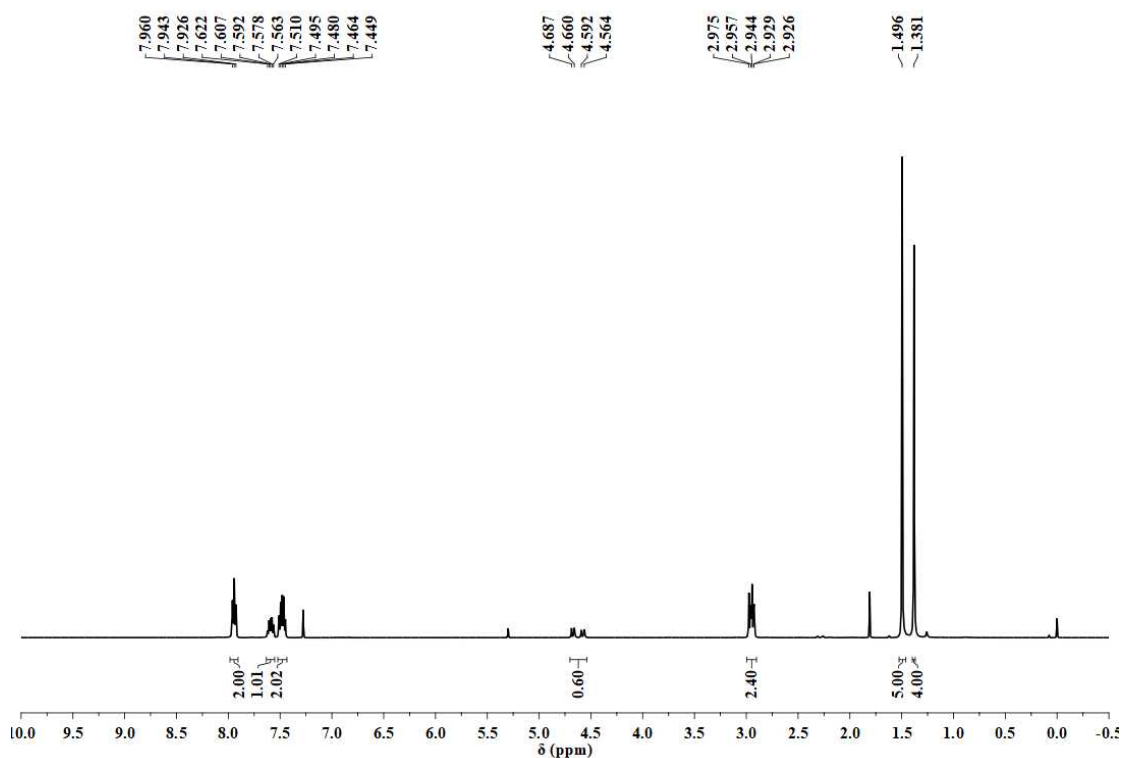

#### 4.4 Stoichiometric experiment

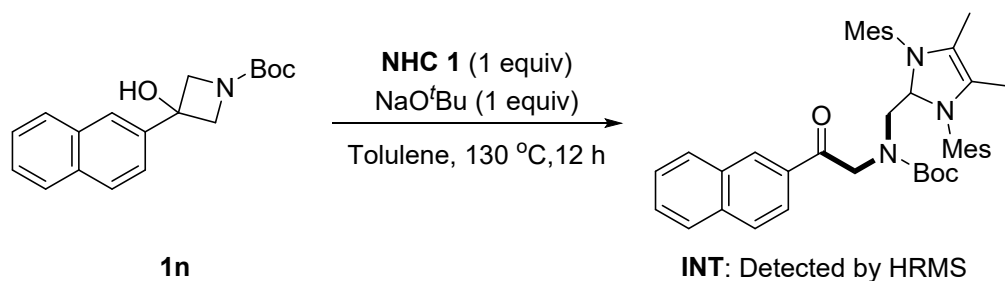

#### Experimental procedure:

To a 25 ml flame-dried Schlenk tube containing a stirring bar was added IMes<sup>Me</sup>·HCl (0.2 mmol, 75 mg.), NaO<sup>t</sup>-Bu (1.05 equiv, 20.6 mg), *tert*-butyl 3-hydroxy-3-phenylazetidine-1-carboxylate **1n** (0.2 mmol, 60 mg) and toluene (1.0 mL) sequentially under nitrogen. The tube was sealed and stirred at 130 °C for 12 h. After completion, the reaction mixture was directly subjected to HRMS analysis and the possible **INT** was detected which might be a key intermediate in the catalytic cycle.

**HRMS(ESI)** Calculated for C<sub>41</sub>H<sub>49</sub>O<sub>3</sub>N<sub>3</sub><sup>+</sup> ([M]<sup>+</sup>): 631.37684, found: 631.37195.

wz #17 RT: 0.24 AV: 1 NL: 3.69E3  
T: FTMS (1,1) + p ESI Full ms [150.00-2000.00]

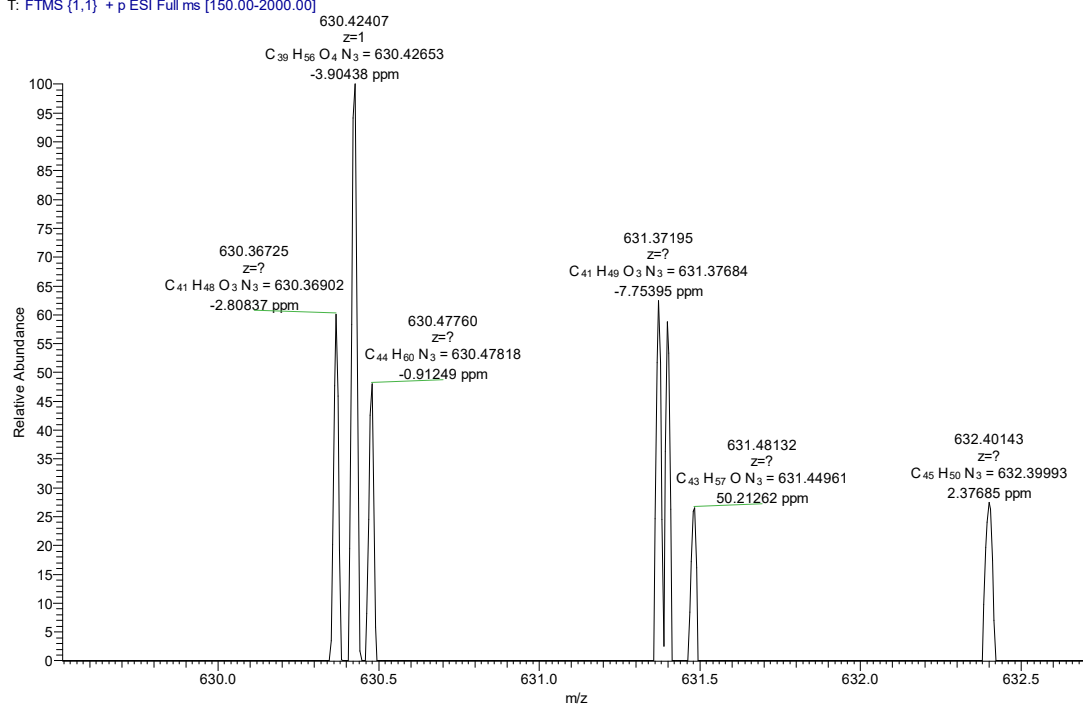

wz #17 RT: 0.24 AV: 1 NL: 2.30E3  
T: FTMS (1,1) + p ESI Full ms [150.00-2000.00]

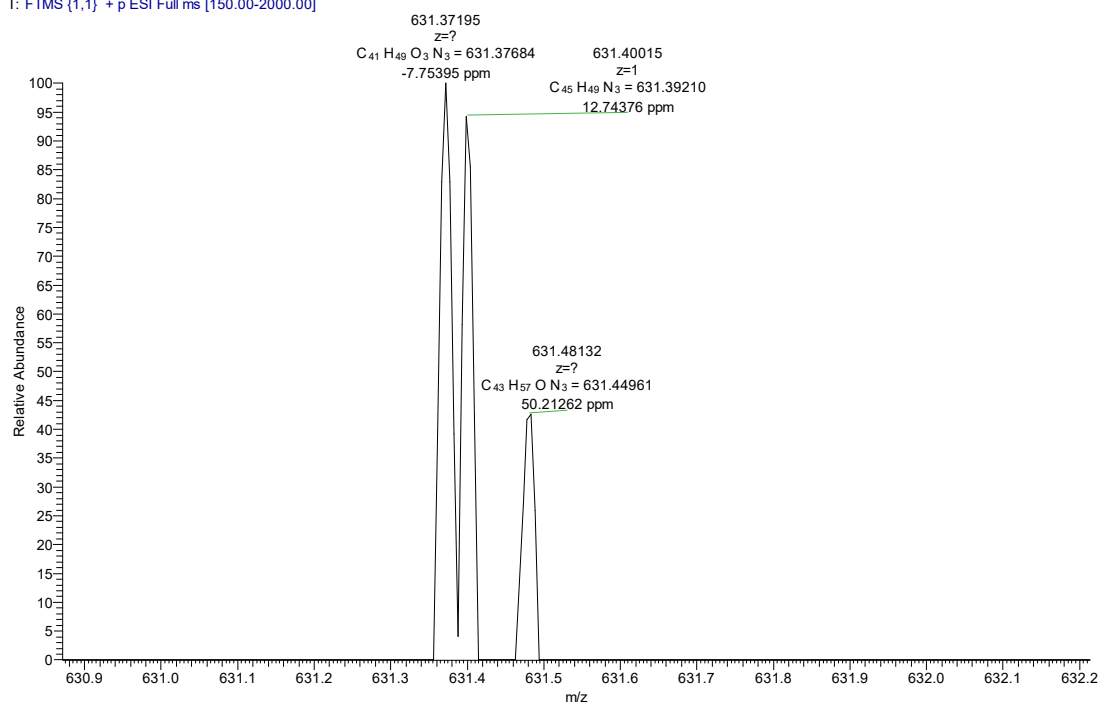

#### 4.5 Density functional theory (DFT) calculations

We also conducted the density functional theory (DFT) calculations to support the proposed mechanism of the NHC-catalyzed deconstructive isomerization of azetidinols. The free energy profile of the most favorable pathway for the reaction is

shown in [Figure 1](#). As shown, the reaction started from the catalyst–substrate complex **INT1**, and the key step is the NHC-catalyzed ring opening of azetidinols via **TS1**, which requires an activation energy of 31.8 kcal/mol. Subsequently, the formation of **2a** from **INT2** was studied computationally. For this step, three mechanistic pathways were investigated, concerted alpha-elimination via **TS4**, the NaO<sup>t</sup>Bu-mediated concerted alpha-elimination via **TS5**, and the NaO<sup>t</sup>Bu-mediated stepwise elimination pathway via **TS2** and **TS3**. The NaO<sup>t</sup>Bu-mediated stepwise elimination pathway is the most favorable pathway, which has a barrier of 30.8 kcal/mol.

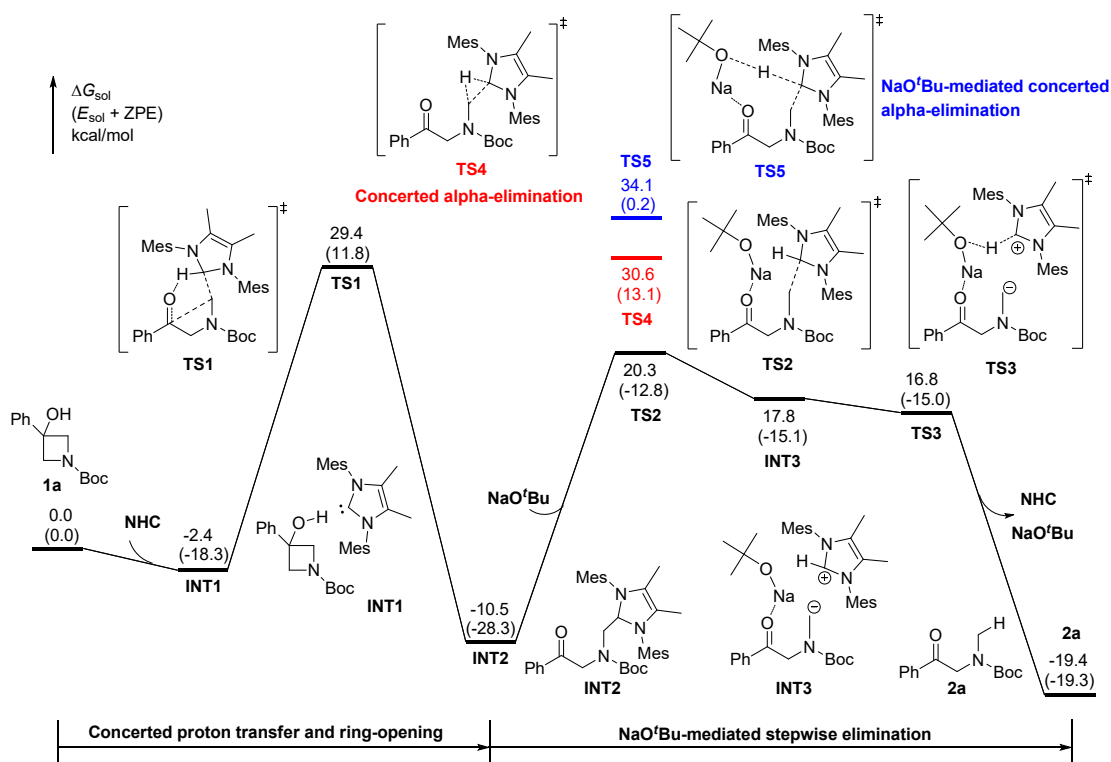

**Figure 1.** Free energy profiles for the NHC-catalyzed deconstructive isomerization of azetidinols. Calculations were carried out at the M06-2X/6-311++G(2df,2pd)-IEFPCM<sub>toluene</sub>//M06-2X/6-31G(d,p)-IEFPCM<sub>toluene</sub> level of theory.

## 5. Synthetic Applications

### 5.1 Gram-scale reaction

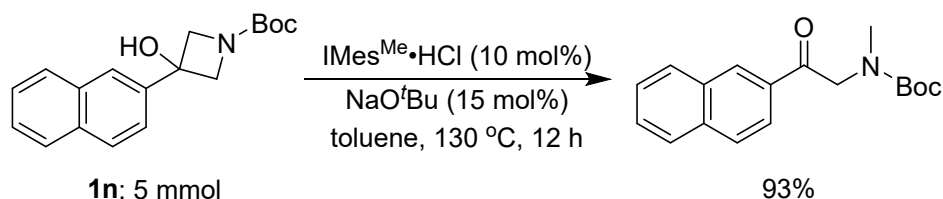

#### Experimental procedure:

To a 100 ml flame-dried Schlenk tube containing a stirring bar was added  $\text{IMes}^{\text{Me}}\cdot\text{HCl}$  (0.5 mmol, 185 mg.),  $\text{NaOt-Bu}$  (0.75 mmol, 73.5 mg), *tert*-butyl 3-hydroxy-3-(naphthalen-2-yl)azetidine-1-carboxylate **1n** (5 mmol, 1495 mg), toluene (12.5 mL) sequentially under nitrogen. The tube was sealed and stirred at 130 °C for 12 h. After completion, the reaction mixture was concentrated and purified by silica gel column chromatography (PE/EA = 20:1 to 8:1) to provide the product **2n** in 93% yield (1.39 g).

### 5.2 Transformation of $\alpha$ -amino ketone

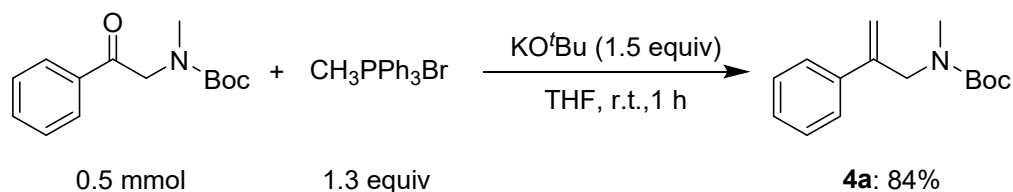

#### Experimental procedure<sup>7</sup>:

Under  $\text{N}_2$ , to a solution of methyl triphenylphosphonium bromide (0.65 mmol) in anhydrous THF (2 mL) was added  $\text{KO}^t\text{Bu}$  (0.75 mmol) and stirred at room temperature for 30 min. A solution of **2a** (0.50 mmol, 125 mg) in anhydrous THF (1.0 mL) was added dropwise to the yellow suspension and the mixture was stirred for another 1 h at room temperature. After completion, the reaction mixture was diluted with ethyl acetate (5.0 mL) and filtered through a short pad silica gel washing with ethyl acetate (10 mL). The filtrate was concentrated and purified by silica gel column chromatography to provide the product *tert*-butyl methyl(2-phenylallyl)carbamate (**4a**) as a colorless oil. (104 mg, 84% yield). The NMR data are consistent with previously reported literature.<sup>8</sup>

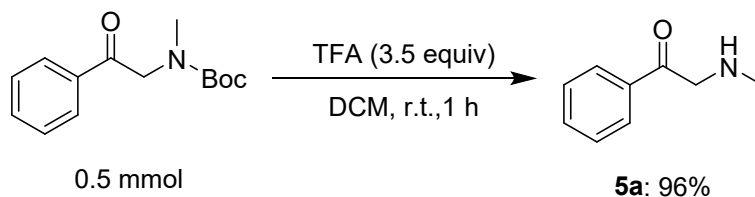

#### Experimental procedure<sup>5</sup>:

To a solution of **2a** (0.50 mmol, 125 mg) in DCM (2.0 mL) was added TFA (1.75 mmol, 199.5 mg) dropwise. The reaction mixture was stirred for 1 h at room temperature. Then, the mixture was basified with NaHCO<sub>3</sub> (aq) to pH≈8 and extracted with DCM (3×5 mL). The combined organic phases were dried over anhydrous Na<sub>2</sub>SO<sub>4</sub>. Then, the mixture was filtered through a short pad silica gel washing with ethyl acetate (20 mL). Organic phases concentrated in vacuo to afford 2-(methylamino)-1-phenylethan-1-one (**5a**) as a yellow oil (72 mg, 96% yield). The NMR data are consistent with previously reported literature.<sup>9</sup>

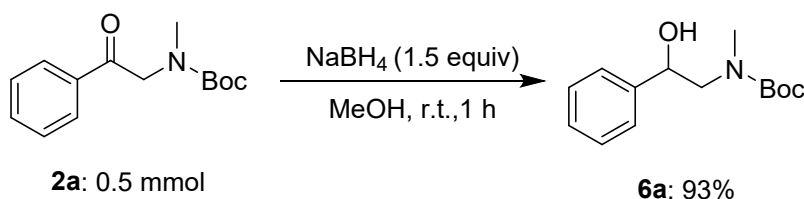

#### Experimental procedure<sup>5</sup>:

To a solution of **2a** (0.50 mmol, 125 mg) in MeOH (1.0 mL) was added NaBH<sub>4</sub> (0.75 mmol, 28.4 mg) at 0 °C, and stirred at room temperature for 1 h. The mixture was evaporated to remove MeOH, and diluted with EA. The organic layer was washed with brine, dried over anhydrous Na<sub>2</sub>SO<sub>4</sub>, filtered, and evaporated. The crude residue was purified by column chromatography on silica gel to afford *tert*-butyl (2-hydroxy-2-phenylethyl)(methyl)carbamate (**4b**) as a colorless oil (117 mg, 93% yield). The NMR data are consistent with previously reported literature.<sup>9</sup>

## 6. References

- [1] Raclea, R.-C.; Natho, P.; Allen, L. A. T.; White, A. J. P.; Parsons, P. J. *J. Org. Chem.* **2020**, *85*, 9375.
- [2] Reiners, F.; Joseph, E.; Nißl, B.; Didier, D. *Org. Lett.* **2020**, *22*, 8533.
- [3] Boiteau, J.-G.; Rodeville, N.; Martin, C.; Tabet, S.; Moureou, C.; Muller, F.; Jetha, J.-C.; Cardinaud, I. *Org. Process. Res. Dev.* **2015**, *19*, 646.
- [4] Du, H.-J.; Zhen, L.; Wen, X.; Xu, Q.-L.; Sun, H. *Org. Biomol. Chem.* **2014**, *12*, 9716.
- [5] Goliszewska, K.; Rybicka-Jasińska, K.; Szurmak, J.; Gryko, D. *J. Org. Chem.* **2019**, *84*, 15834.
- [6] Ruggeri, M.; Dombrowski, A. W.; Djuric, S. W.; Baxendale, I. R. *ChemPhotoChem* **2019**, *3*, 1212.
- [7] Hu, X. E.; Kim, N. K.; Ledoussal, B. *Org. Lett.* **2002**, *4*, 4499.
- [8] Cabré, A.; Sciortino, G.; Ujaque, G.; Verdaguer, X.; Lledós, A.; Riera, A. *Org. Lett.* **2018**, *20*, 5747.
- [9] Prasad, P. K.; Reddi, R. N.; Sudalai, A. *Org. Lett.* **2016**, *18*, 500.

## 7. $^1\text{H}$ and $^{13}\text{C}$ NMR Spectra

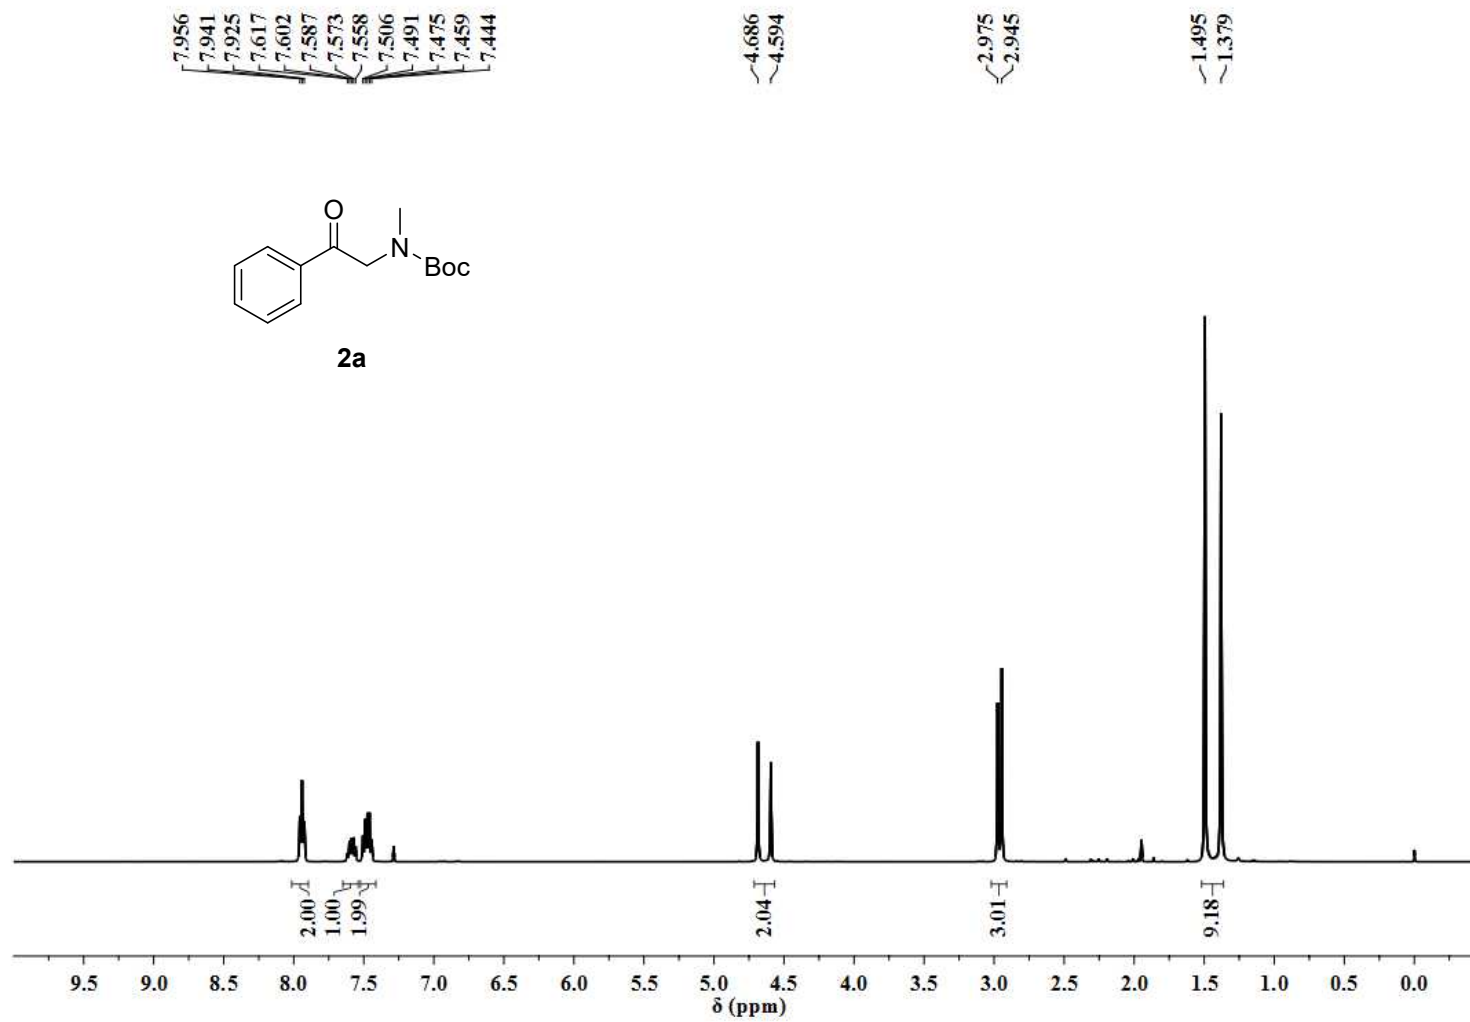

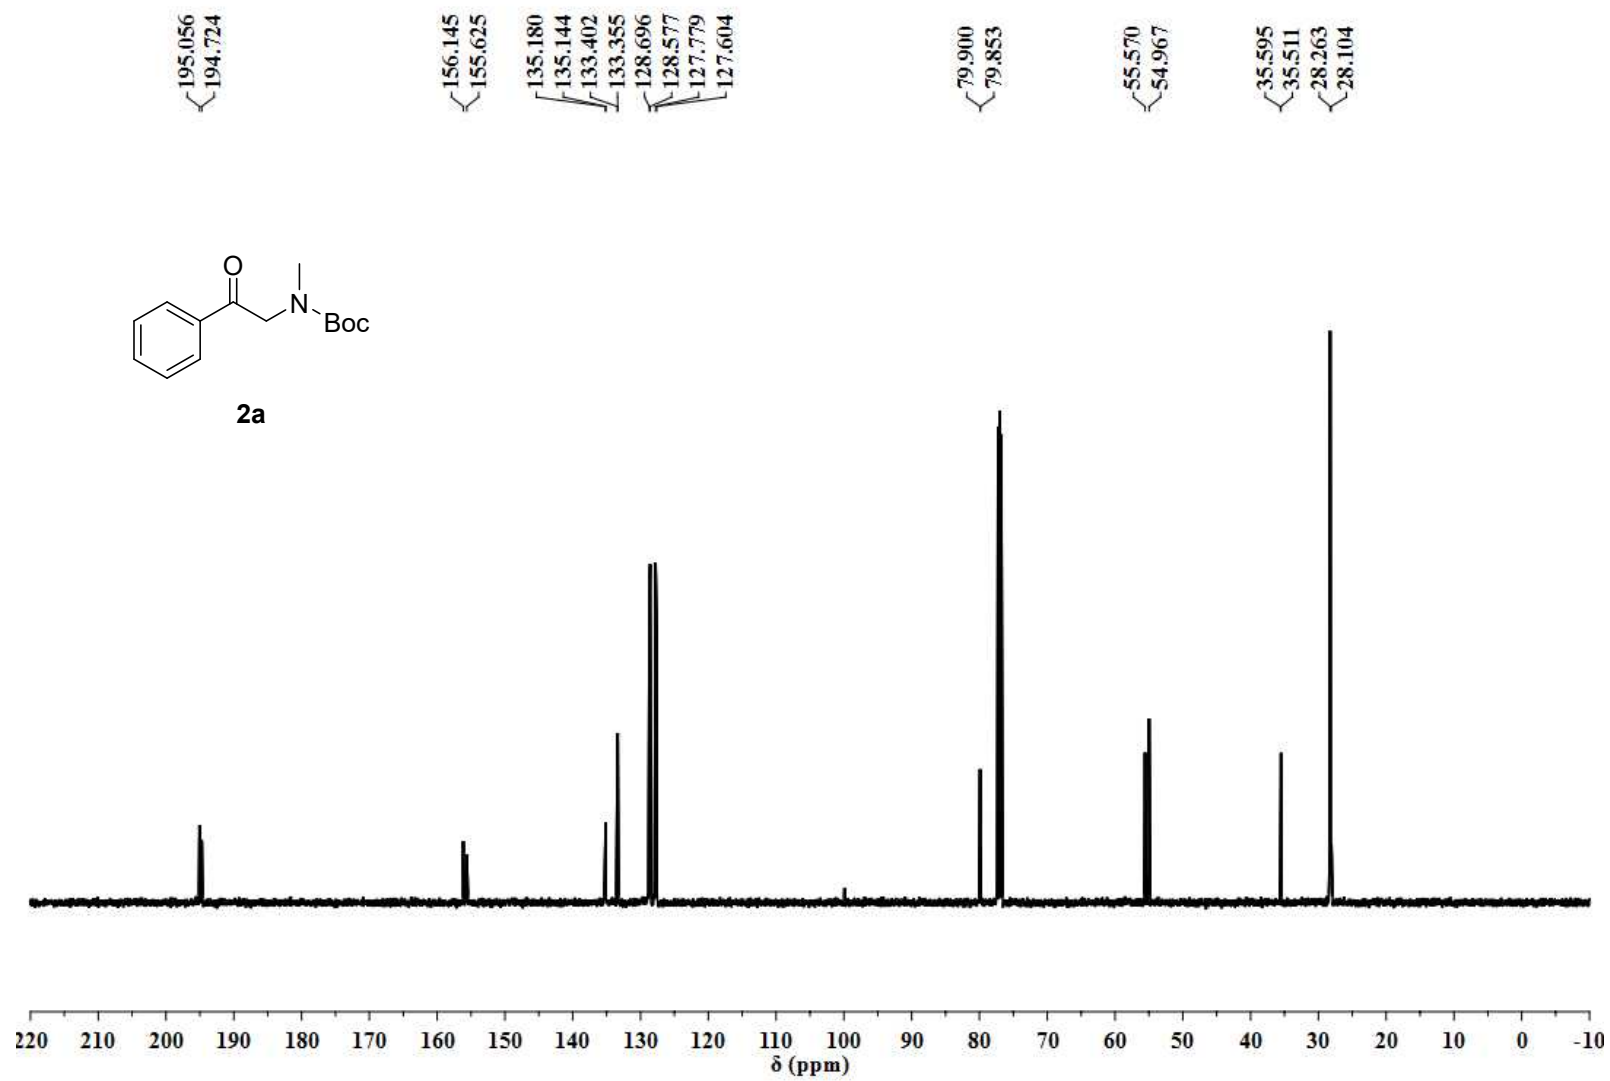

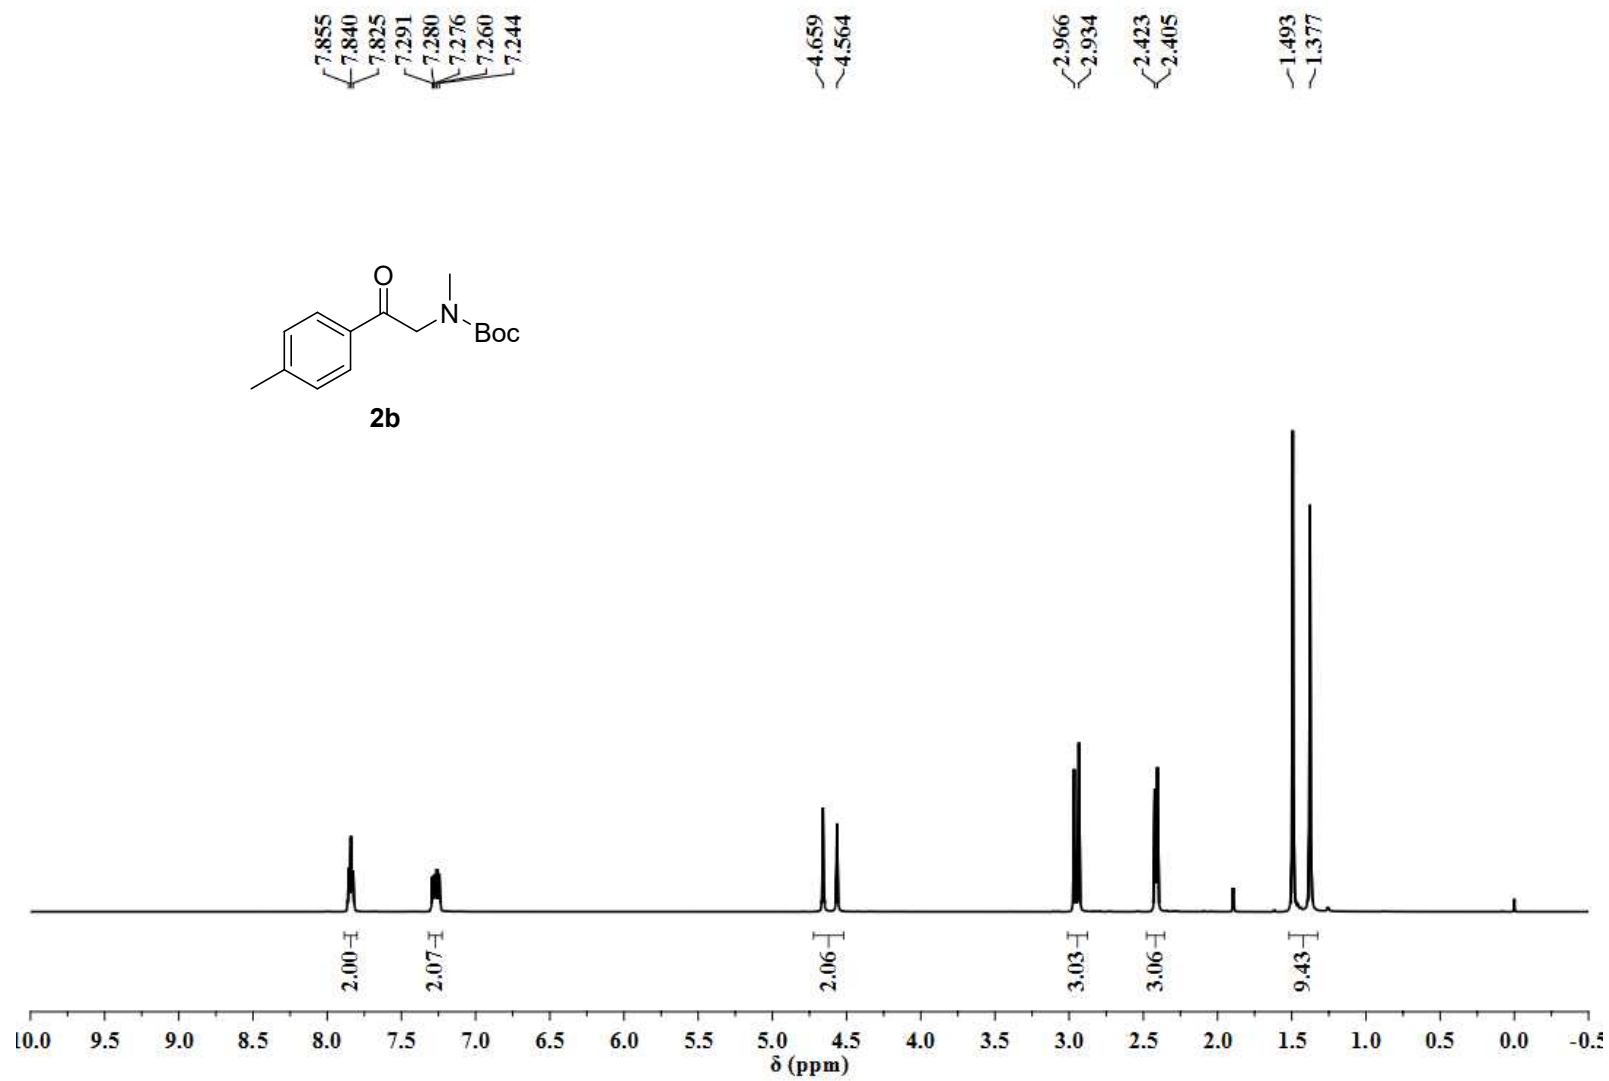

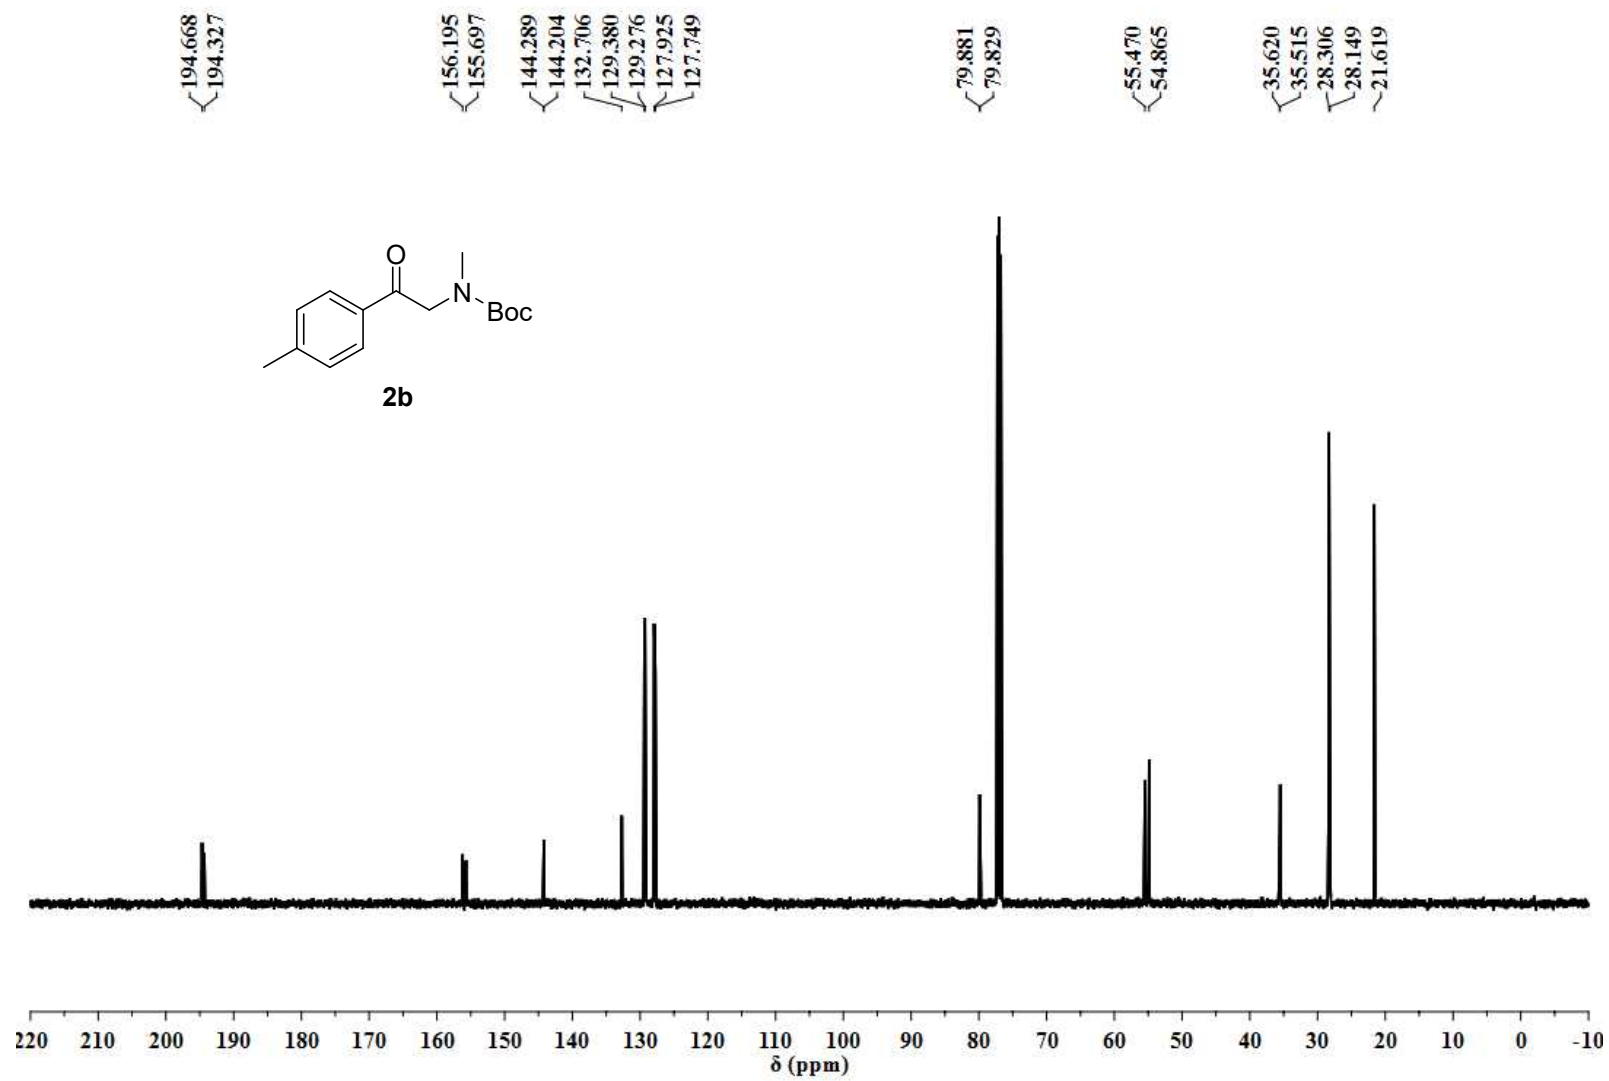

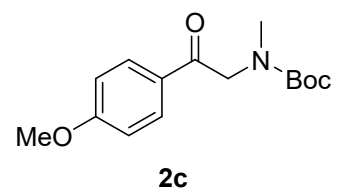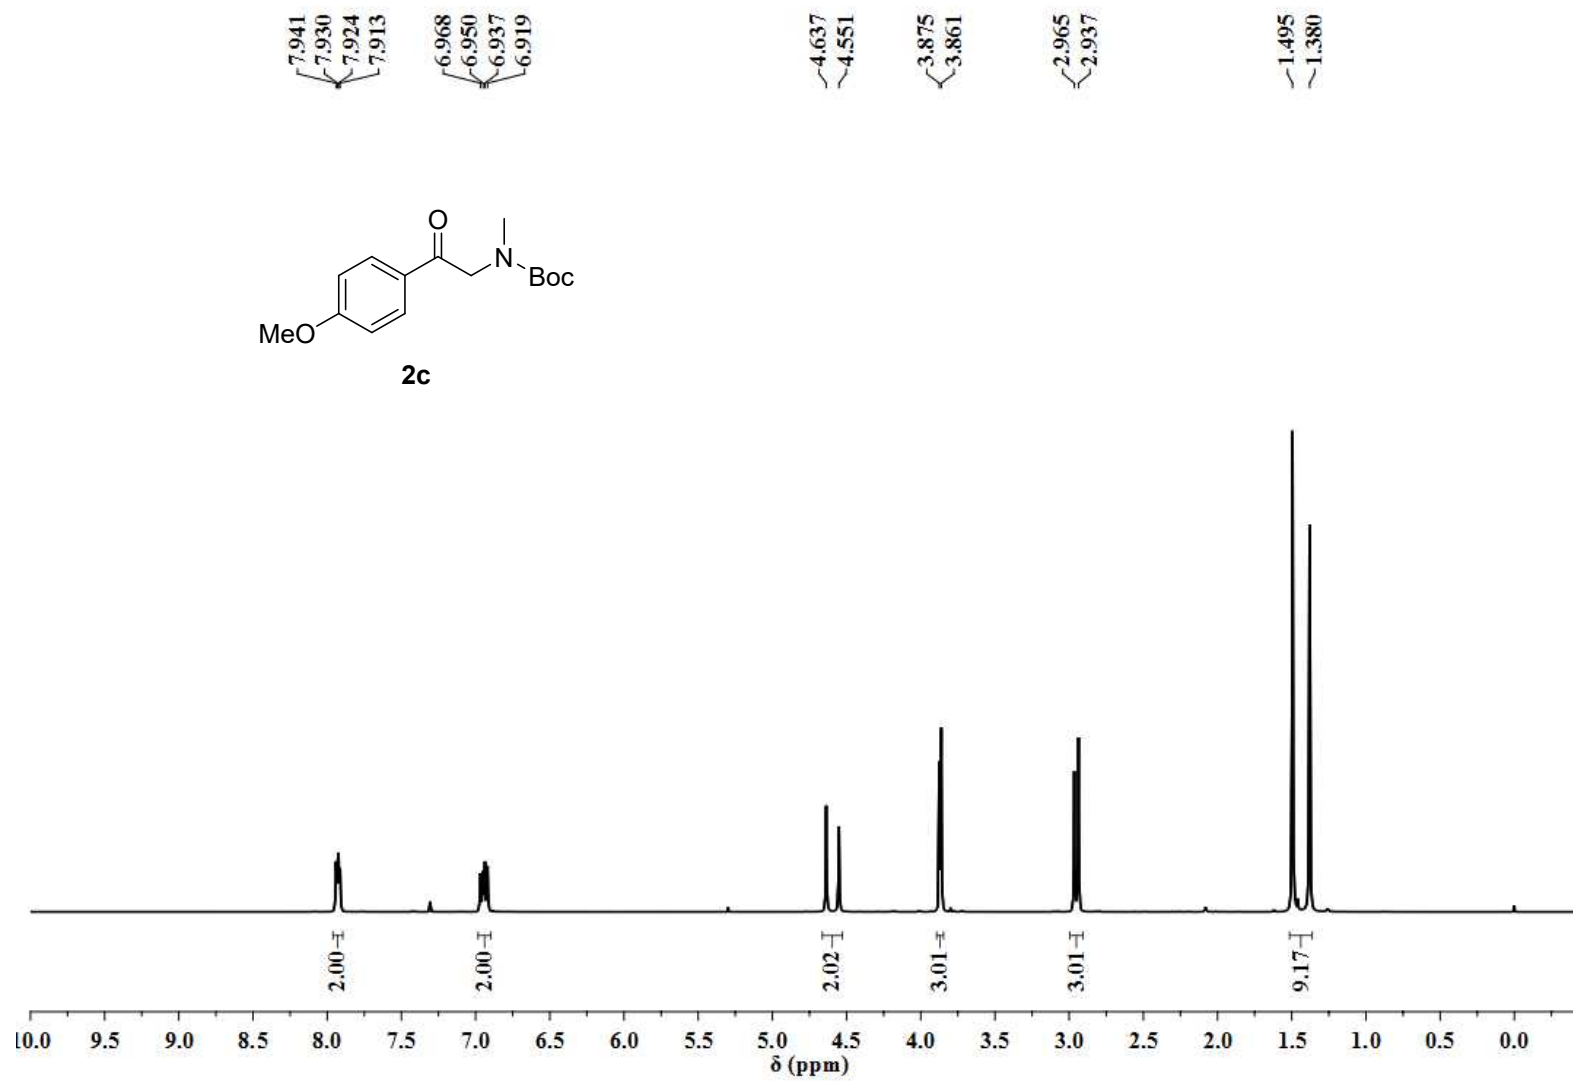

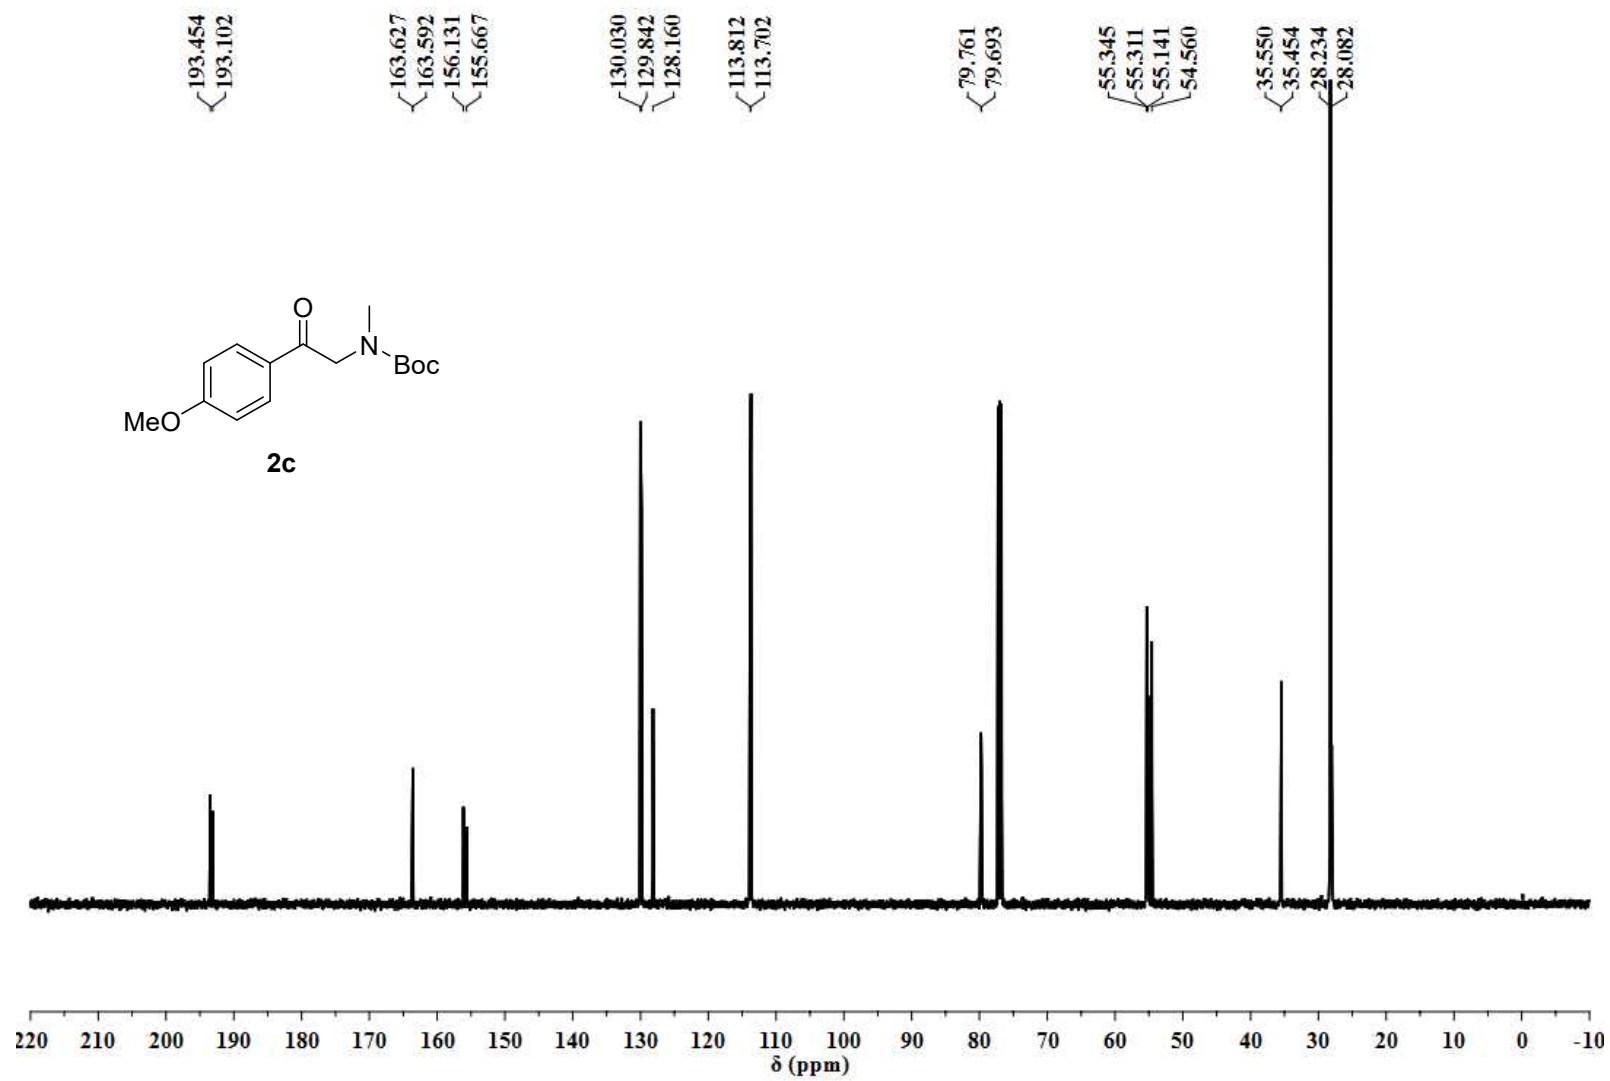

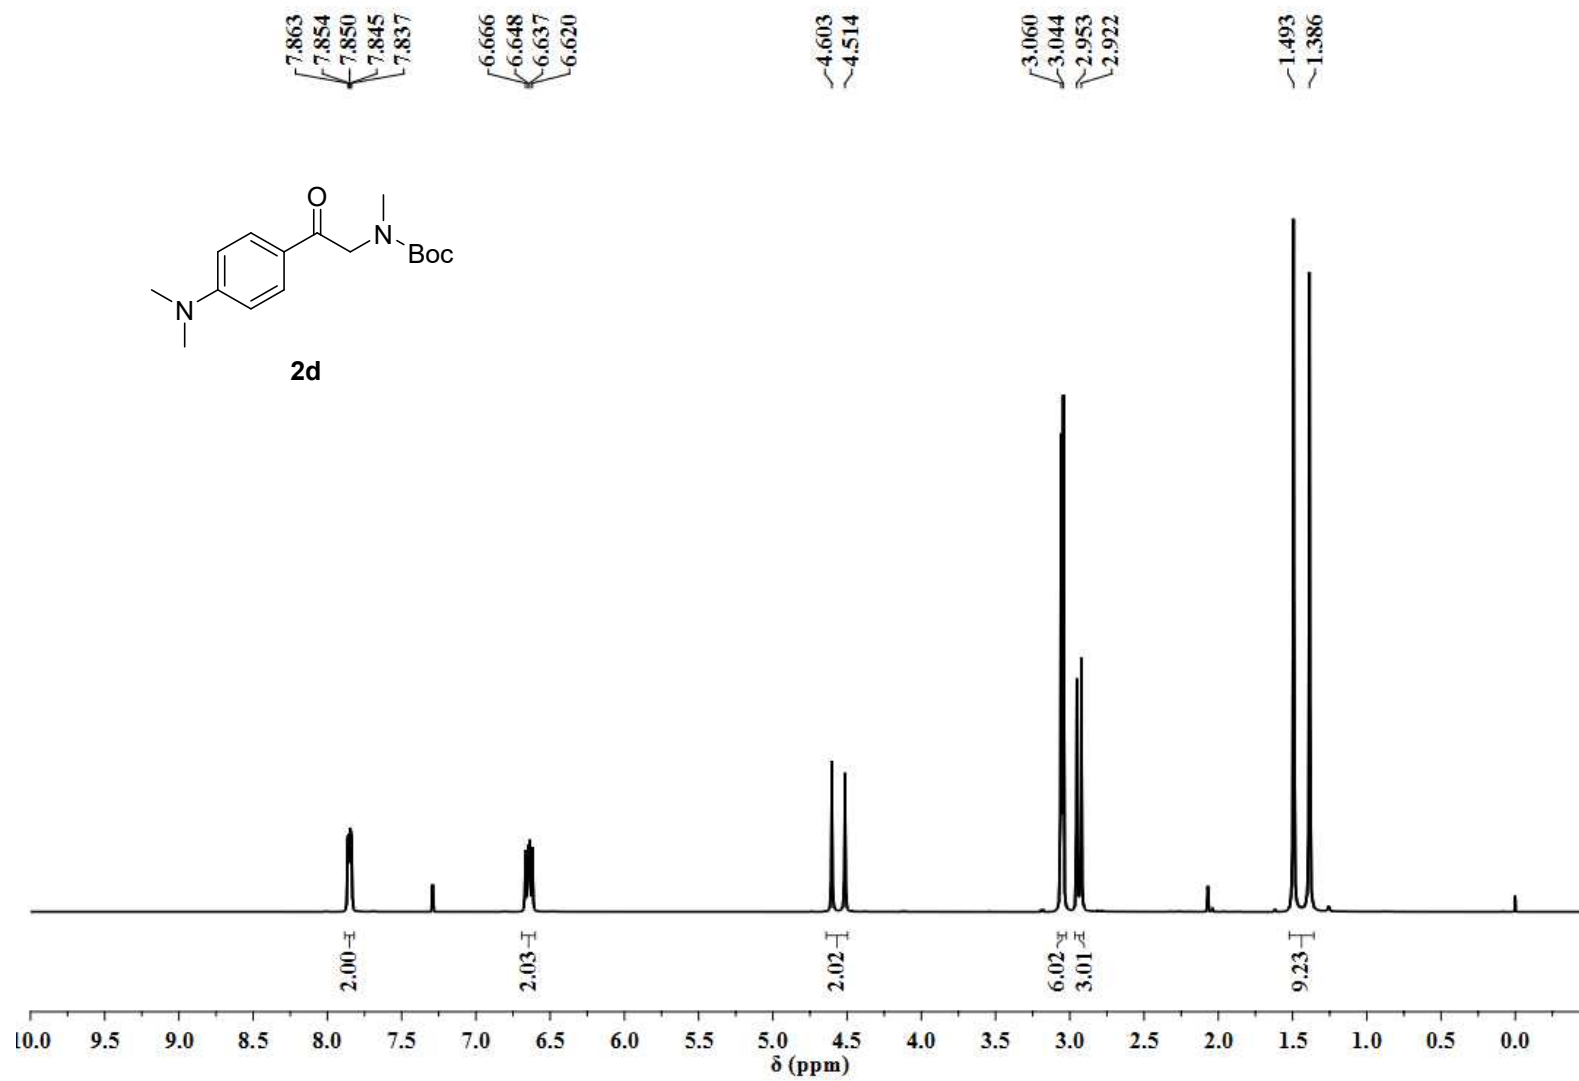

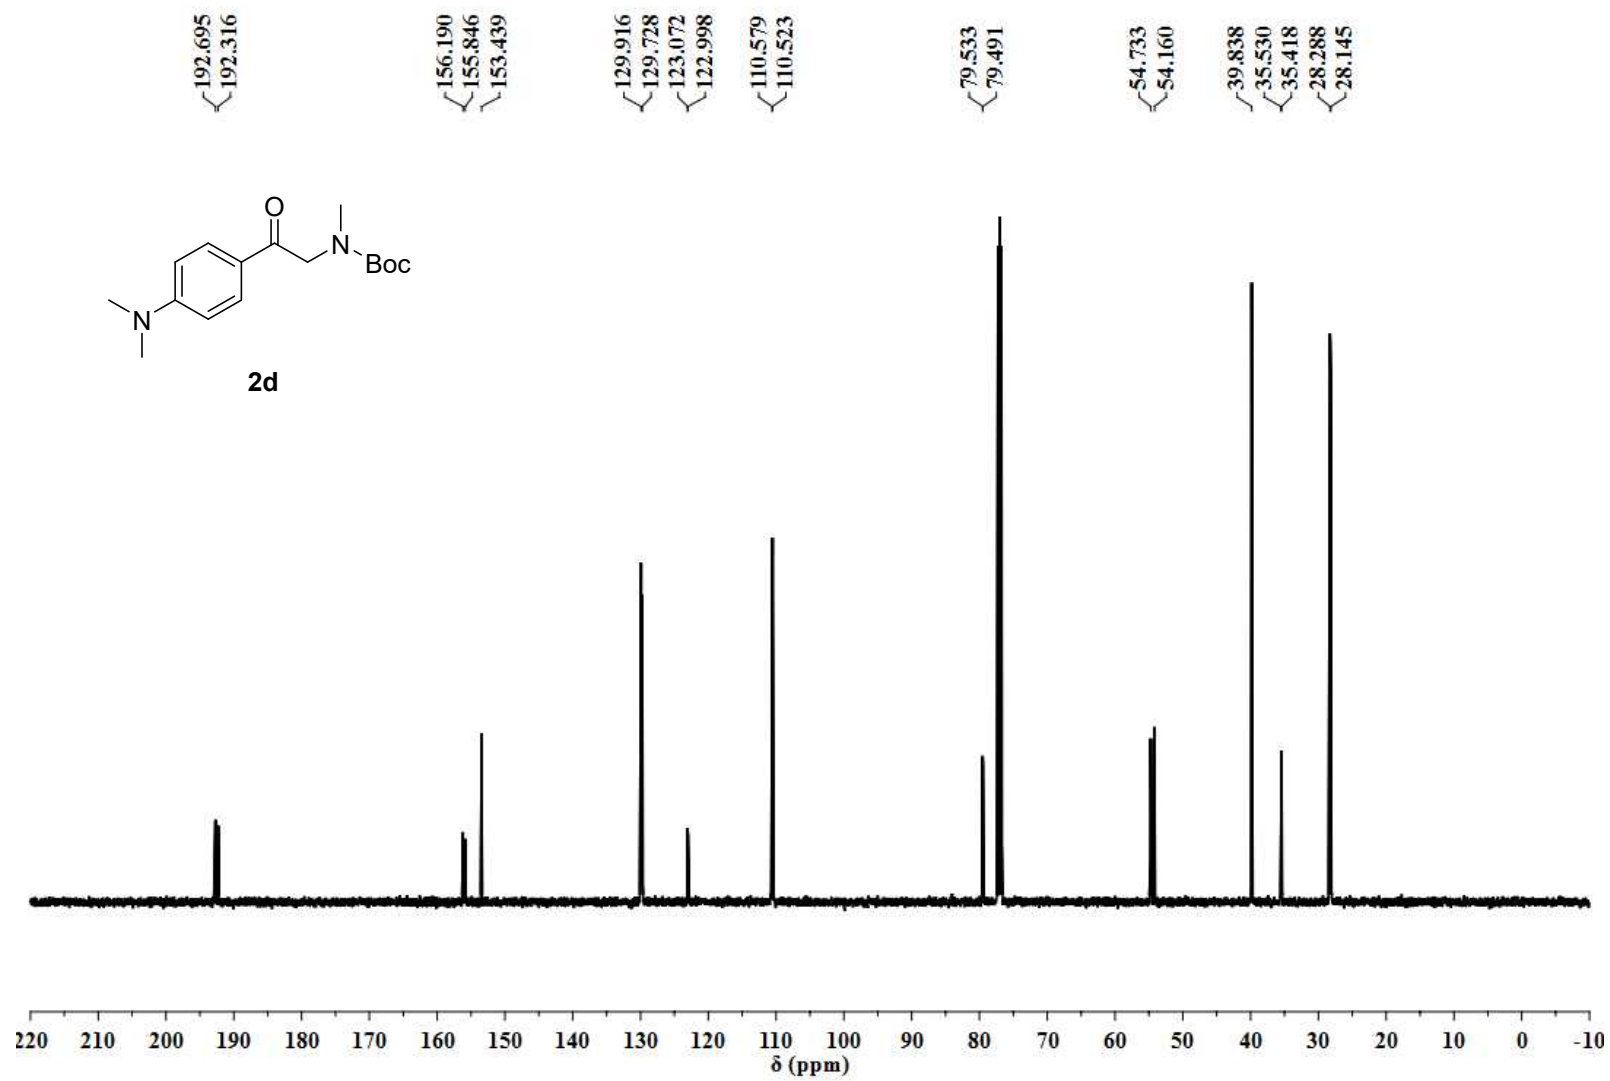

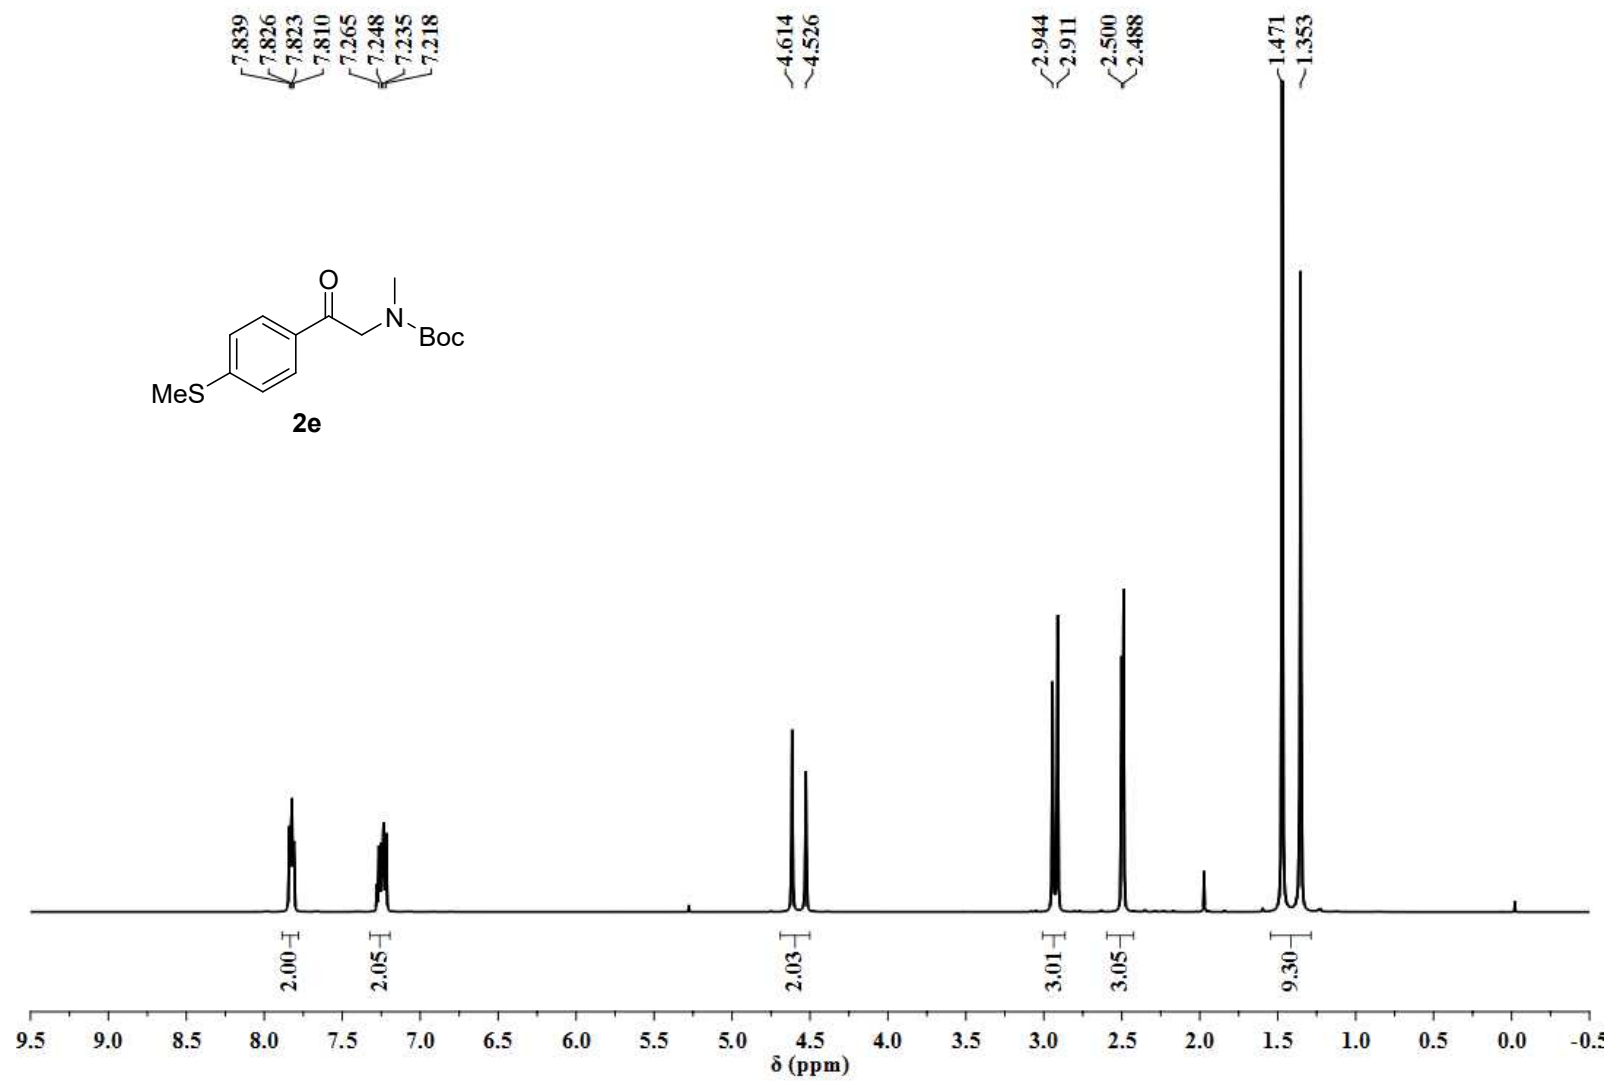

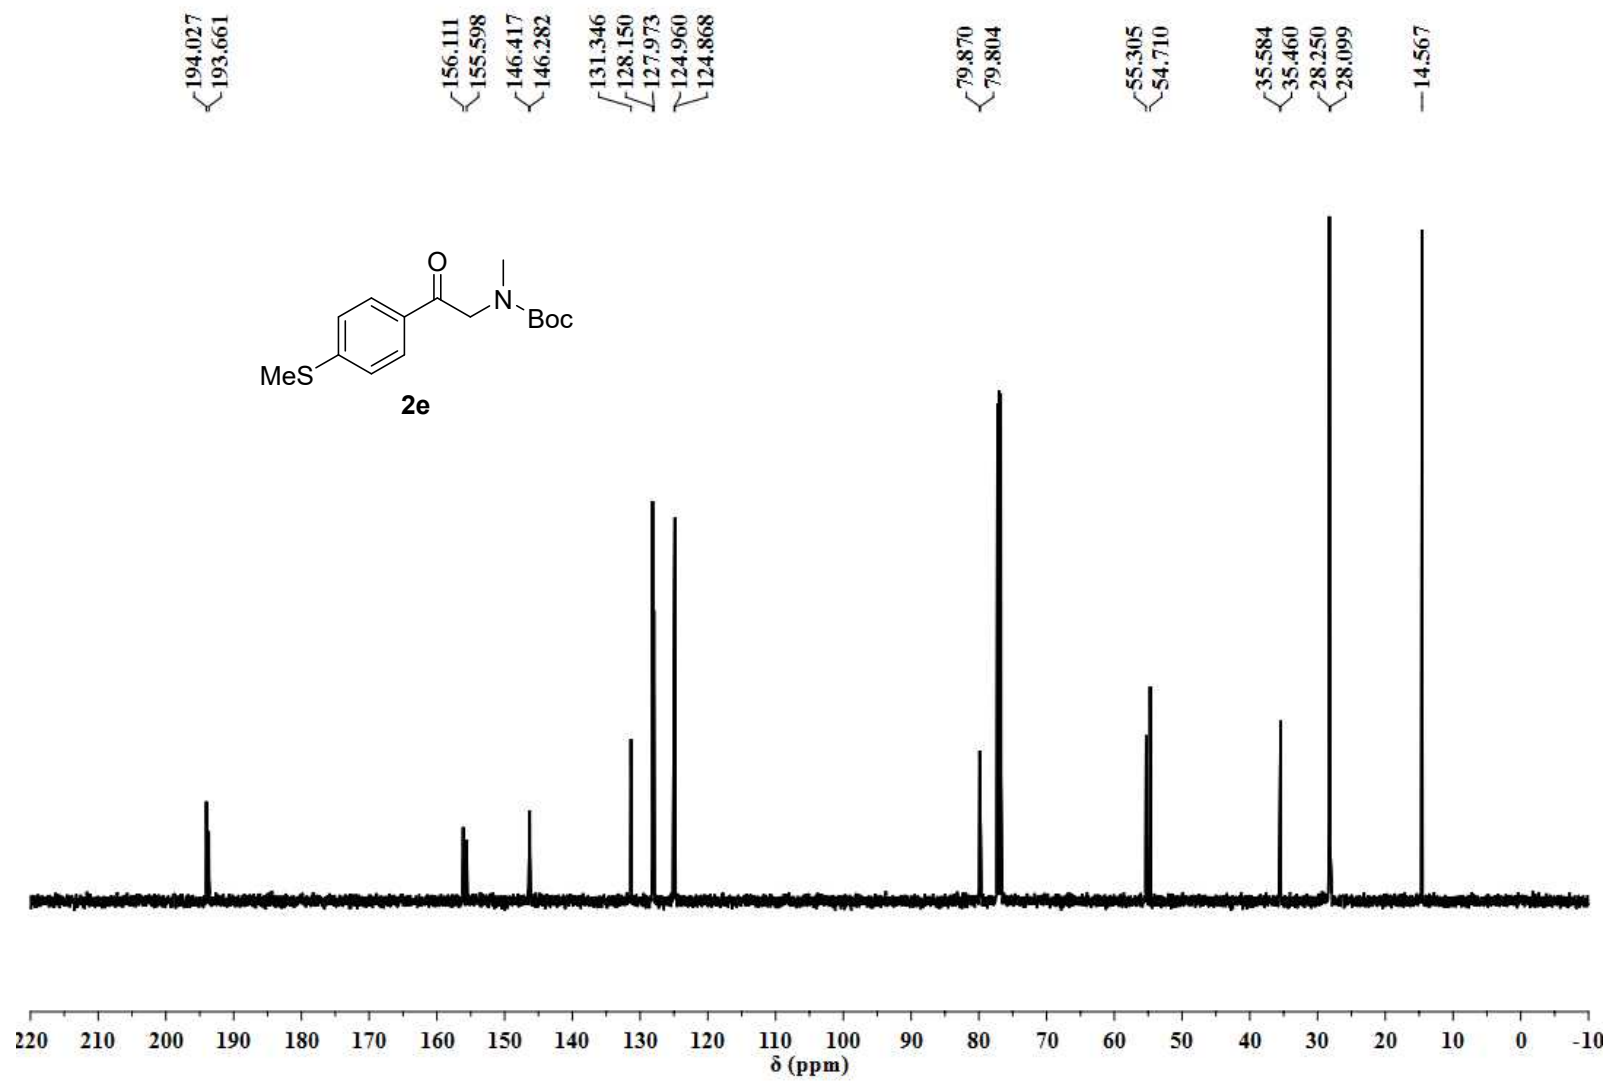

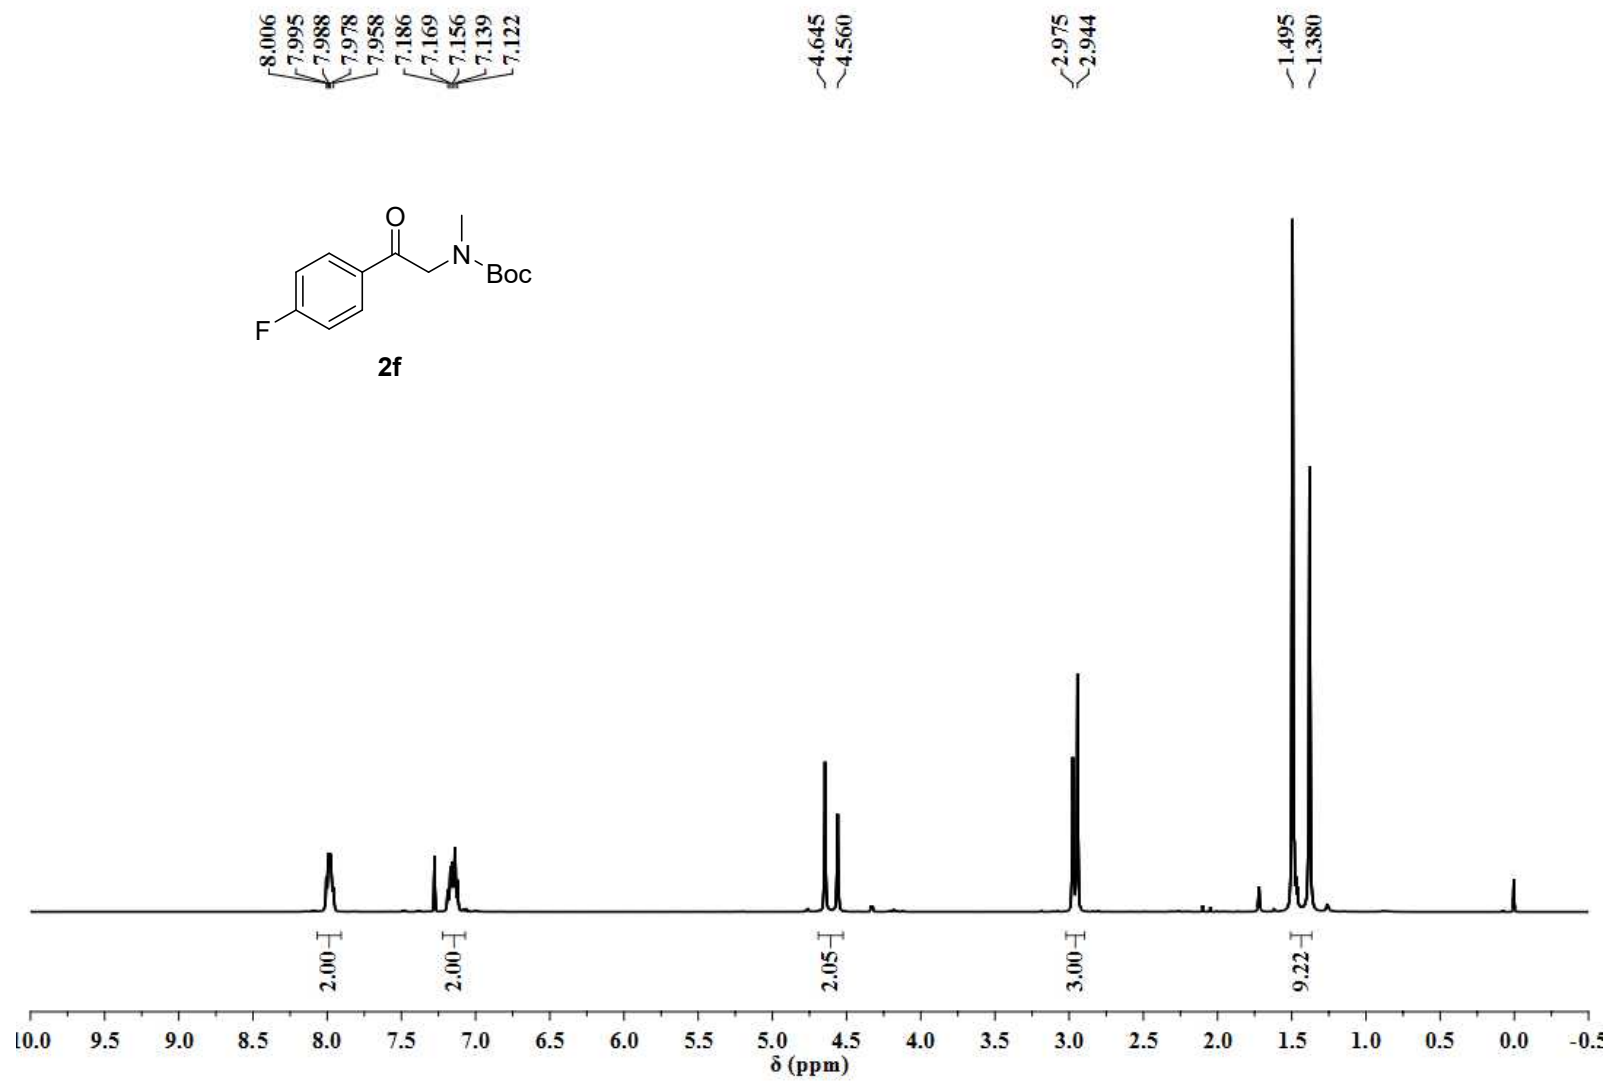

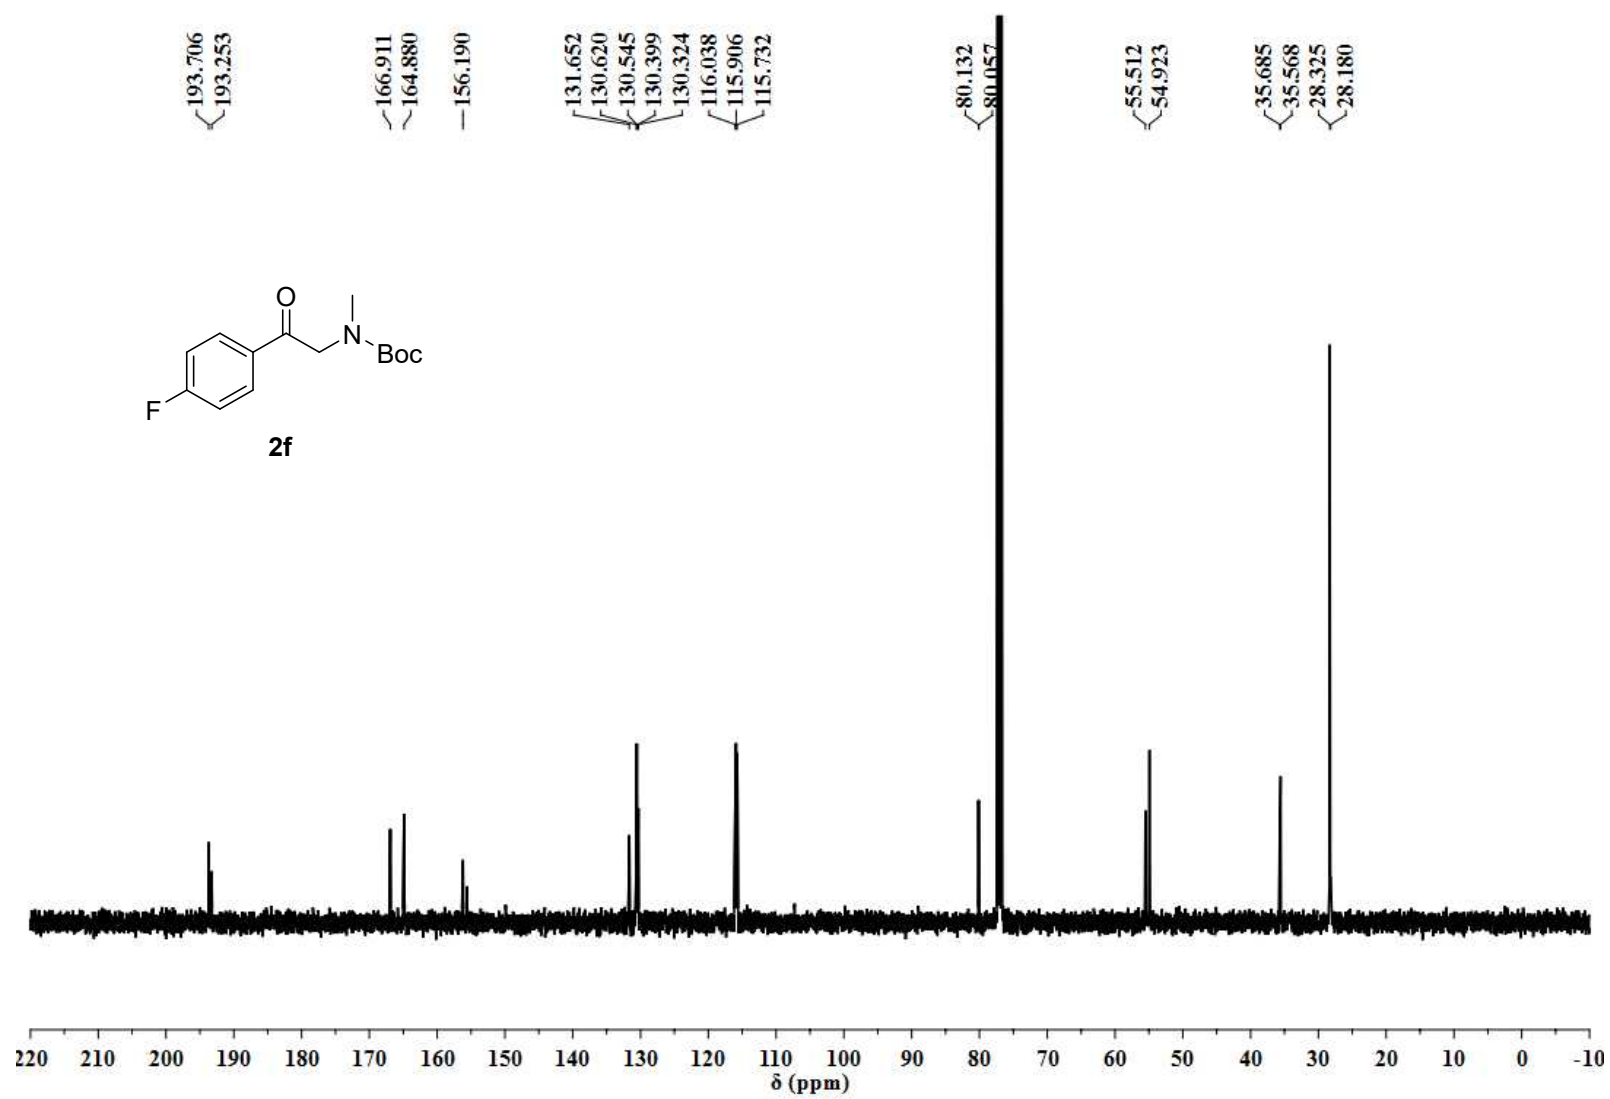

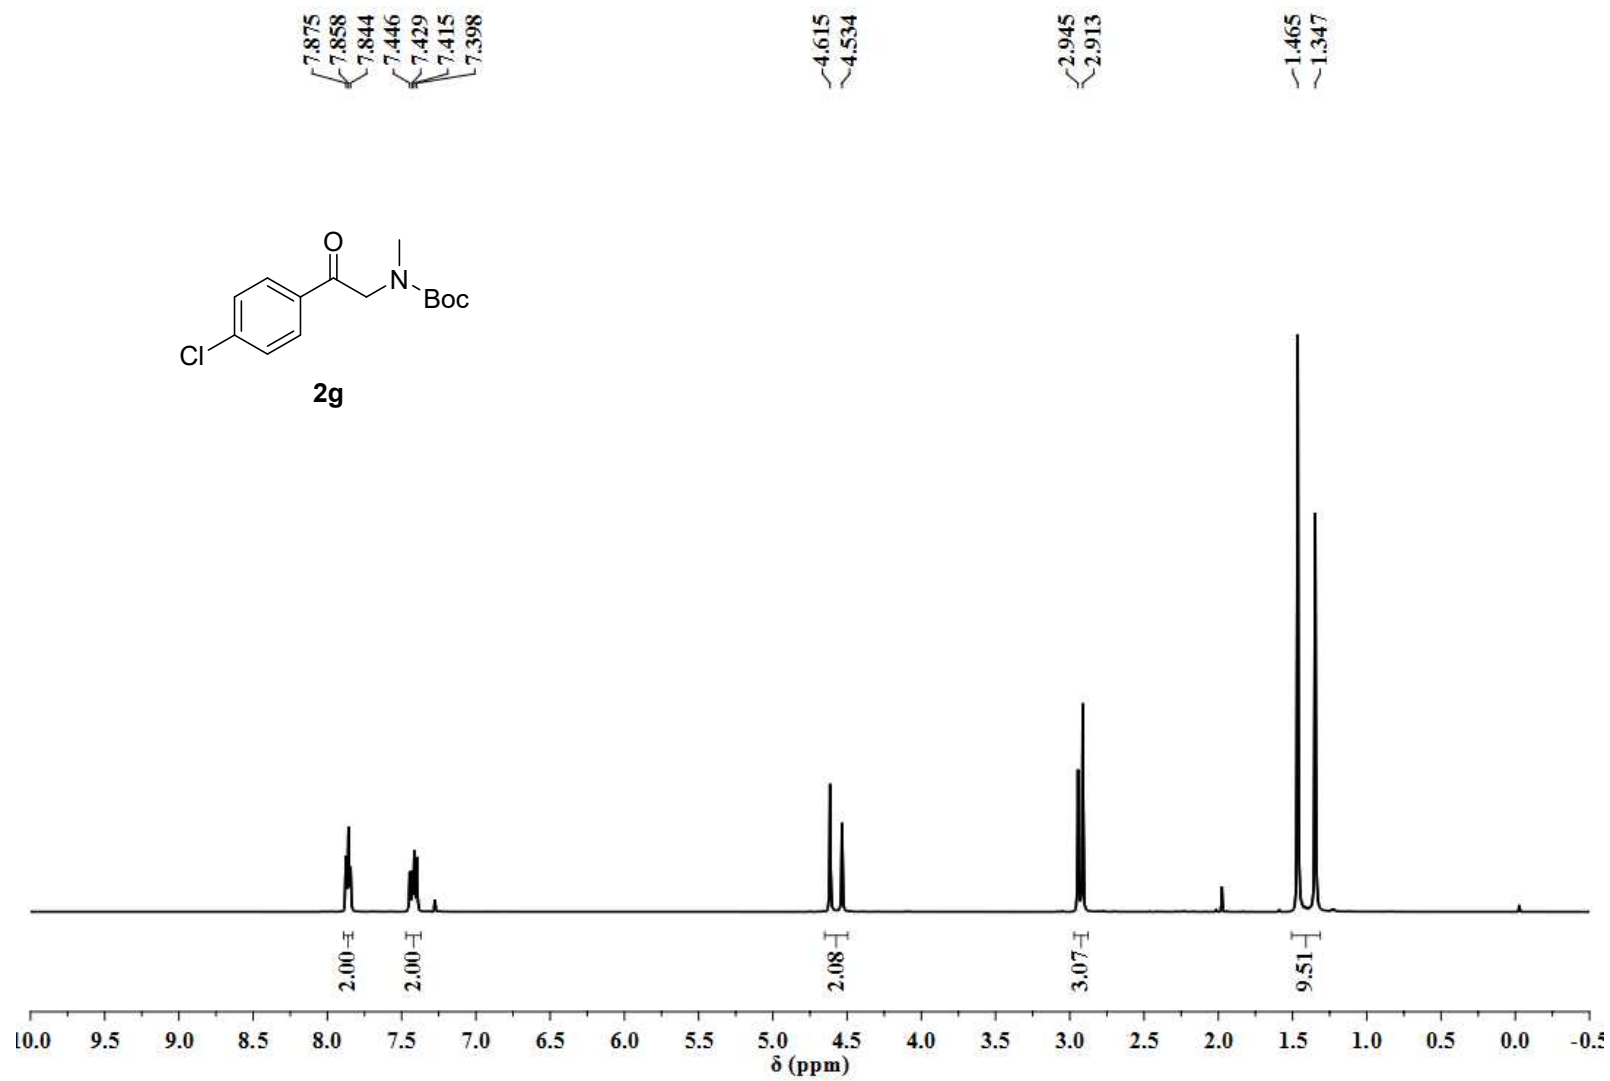

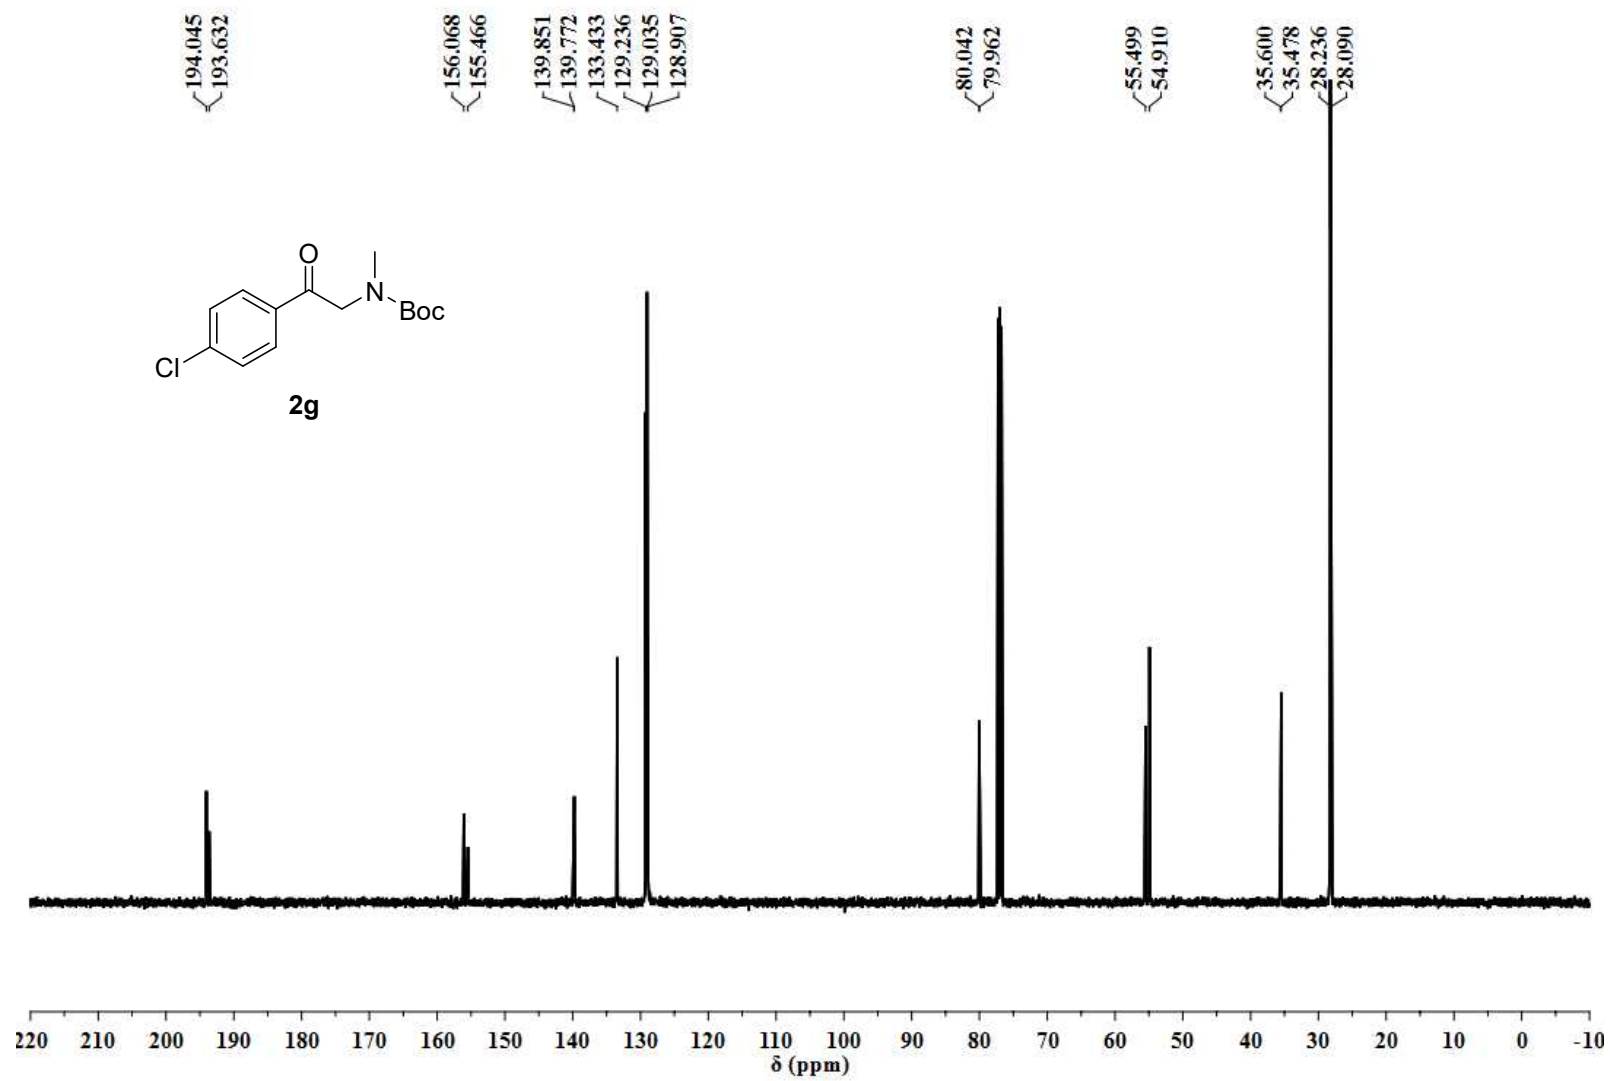

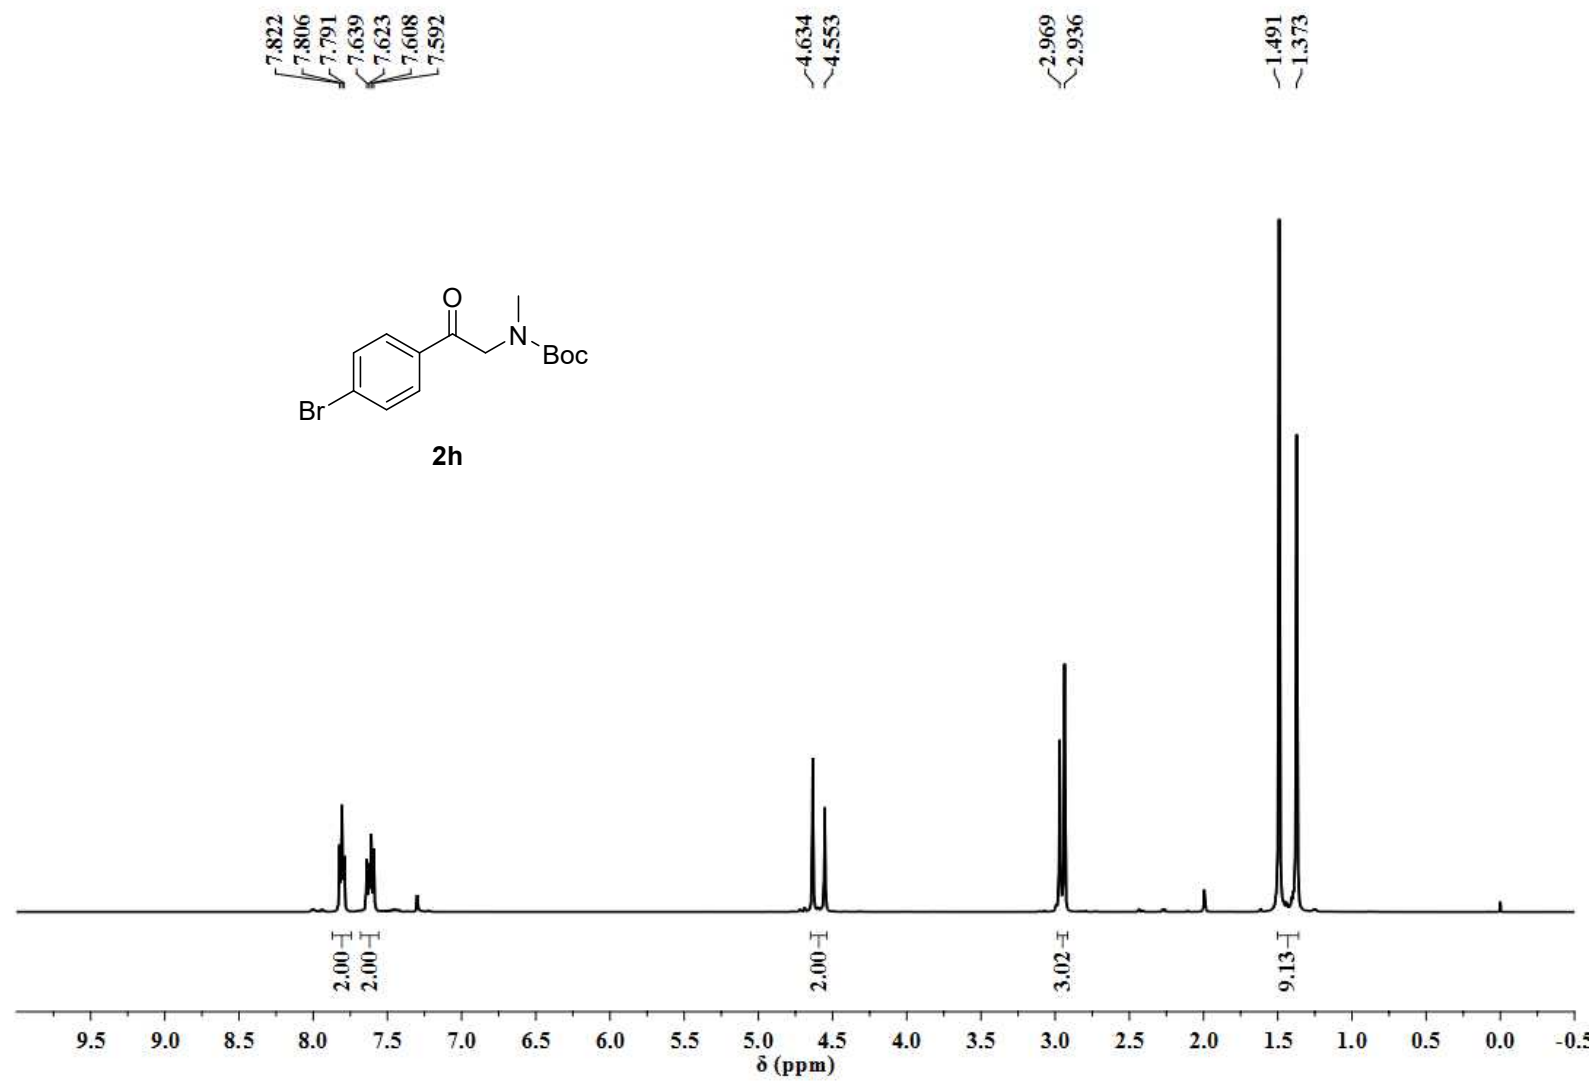

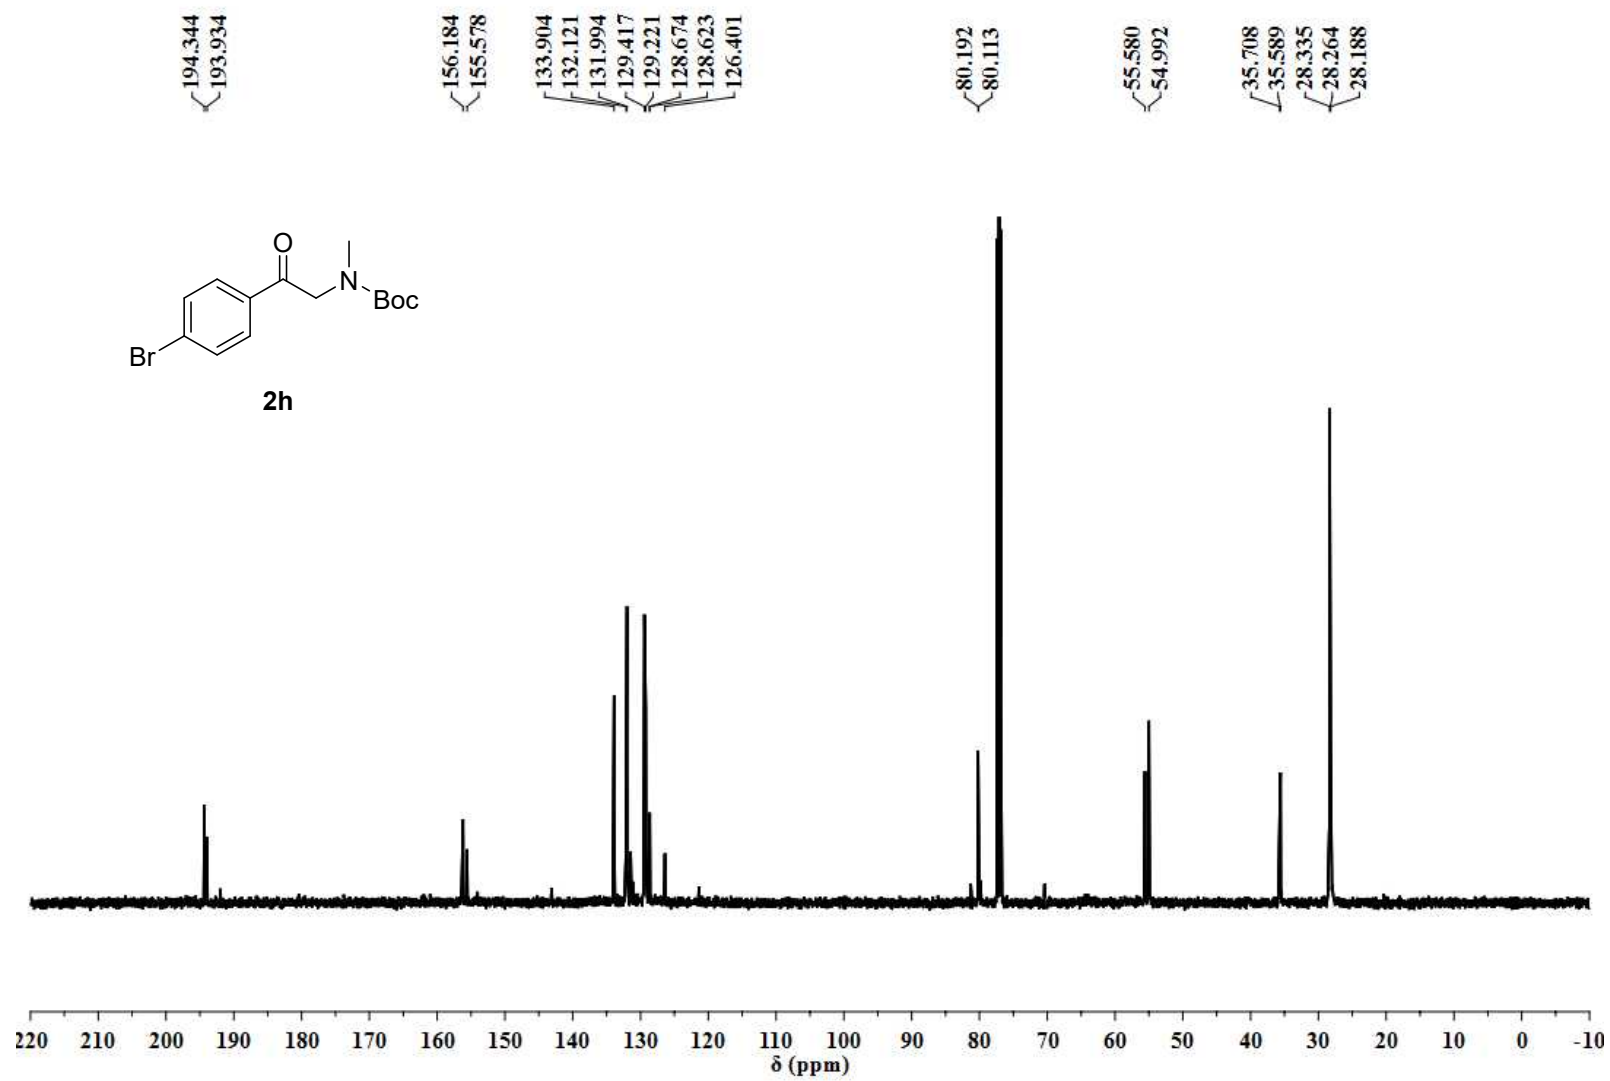

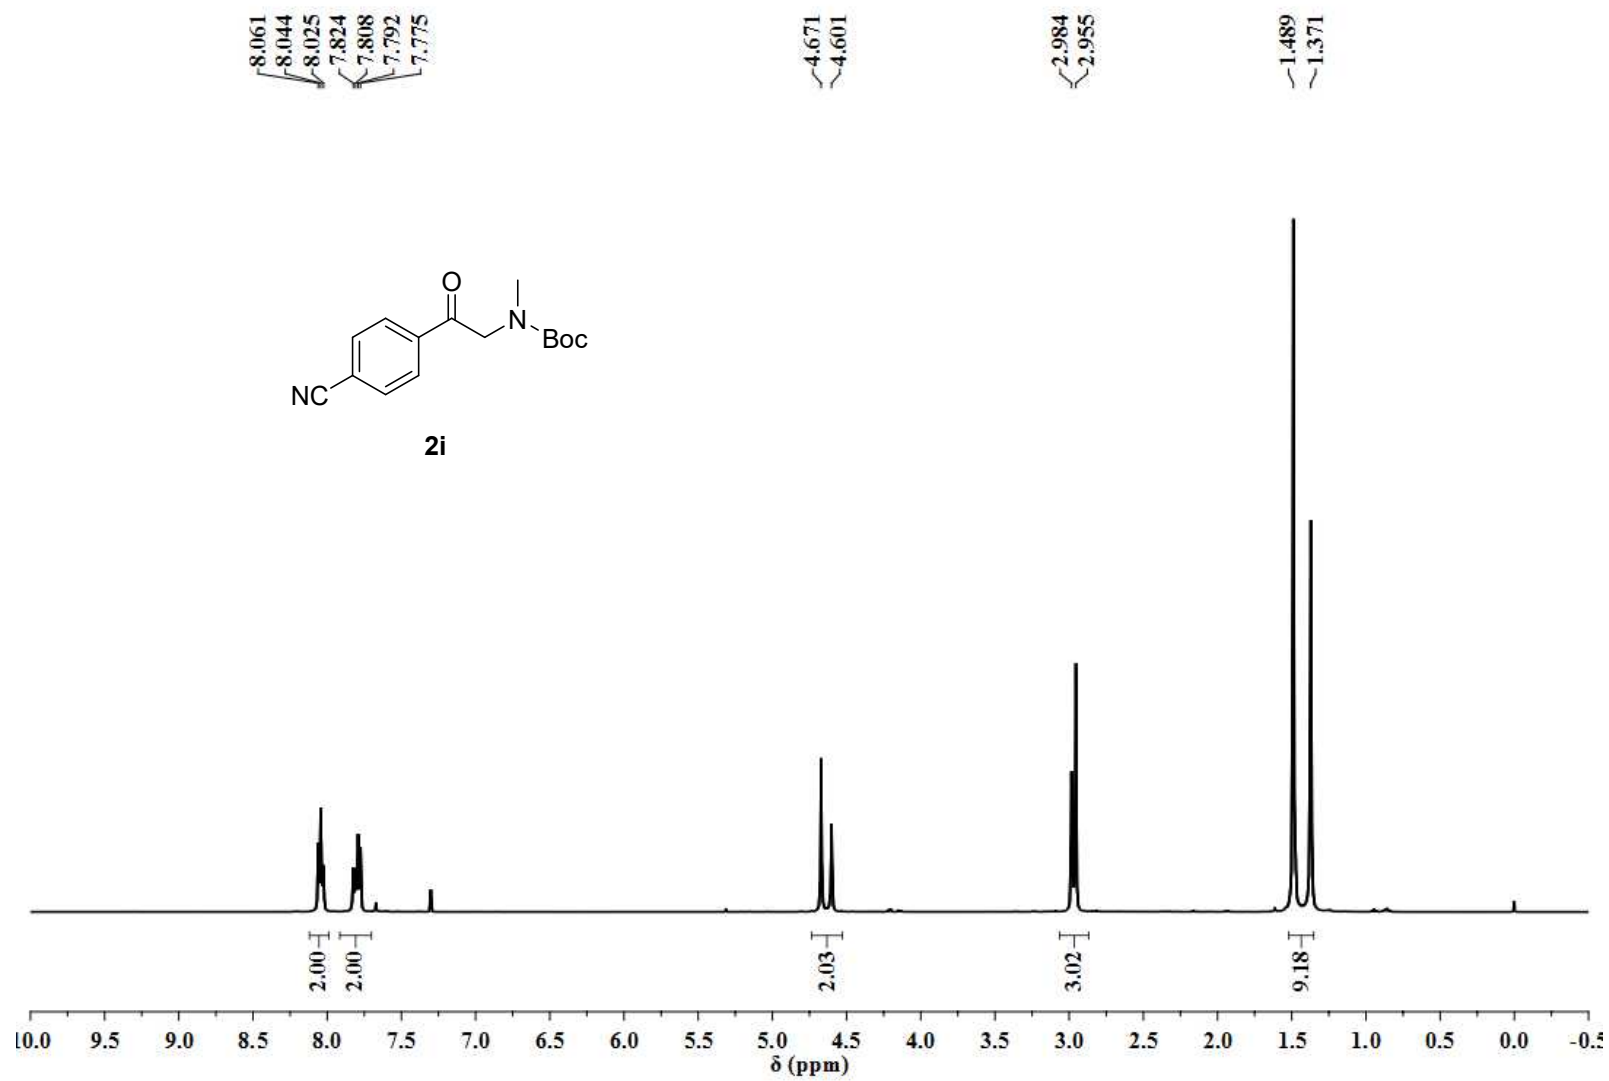

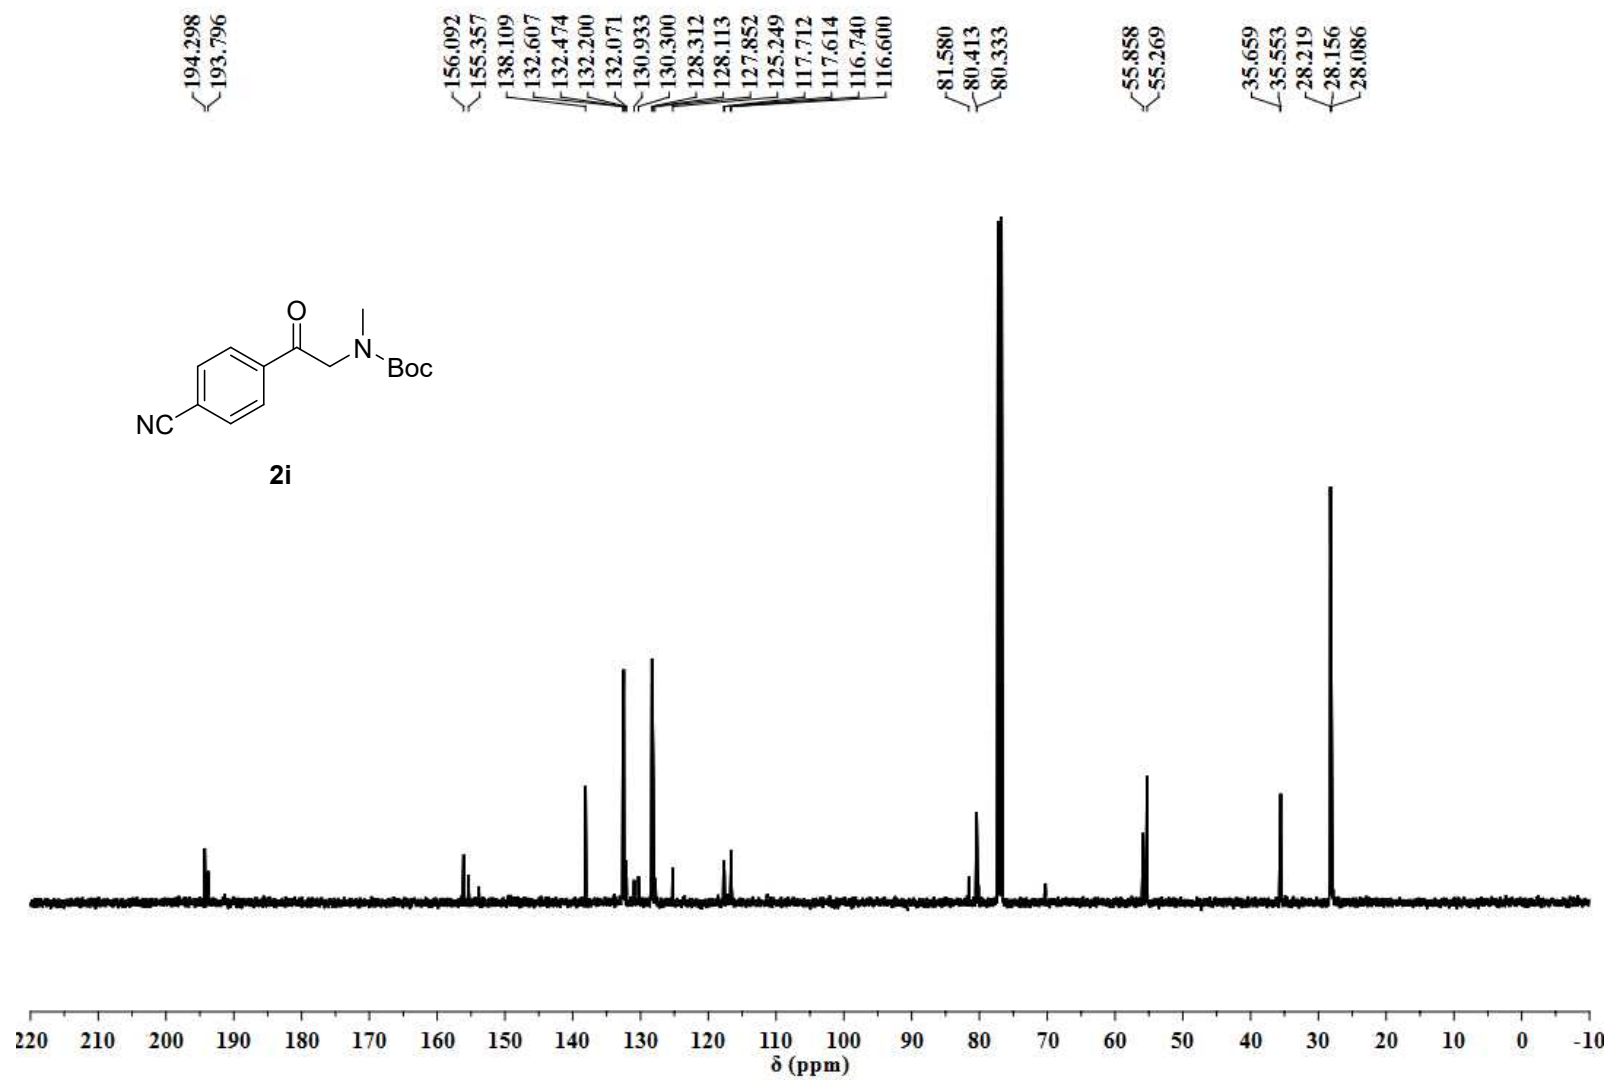

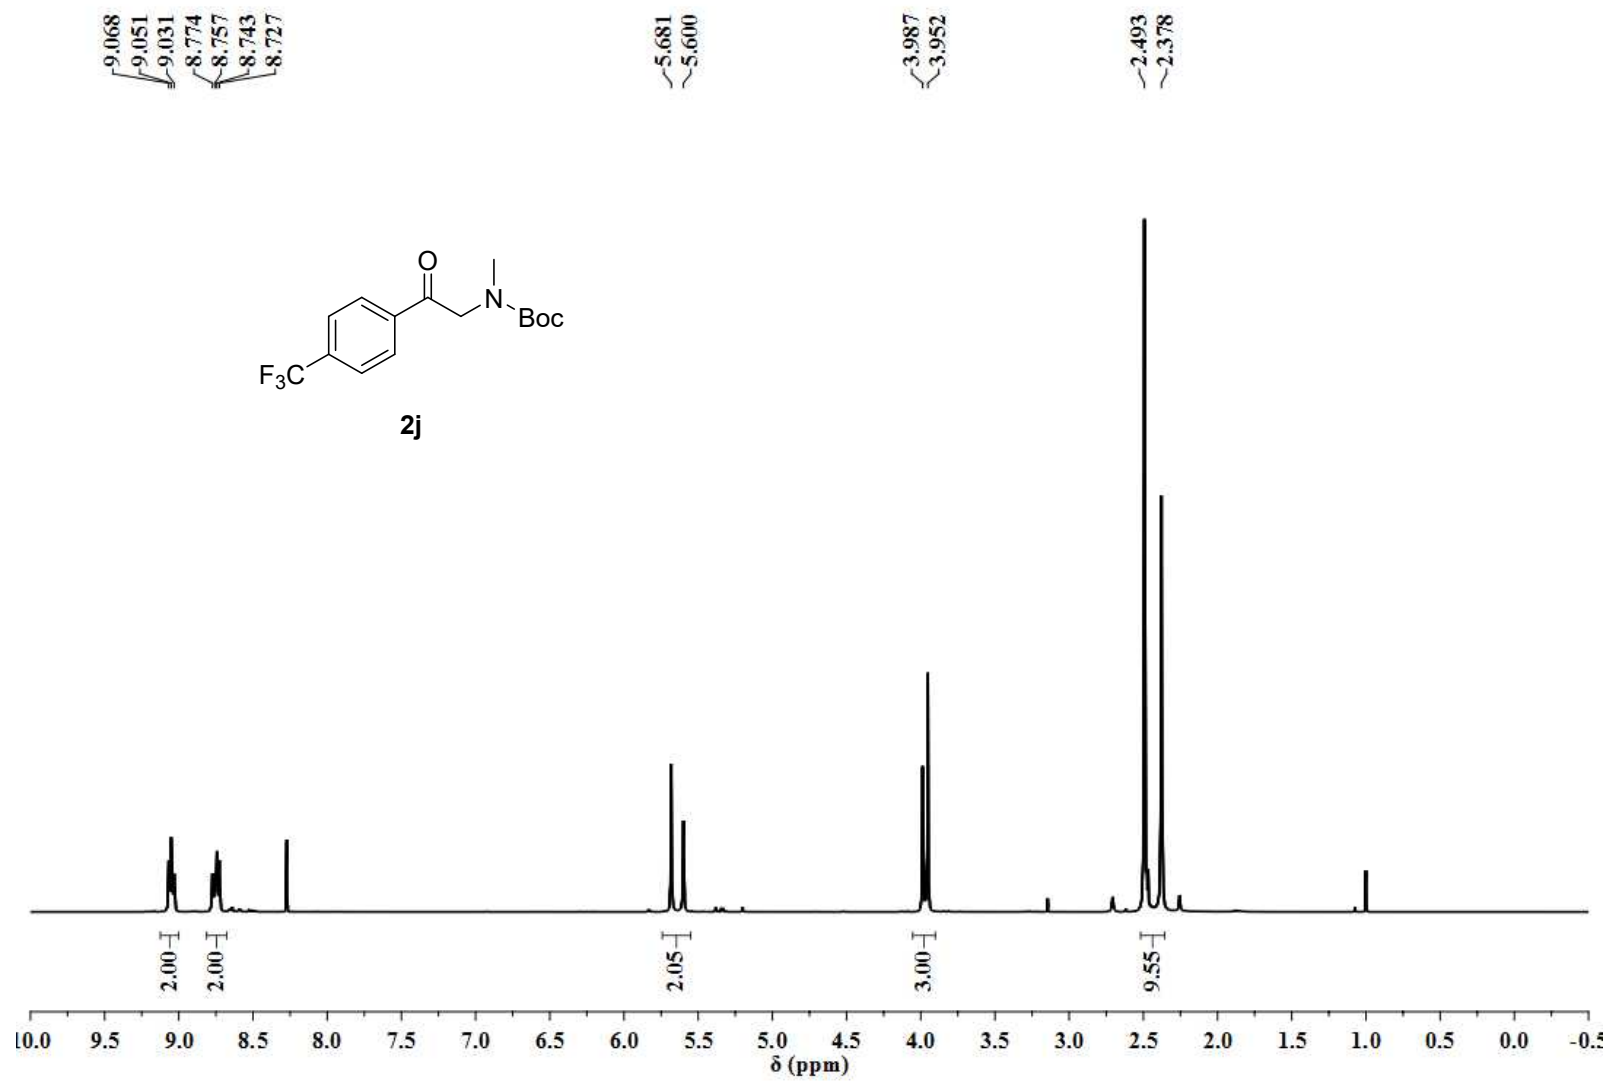

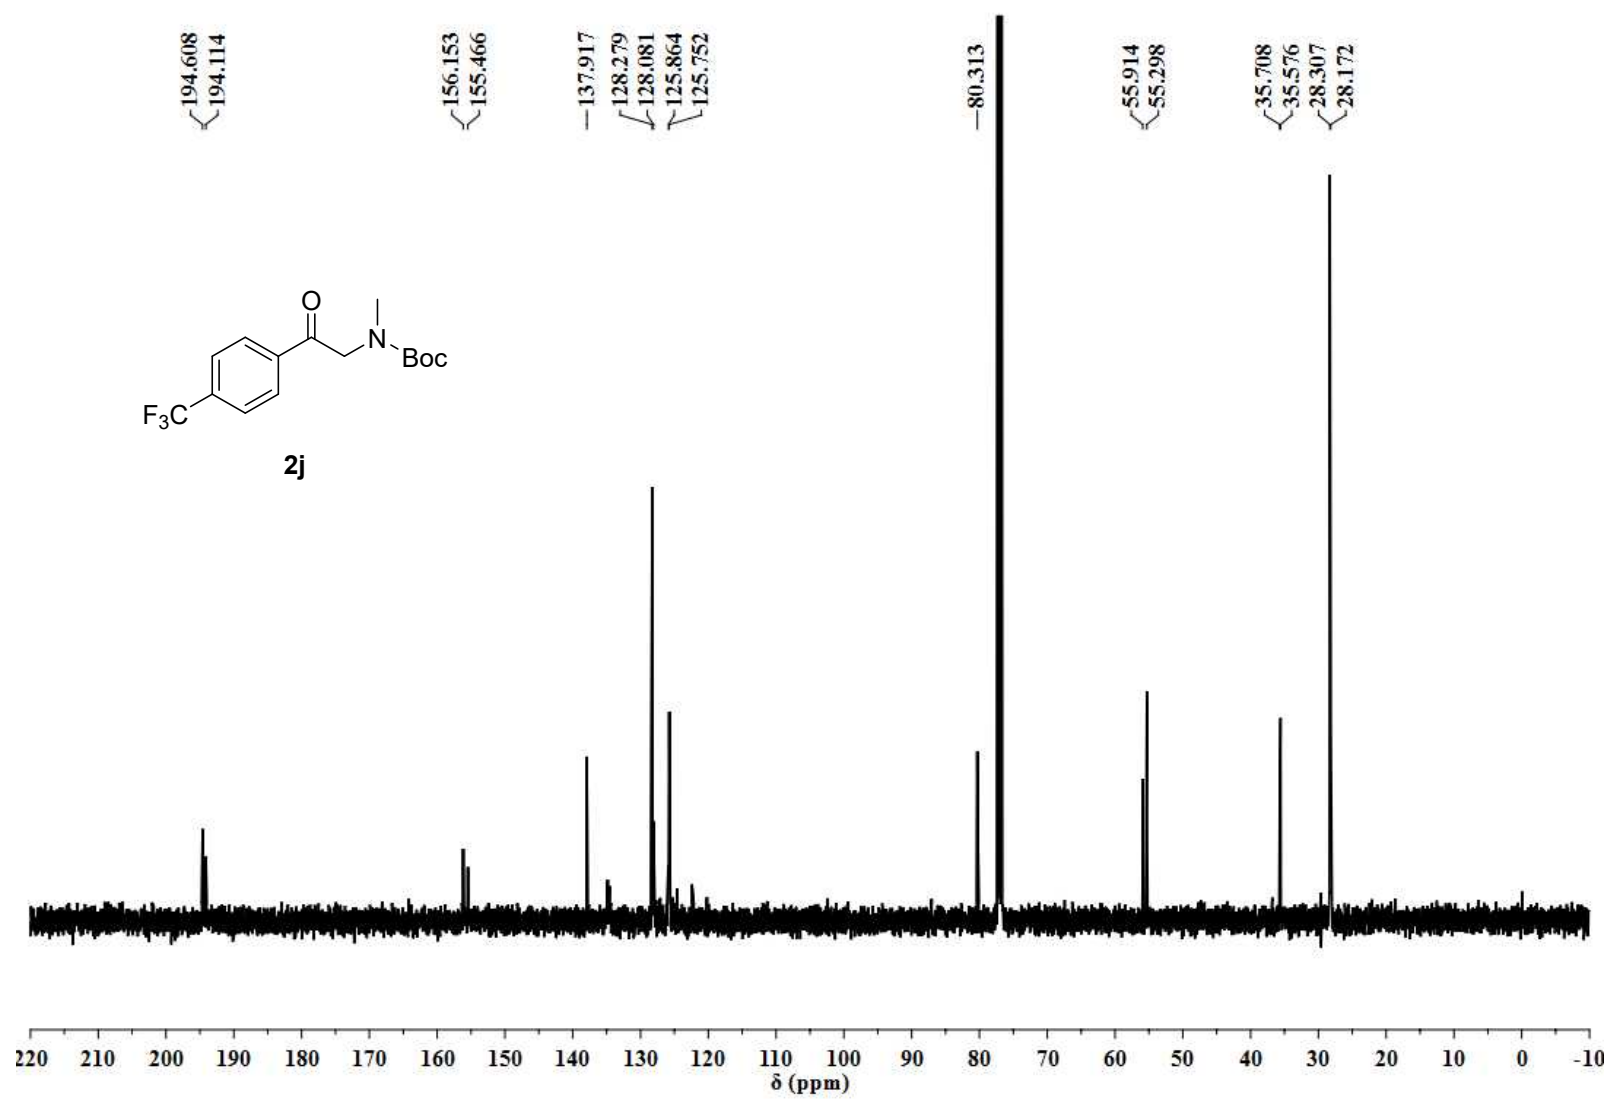

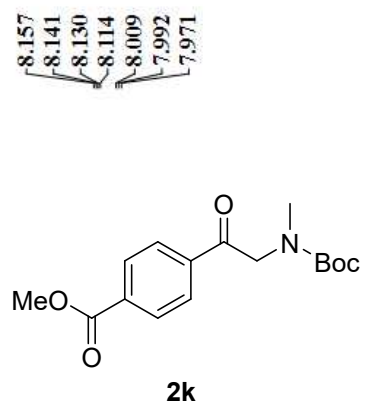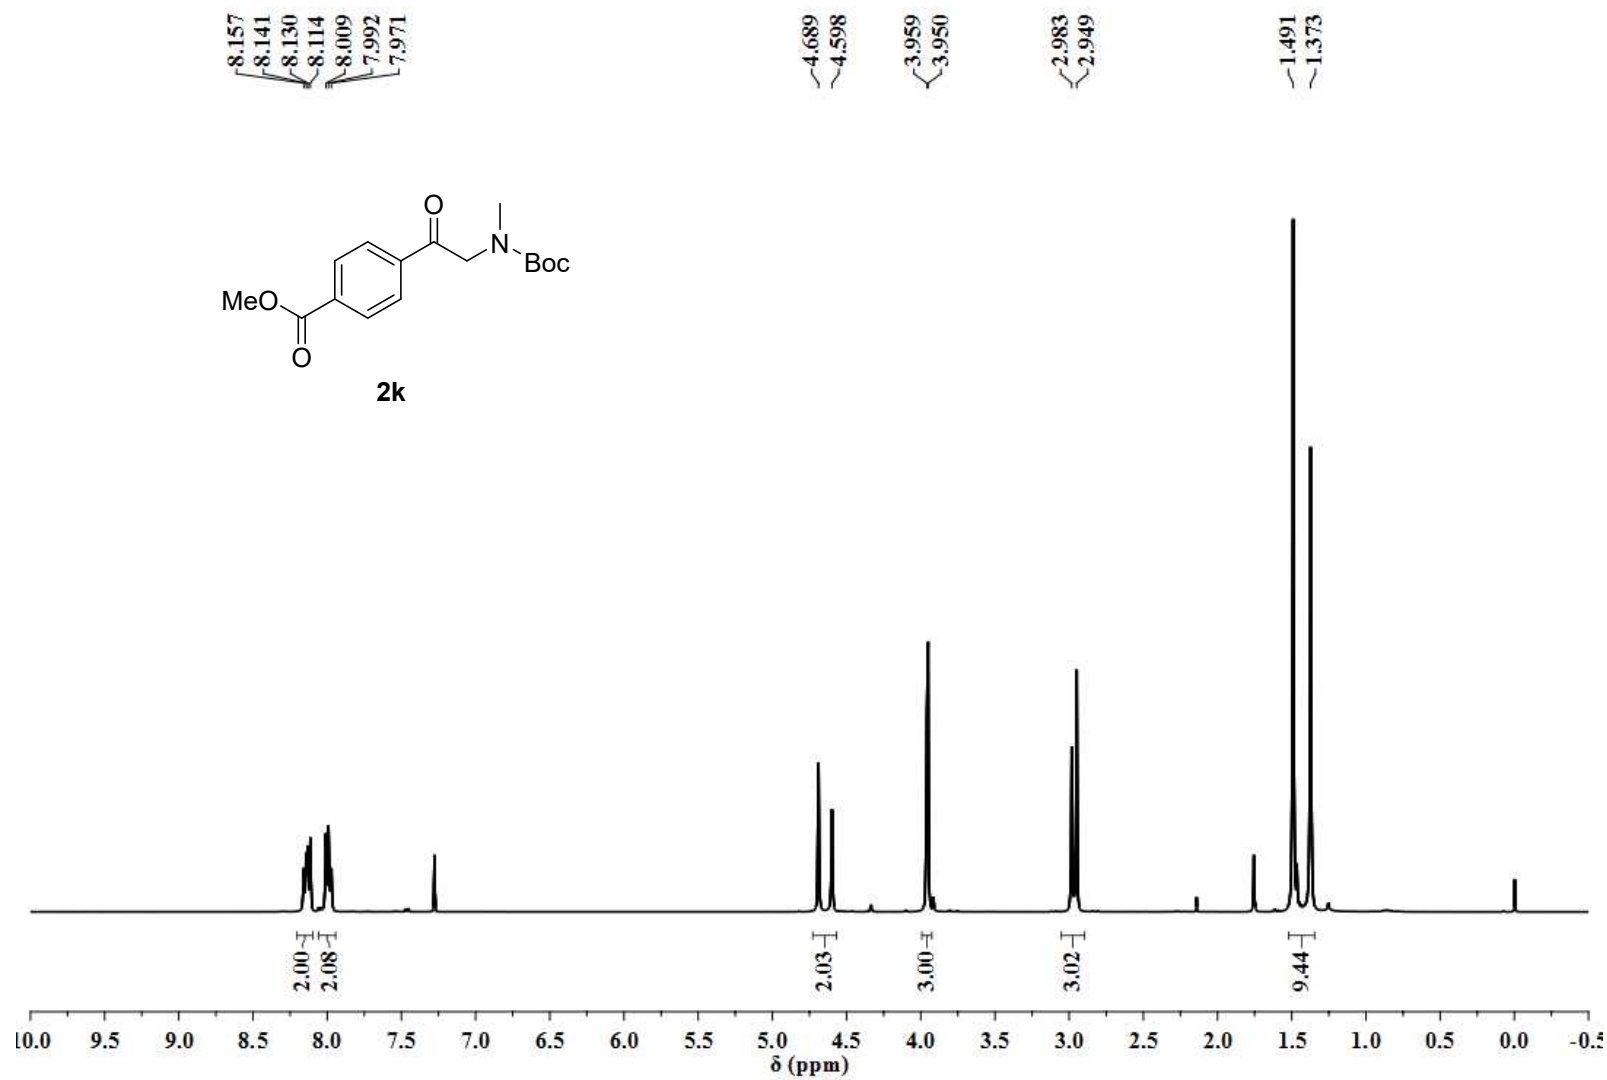

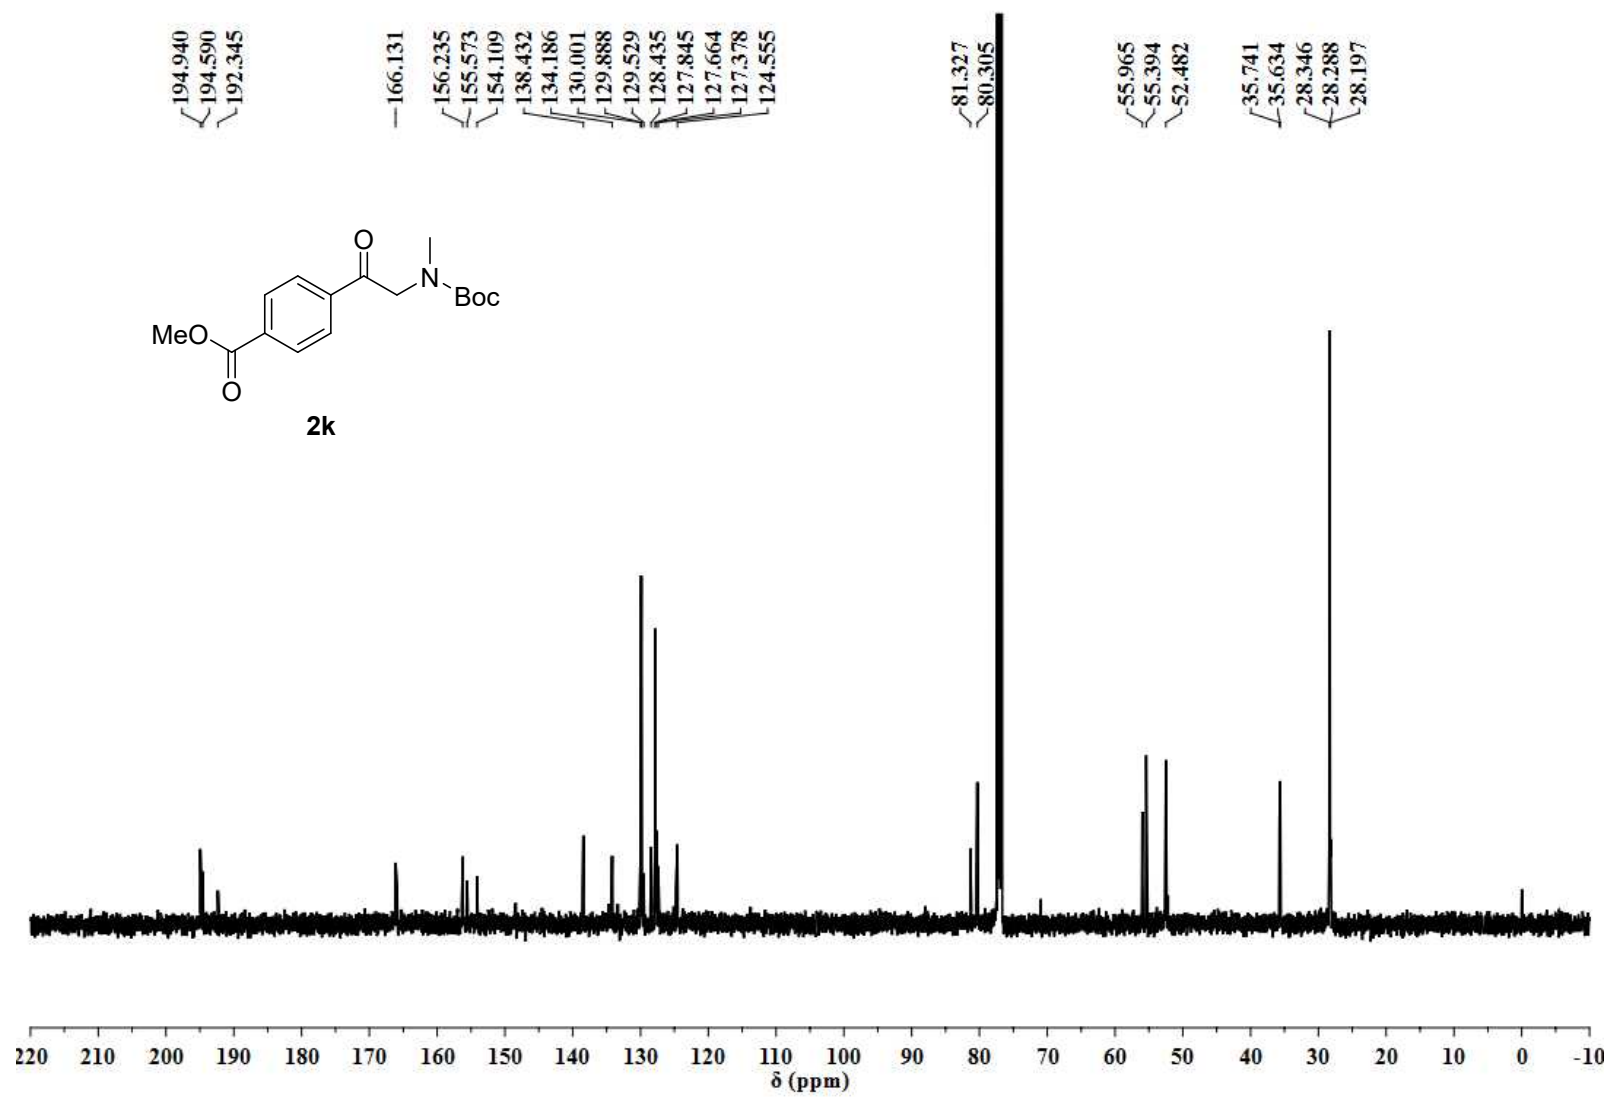

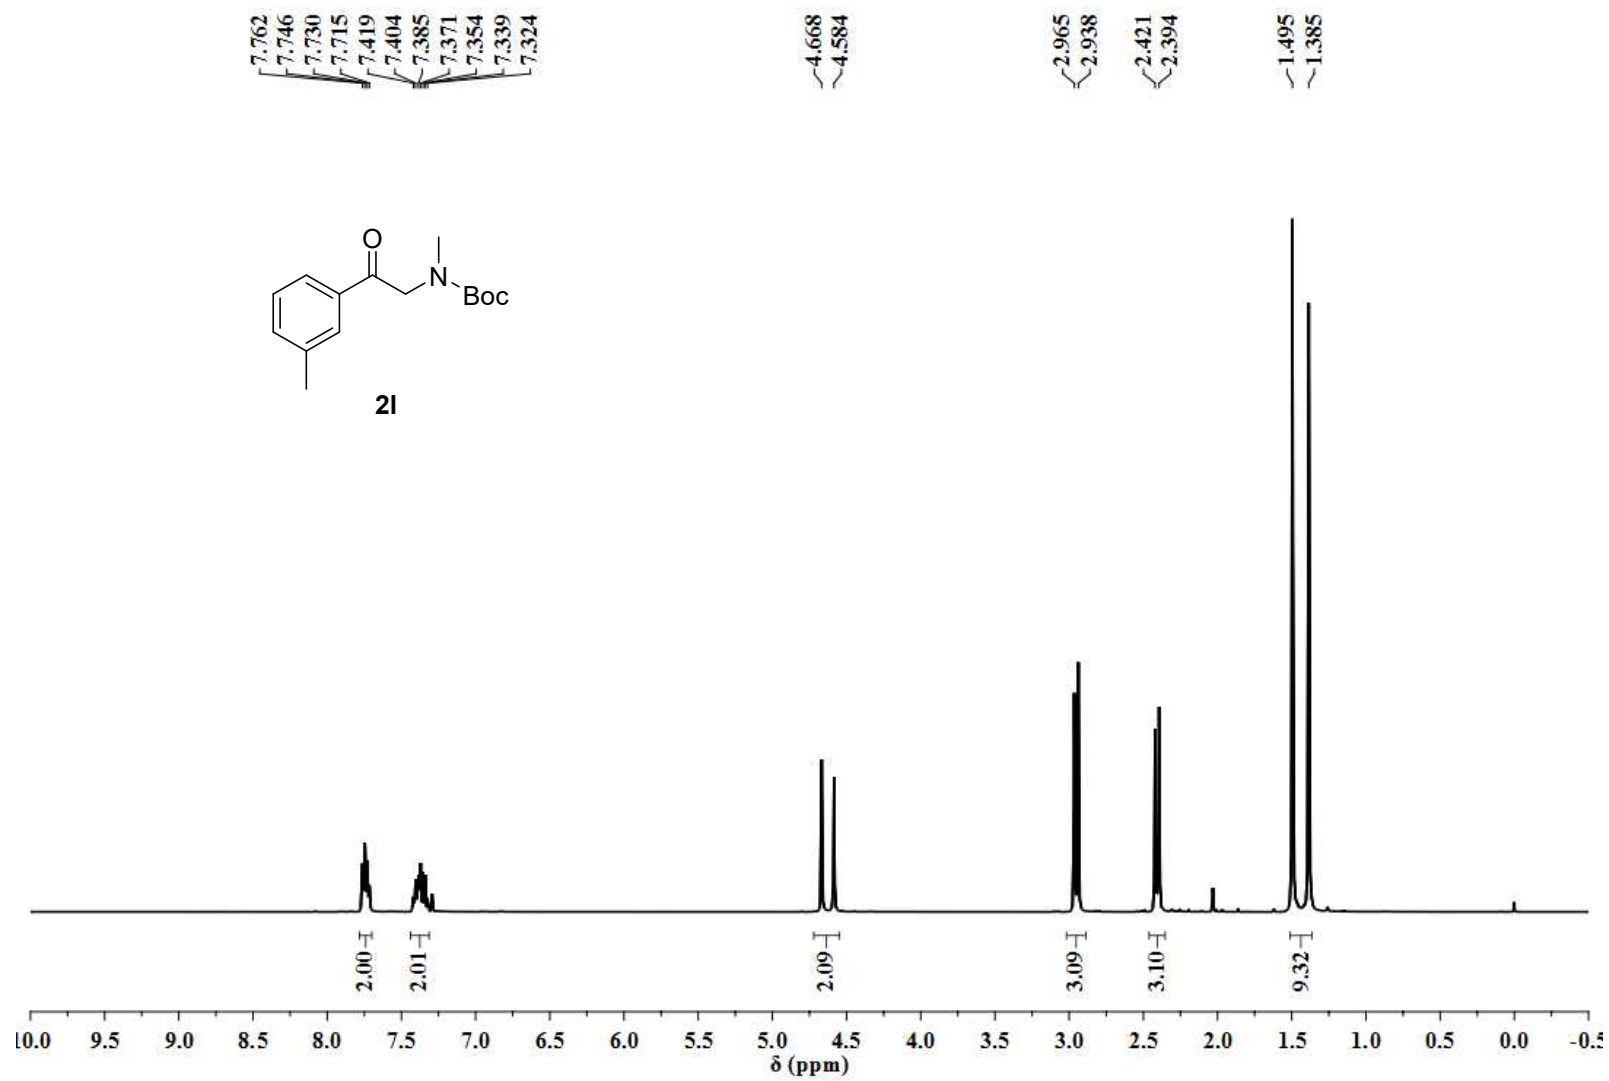

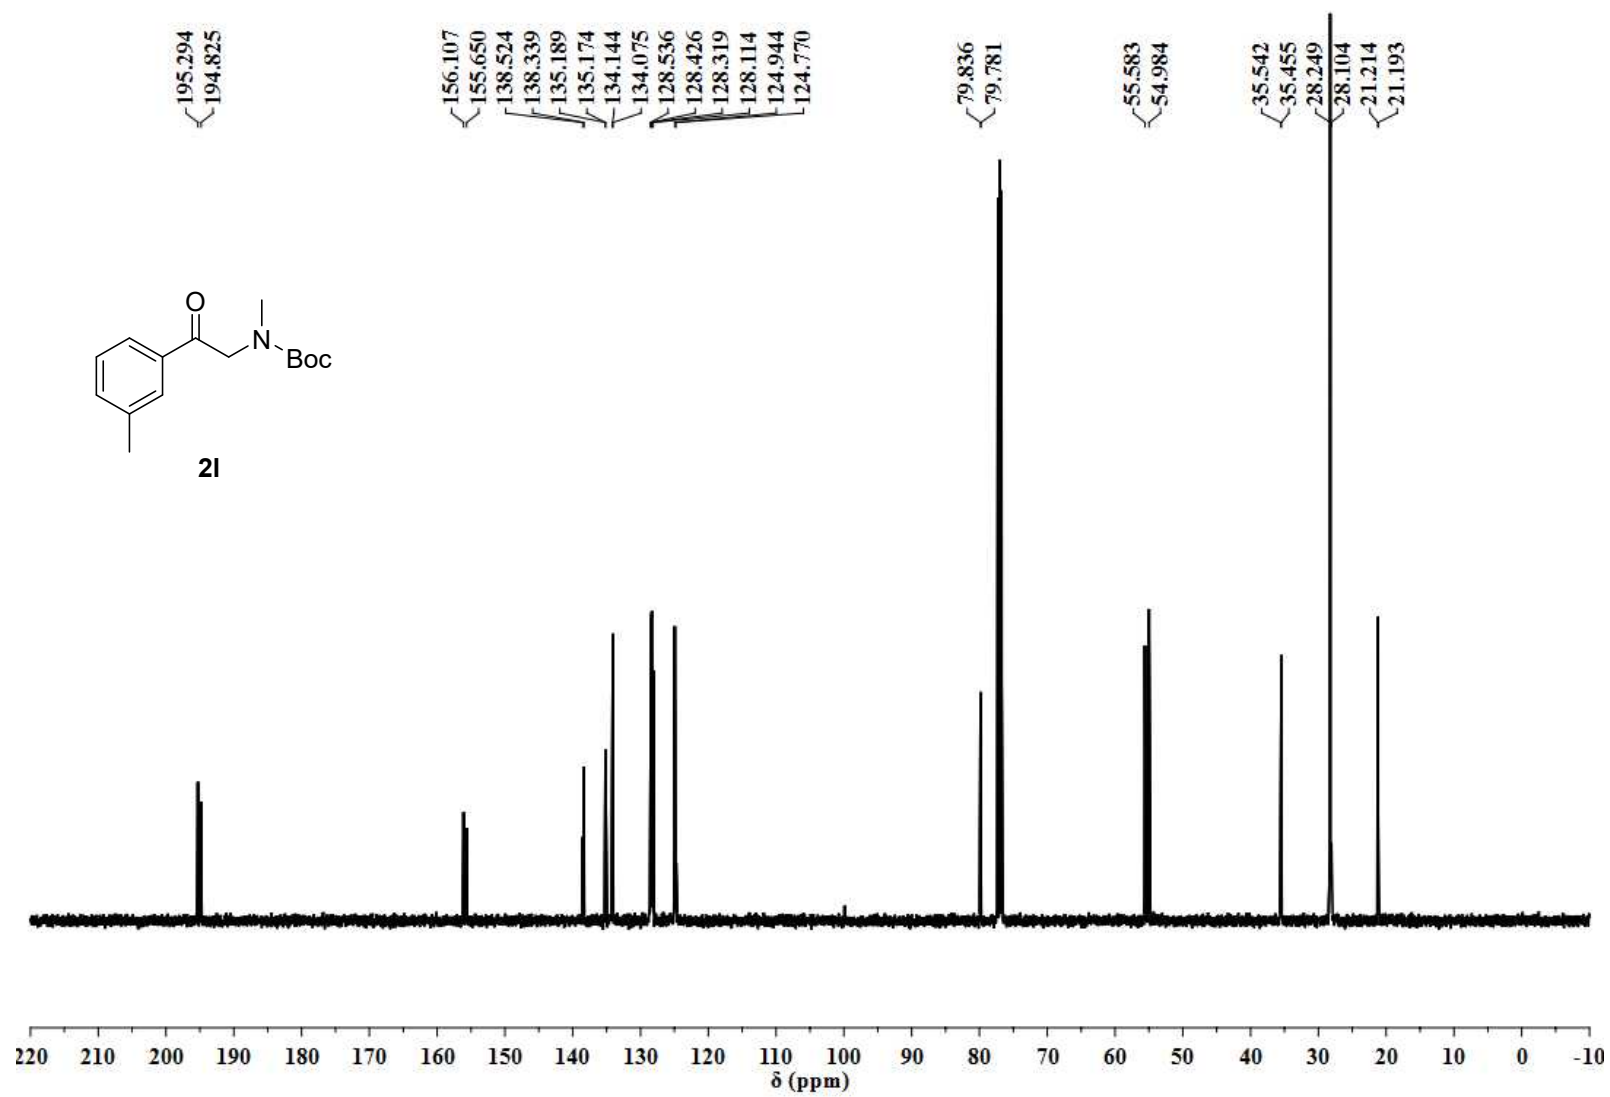

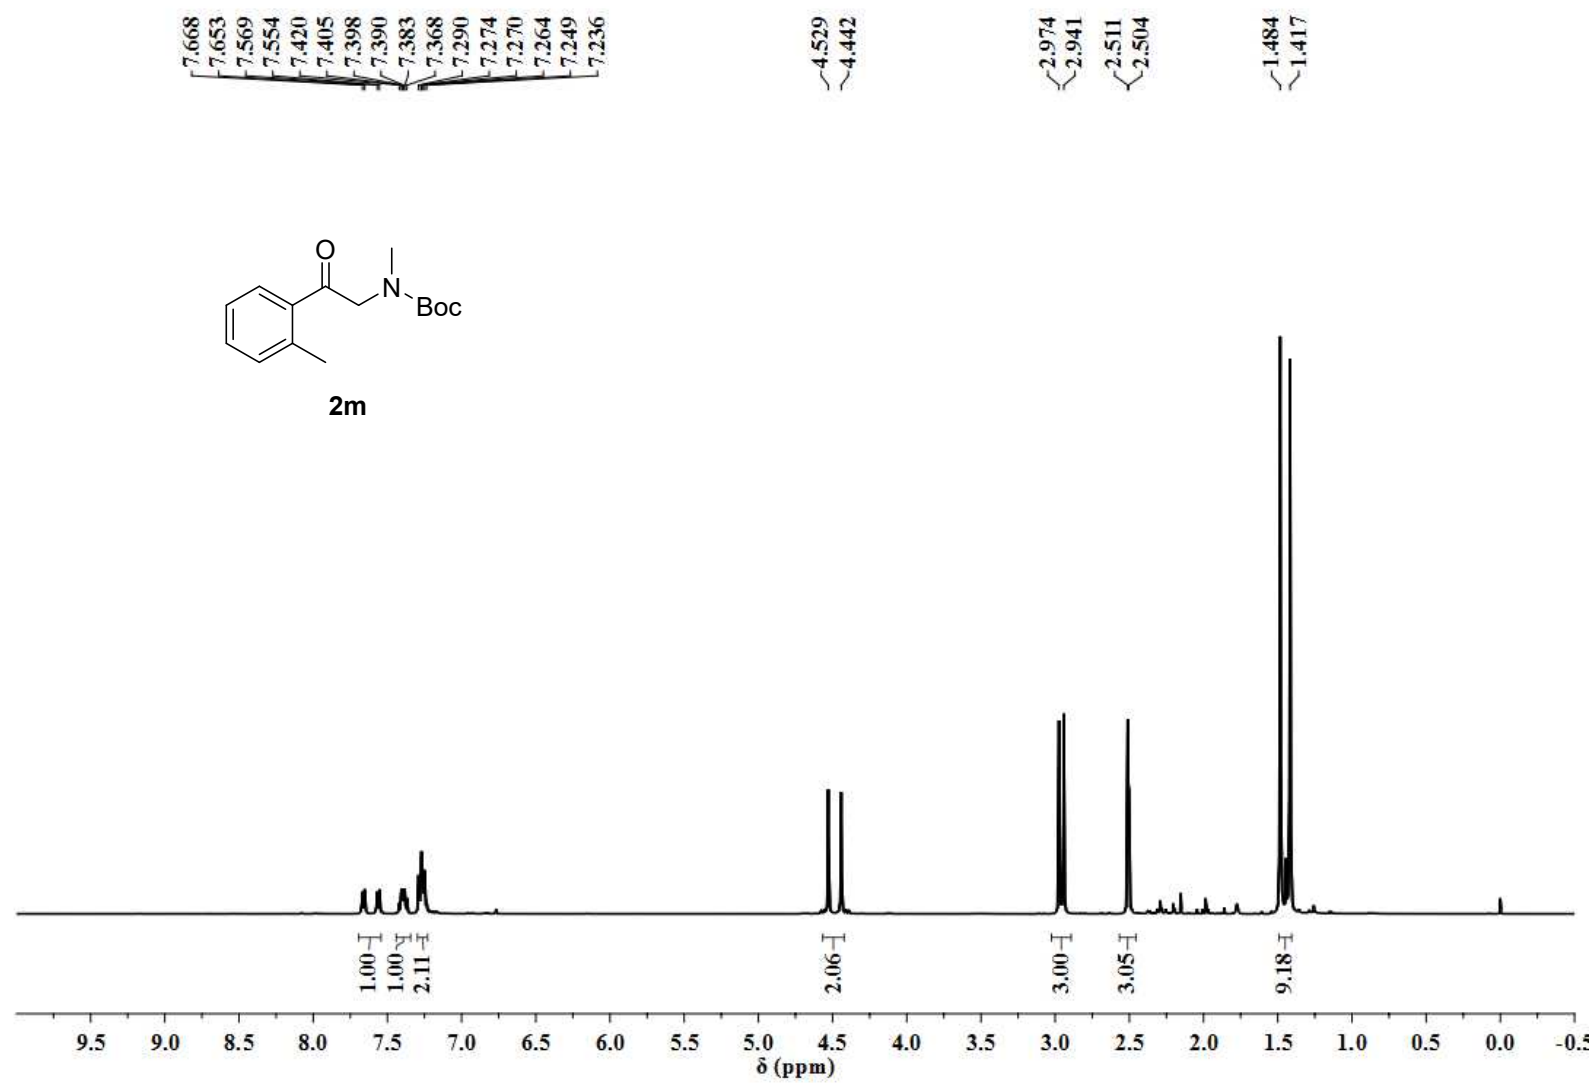

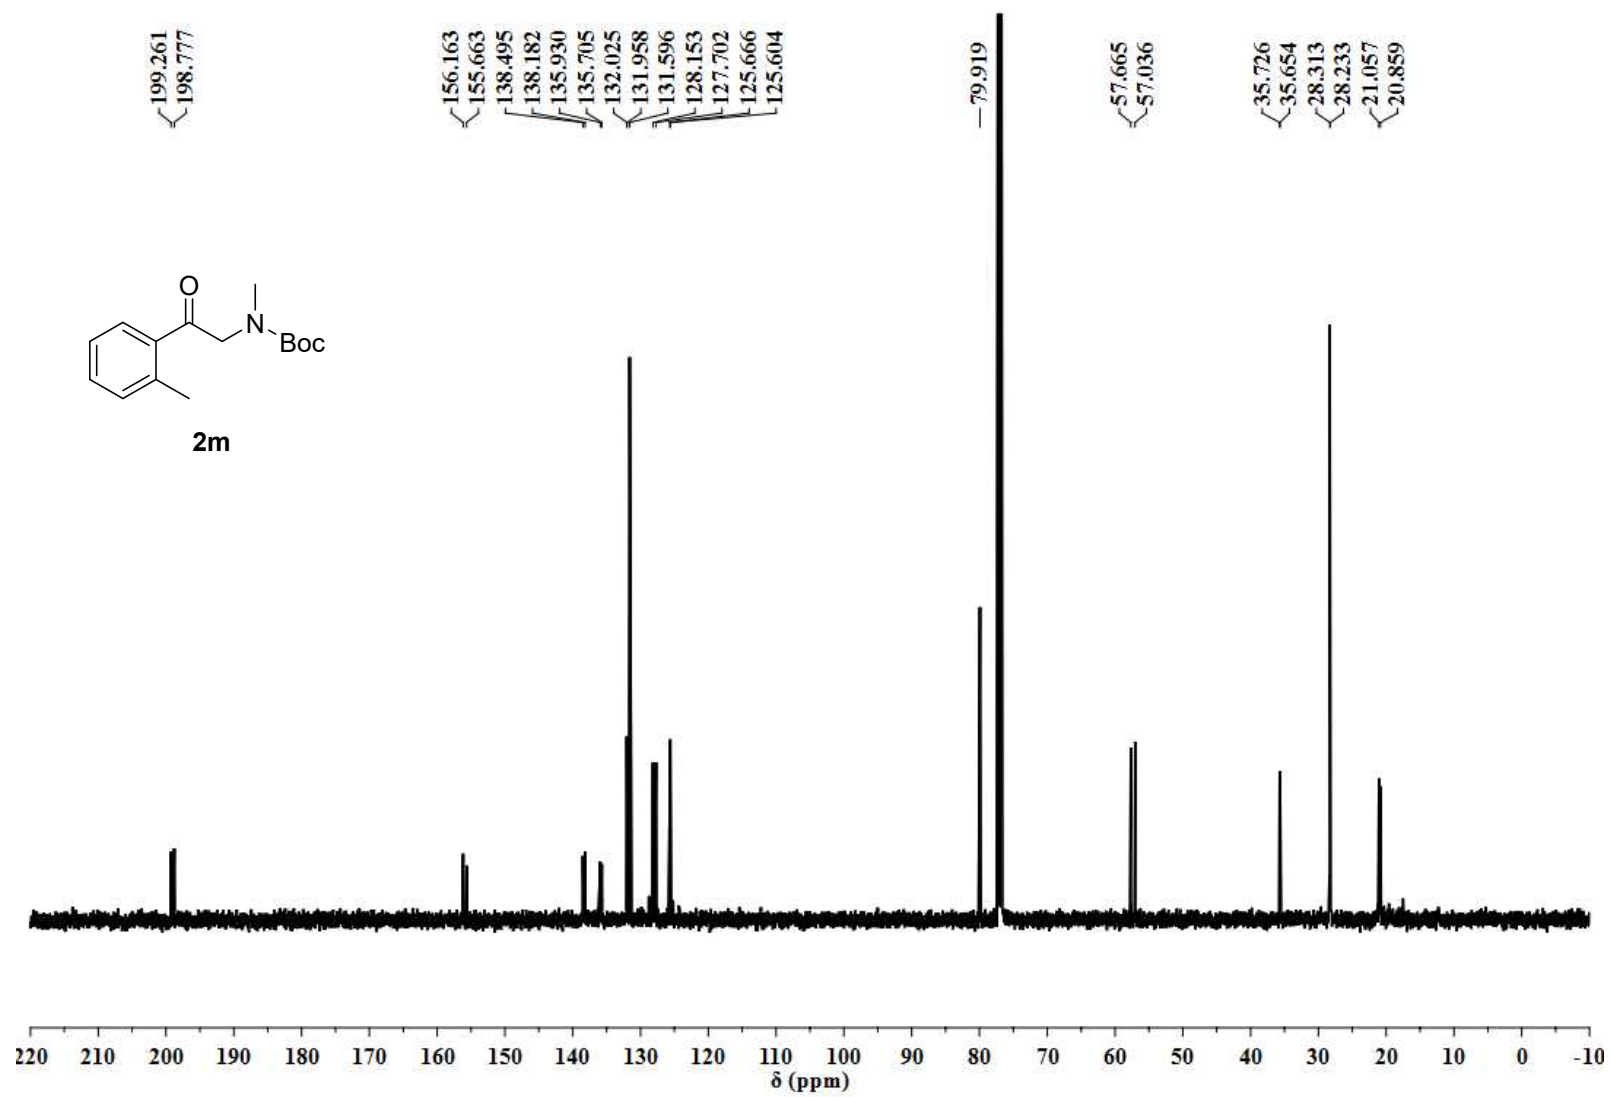

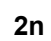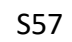

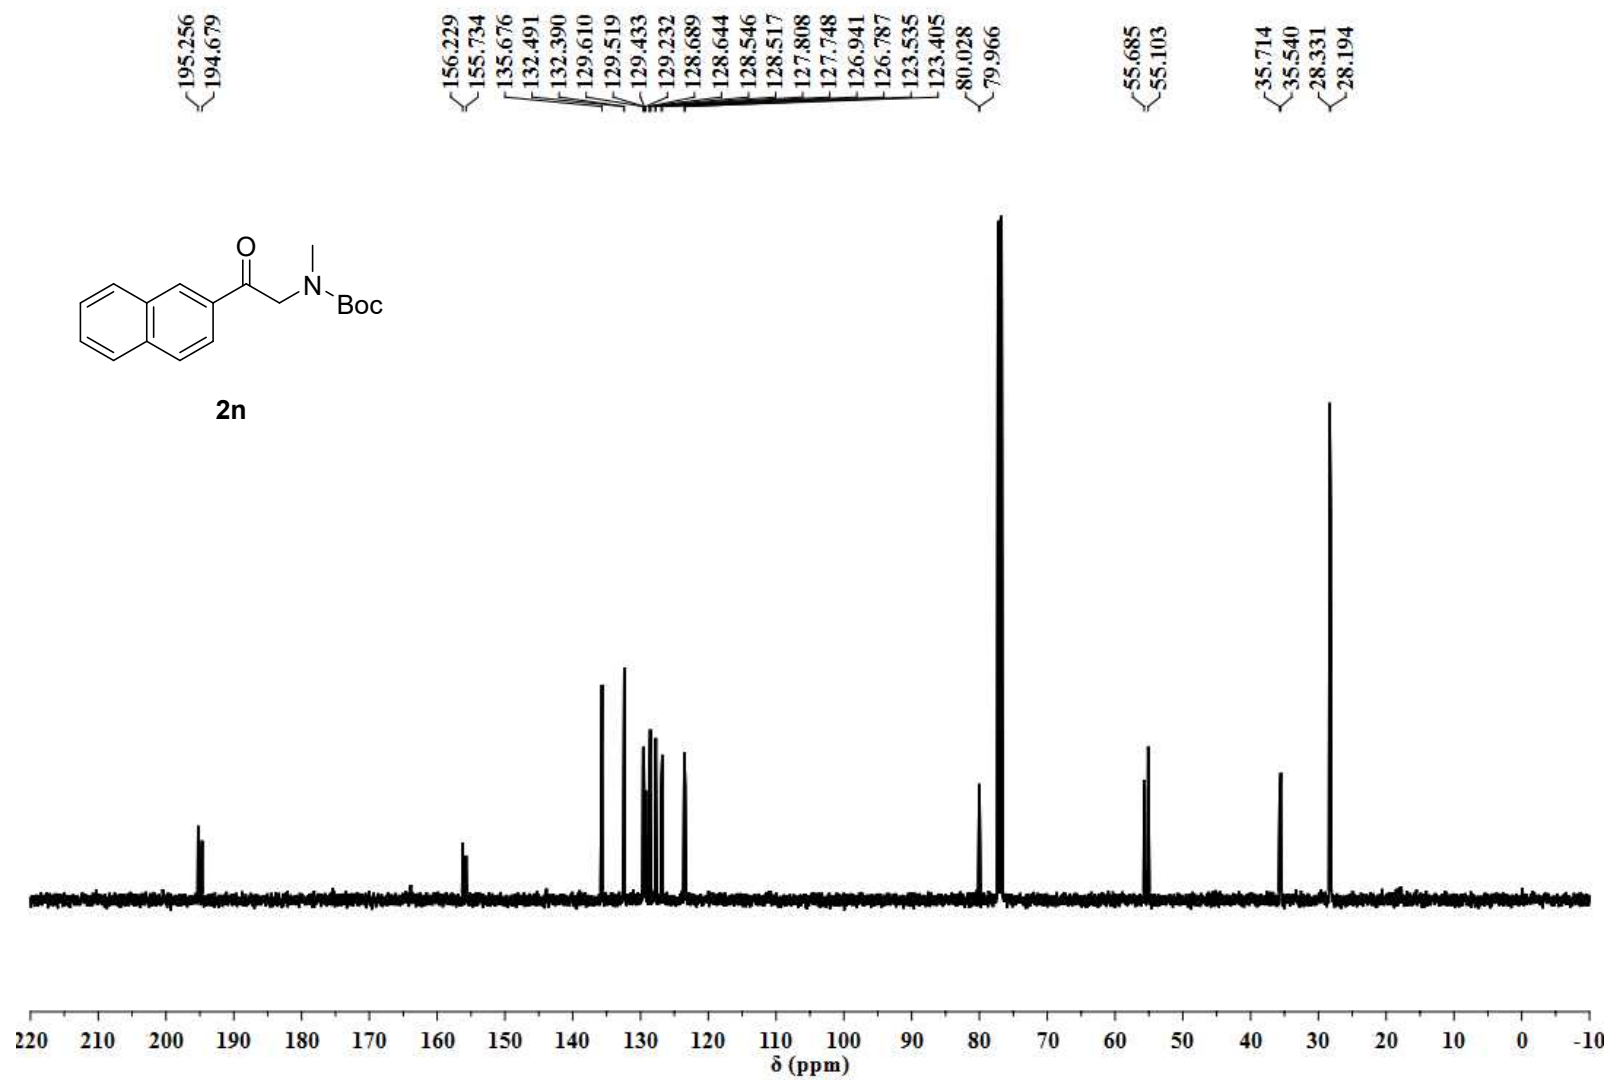

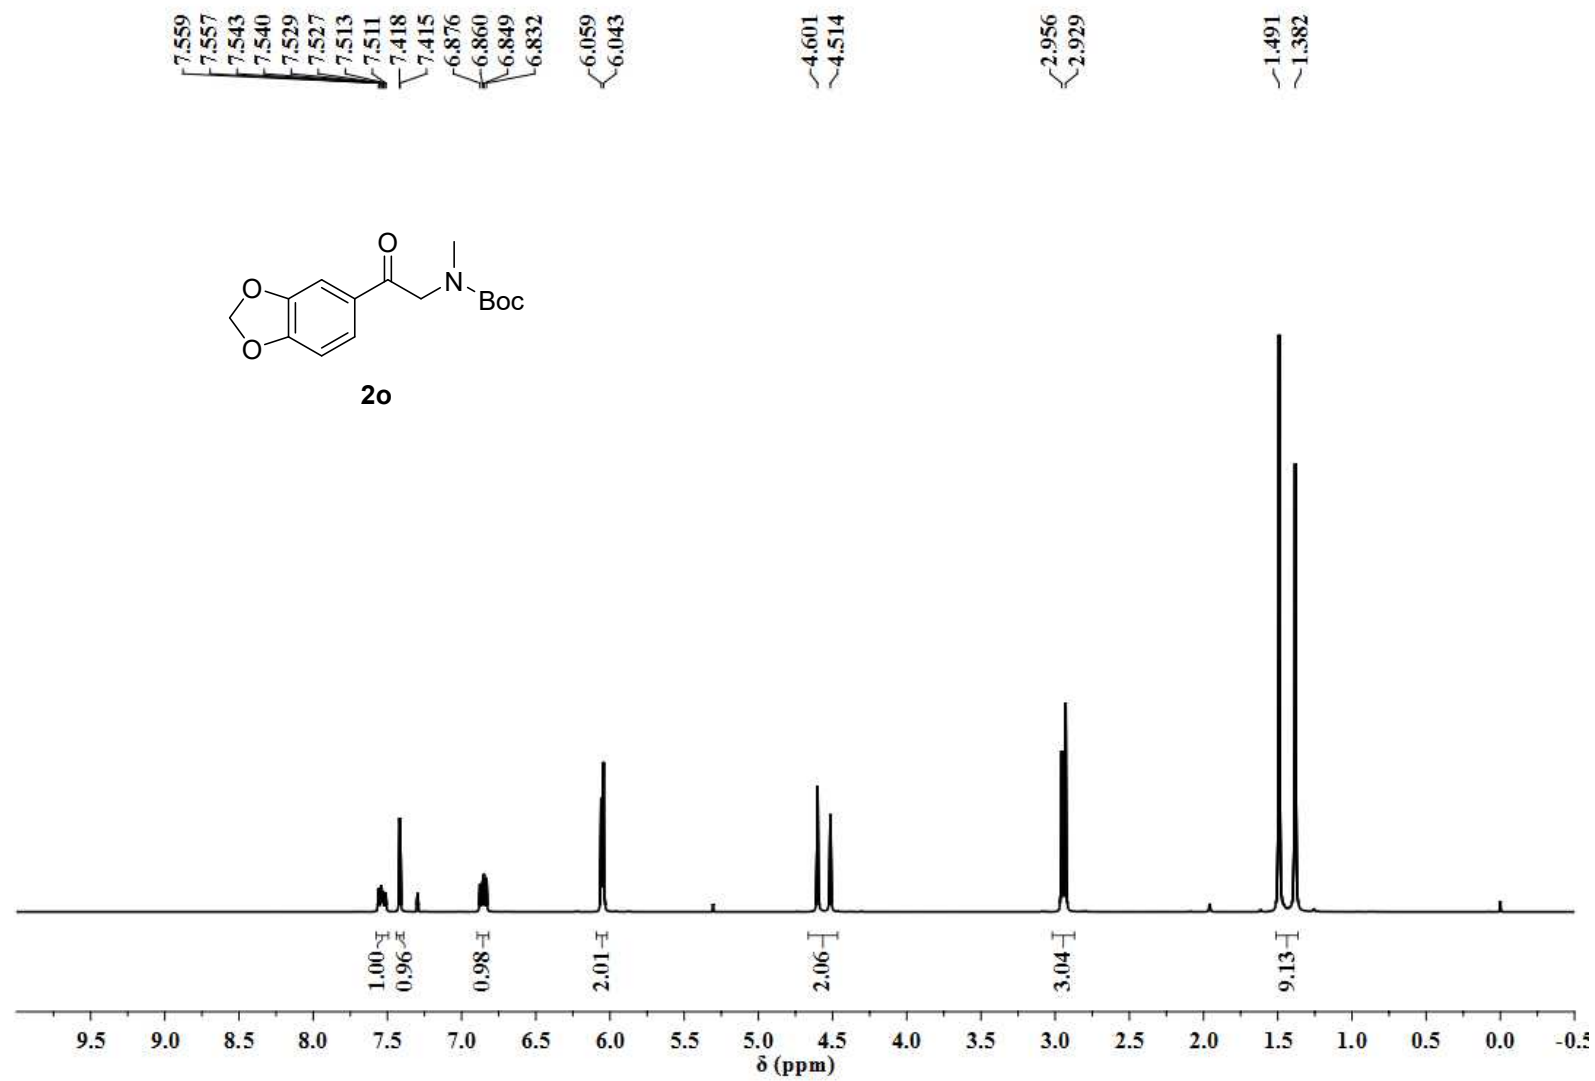

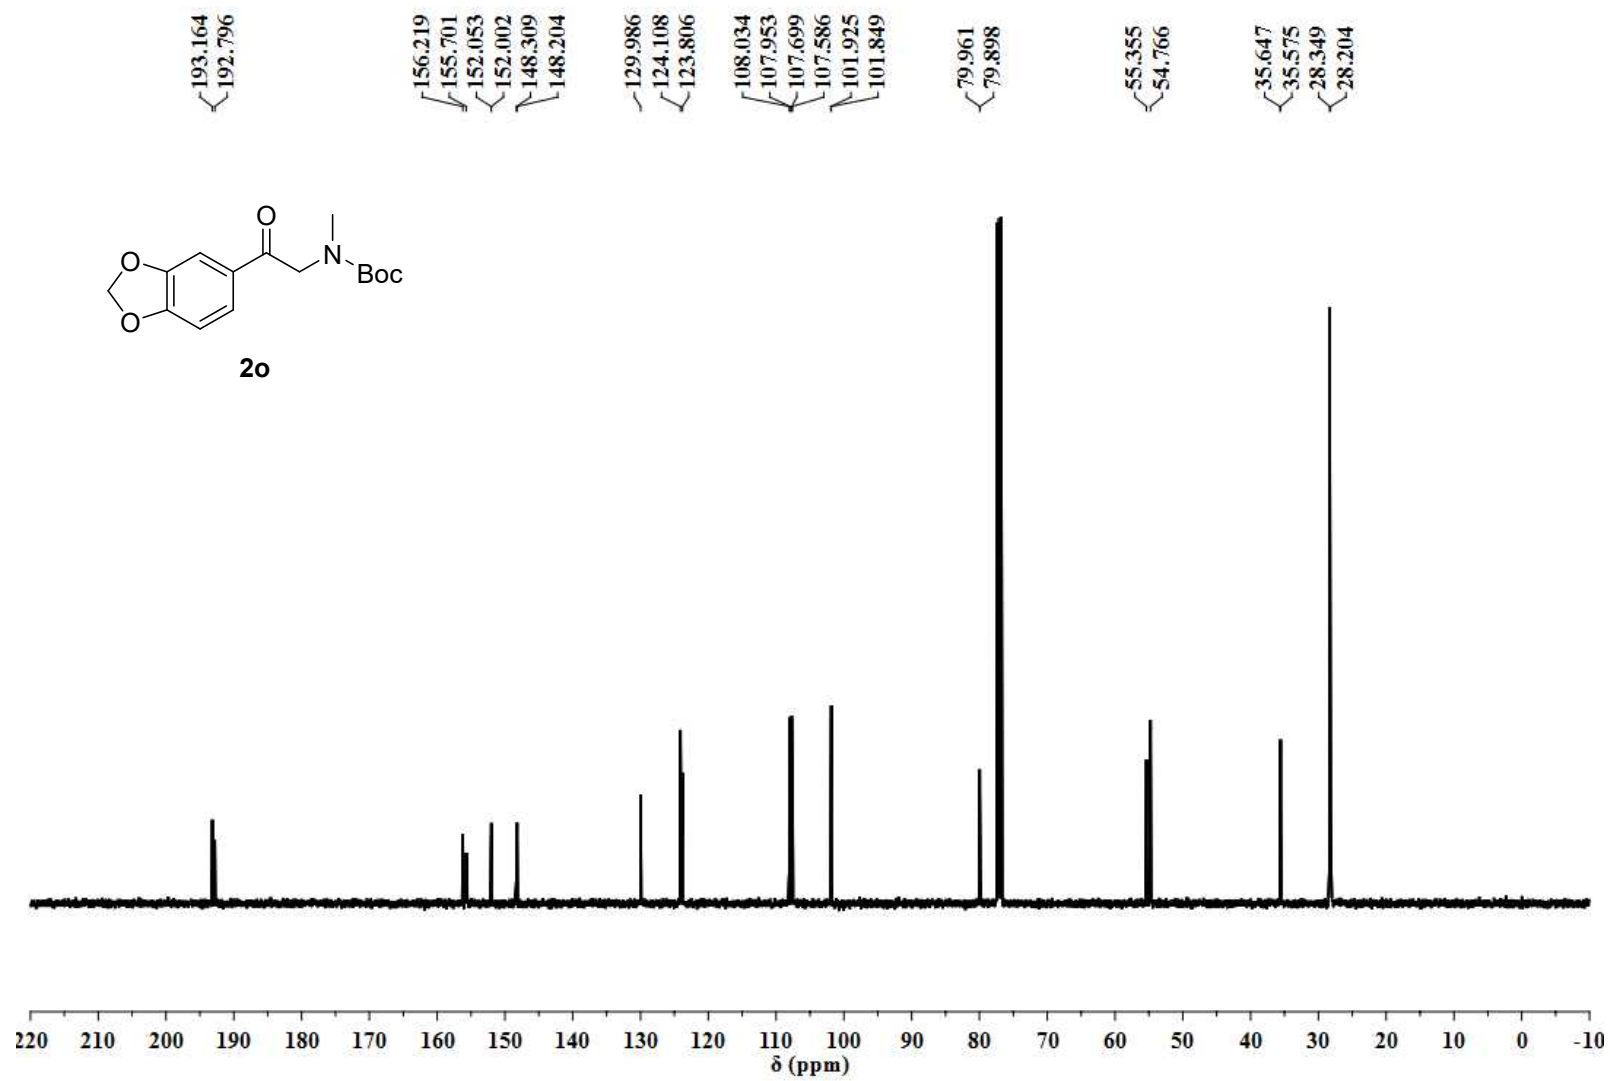

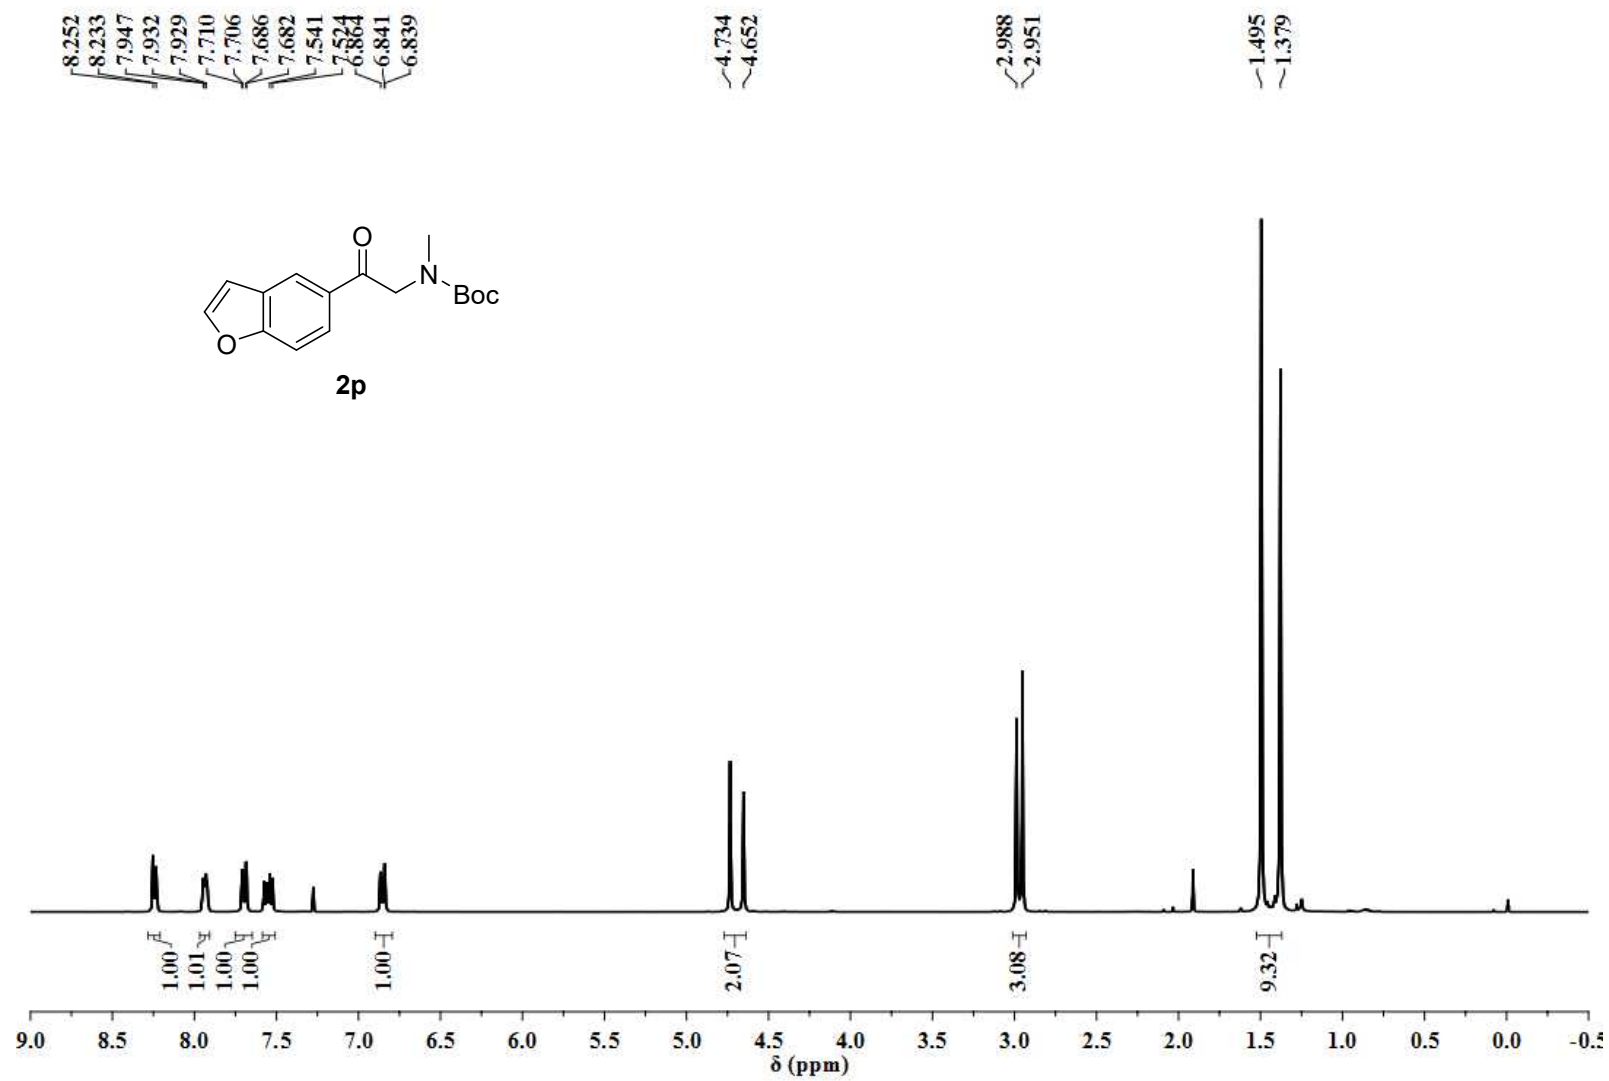

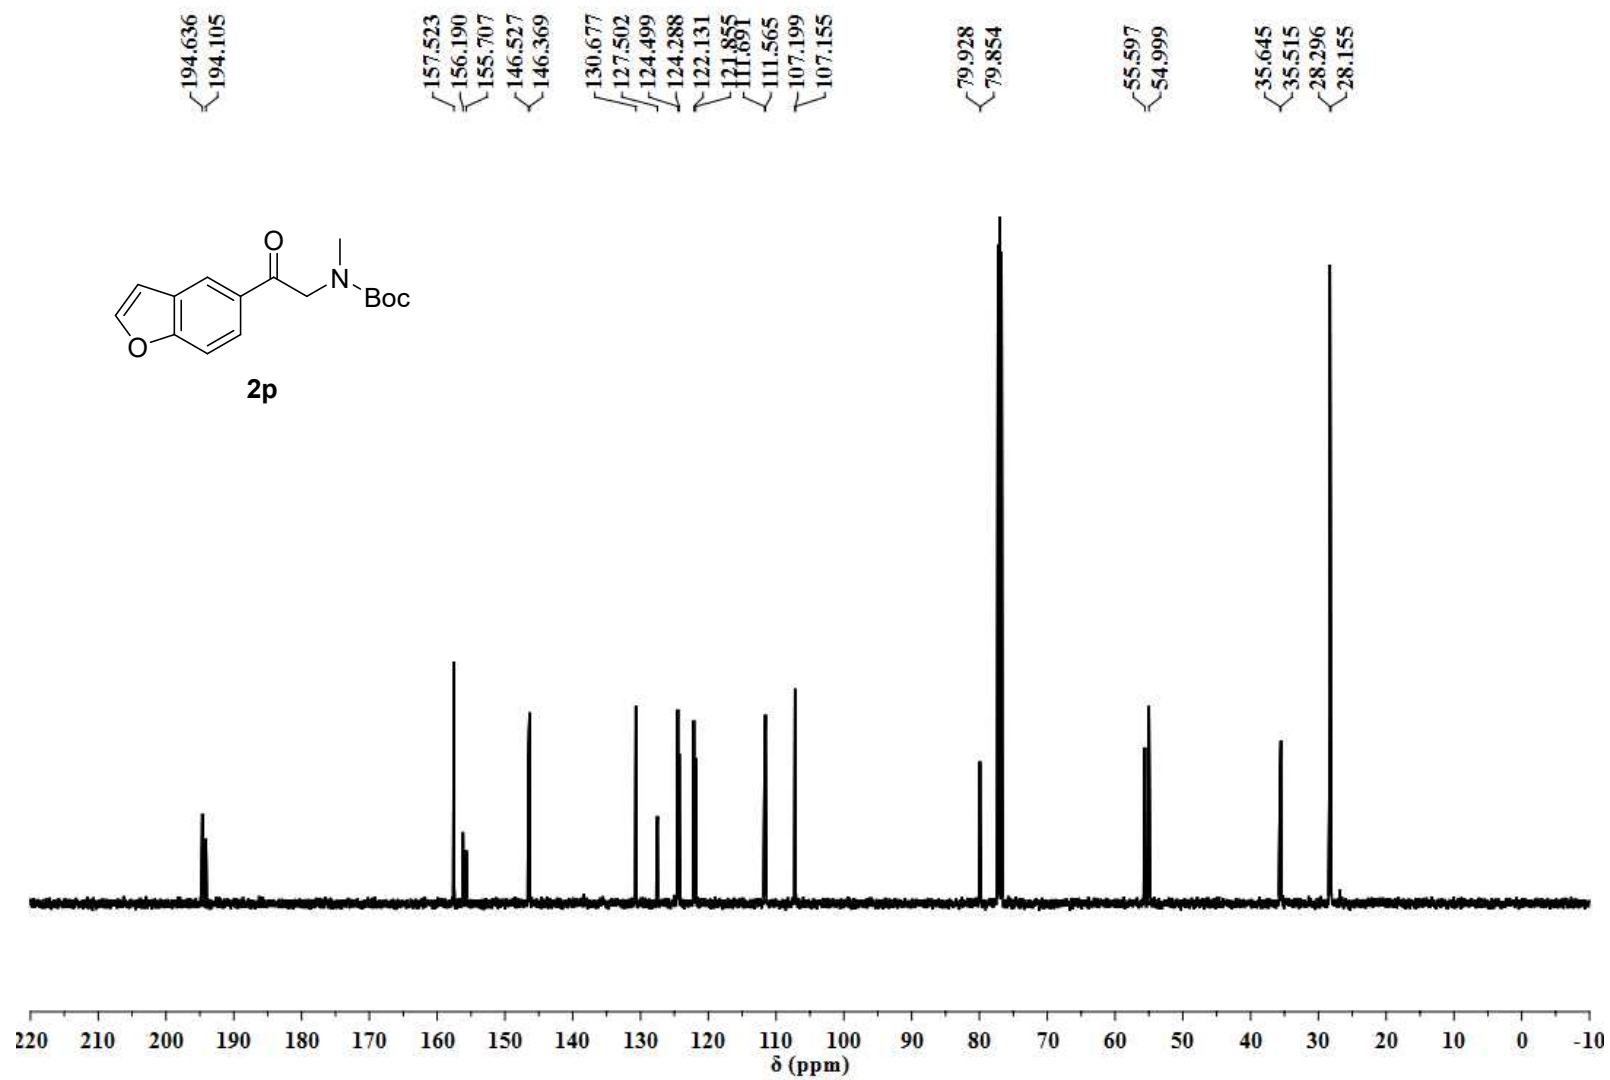

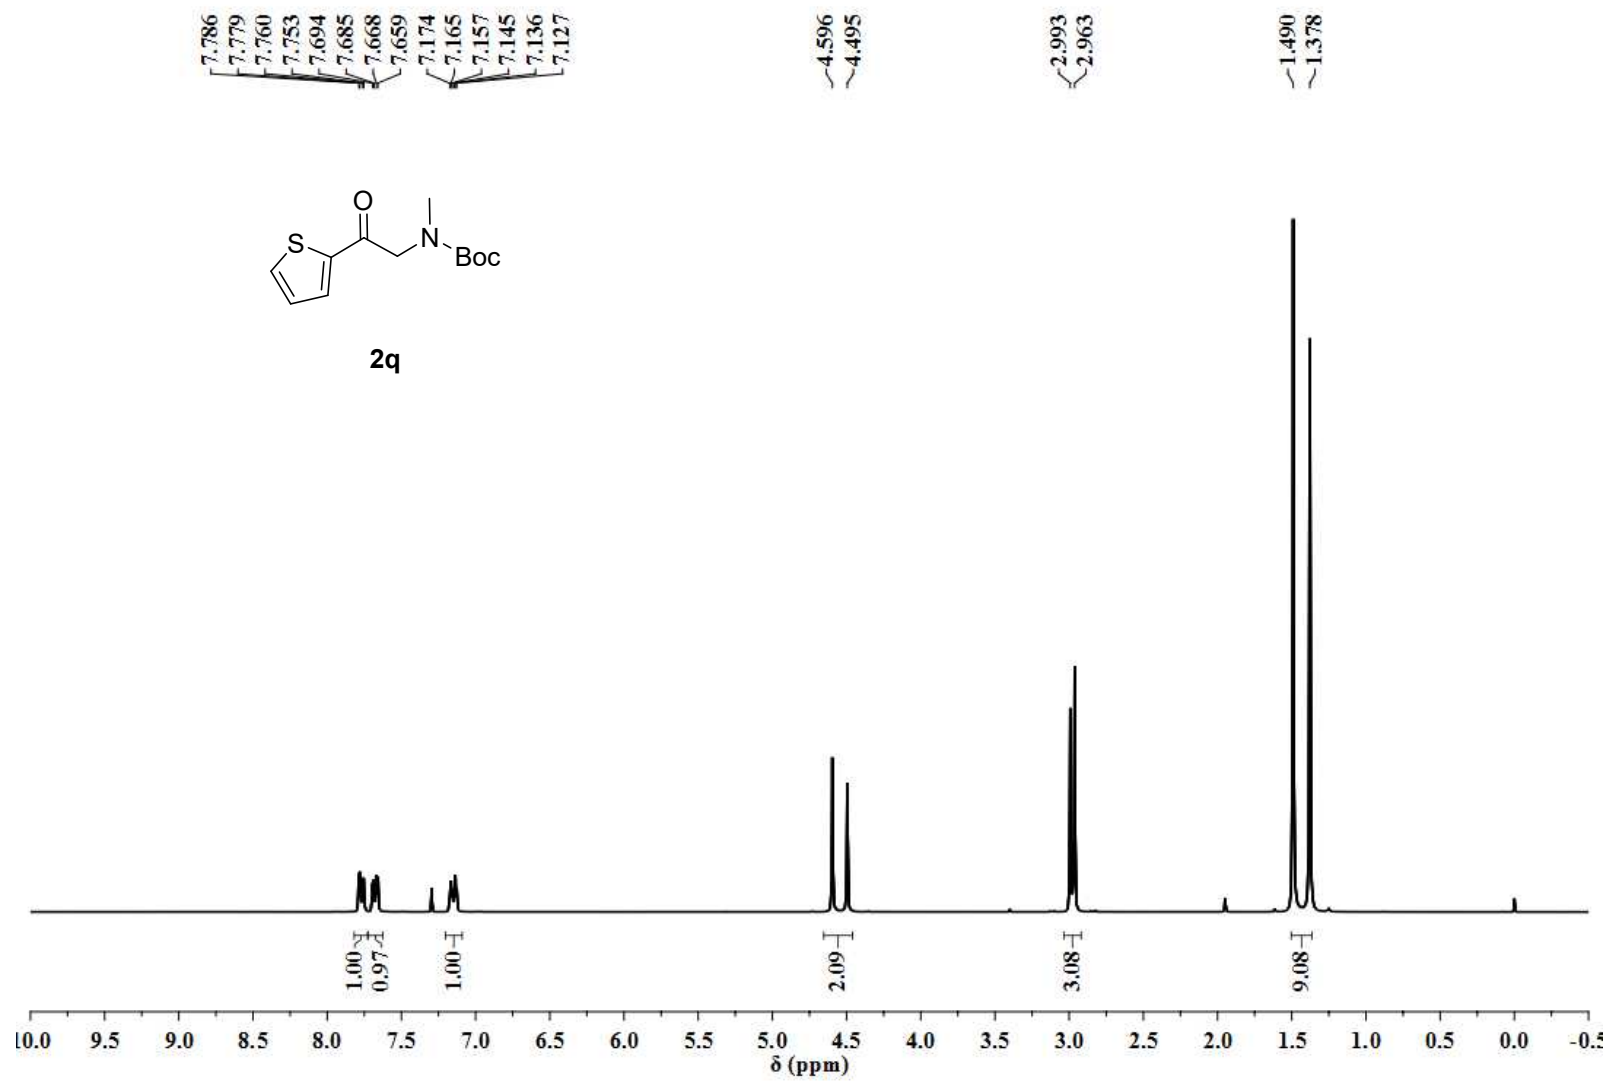

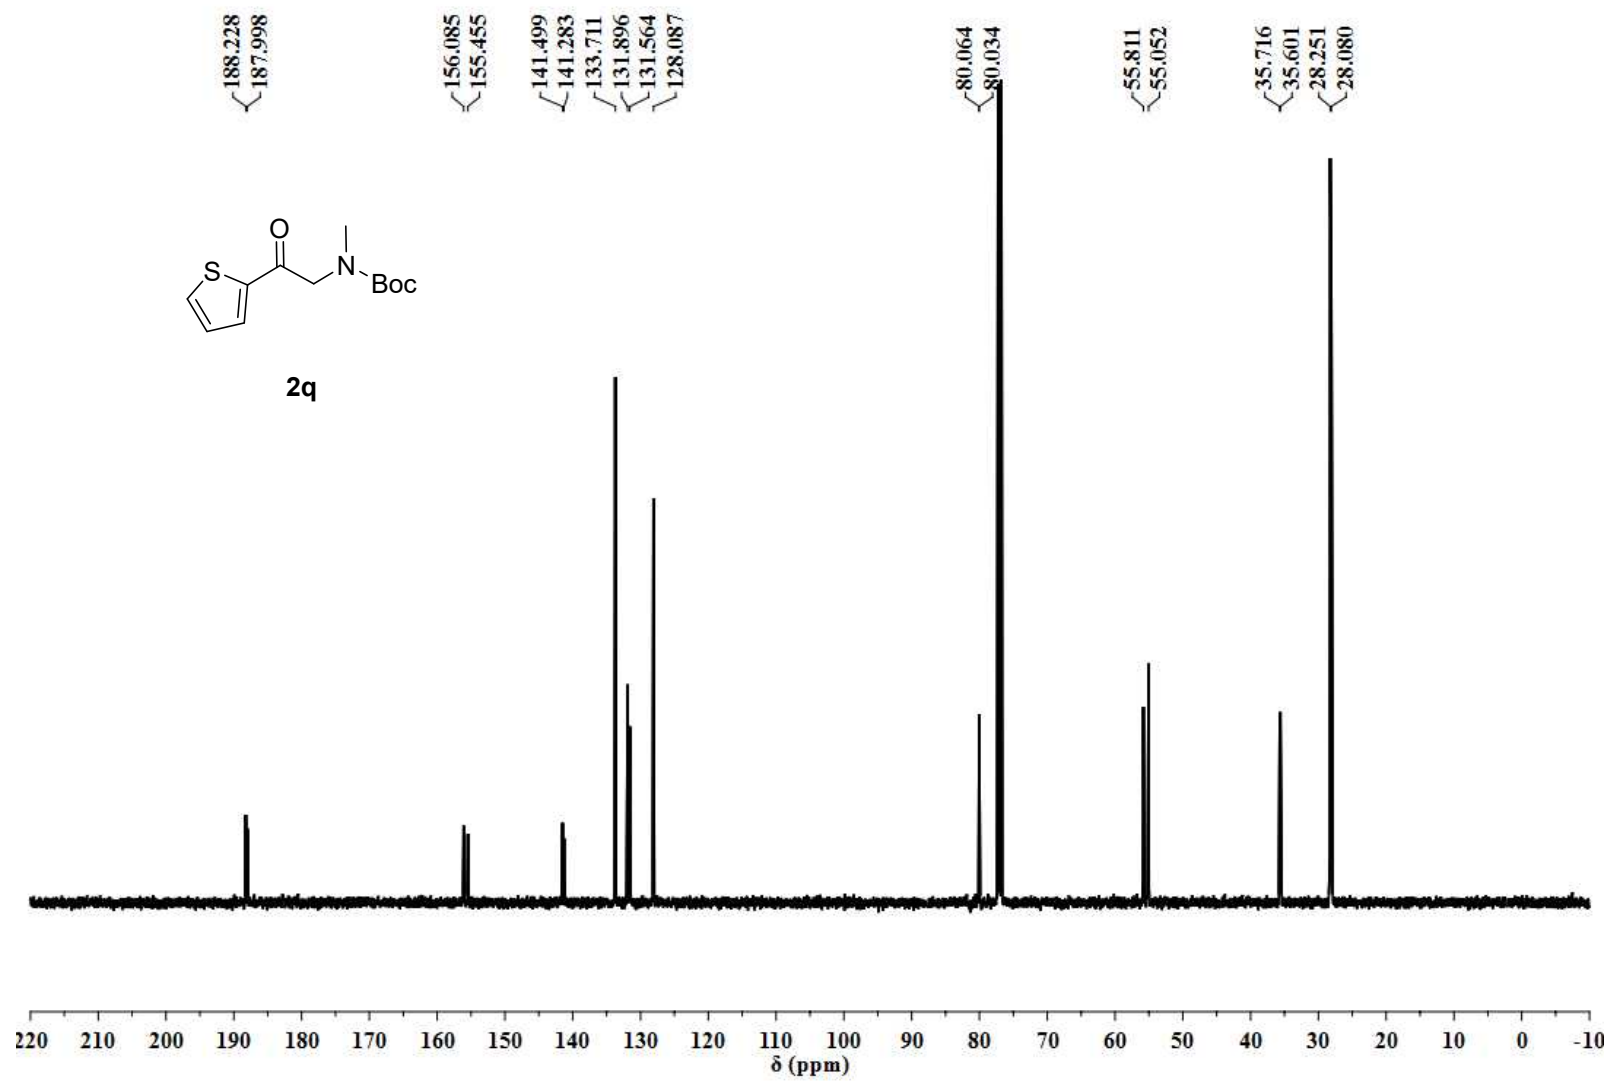

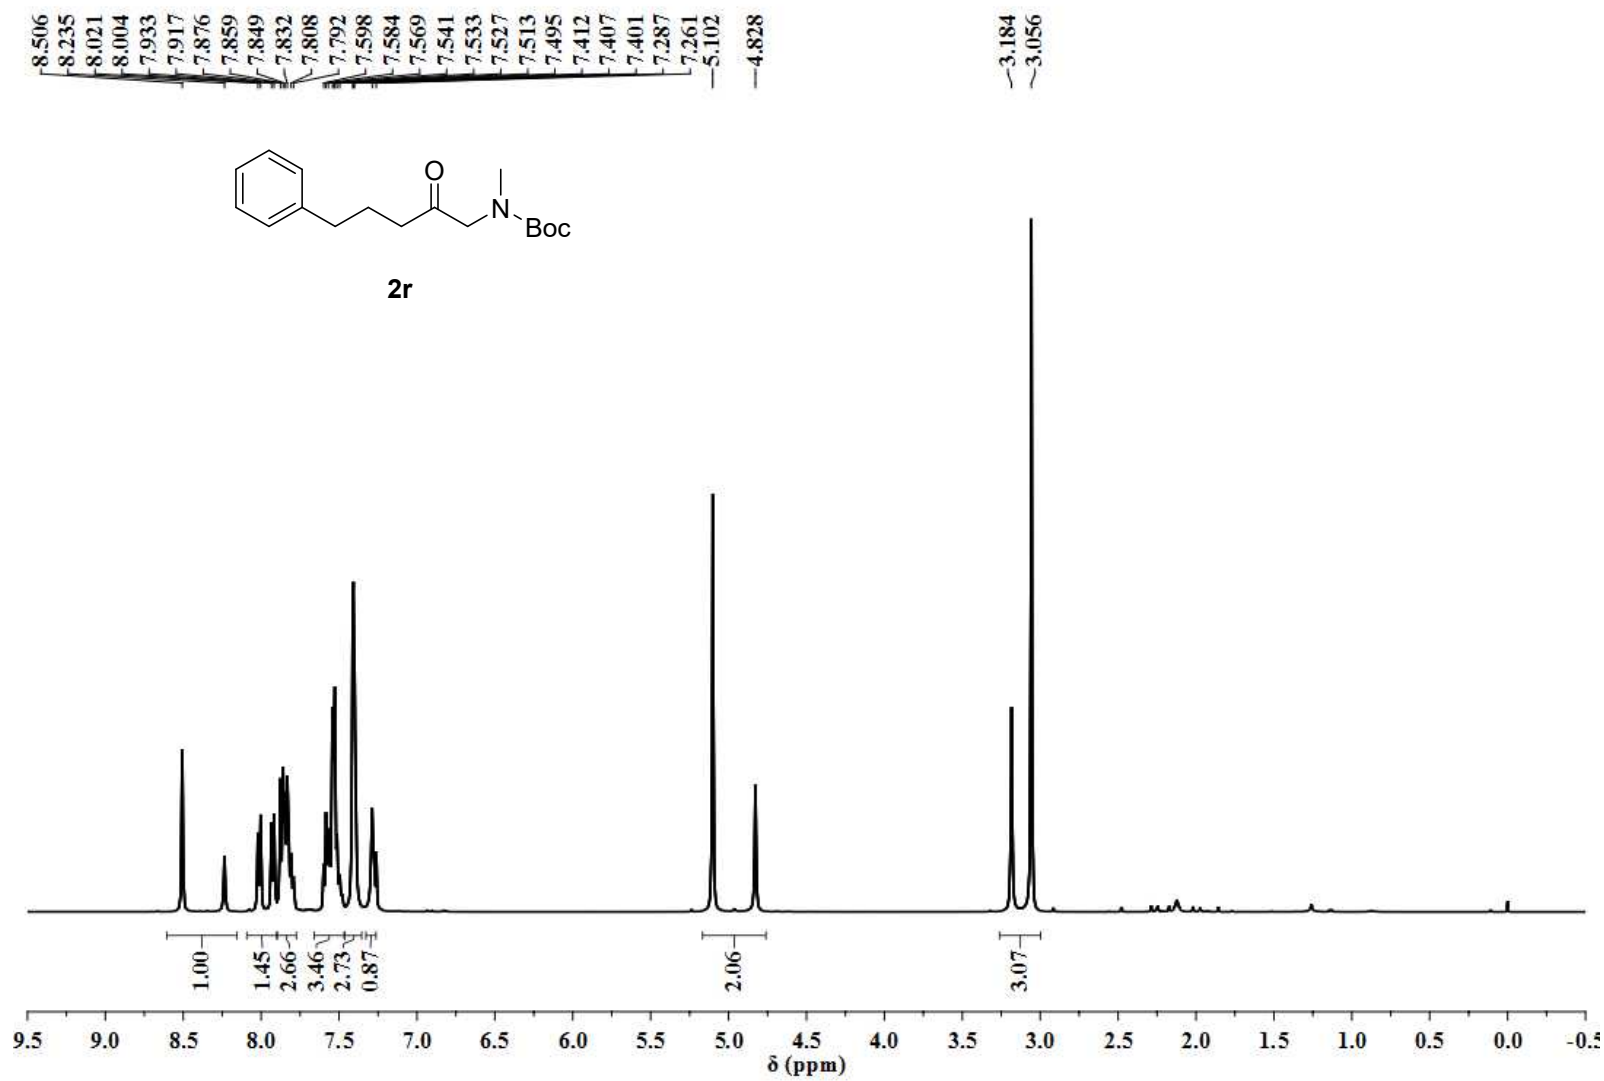

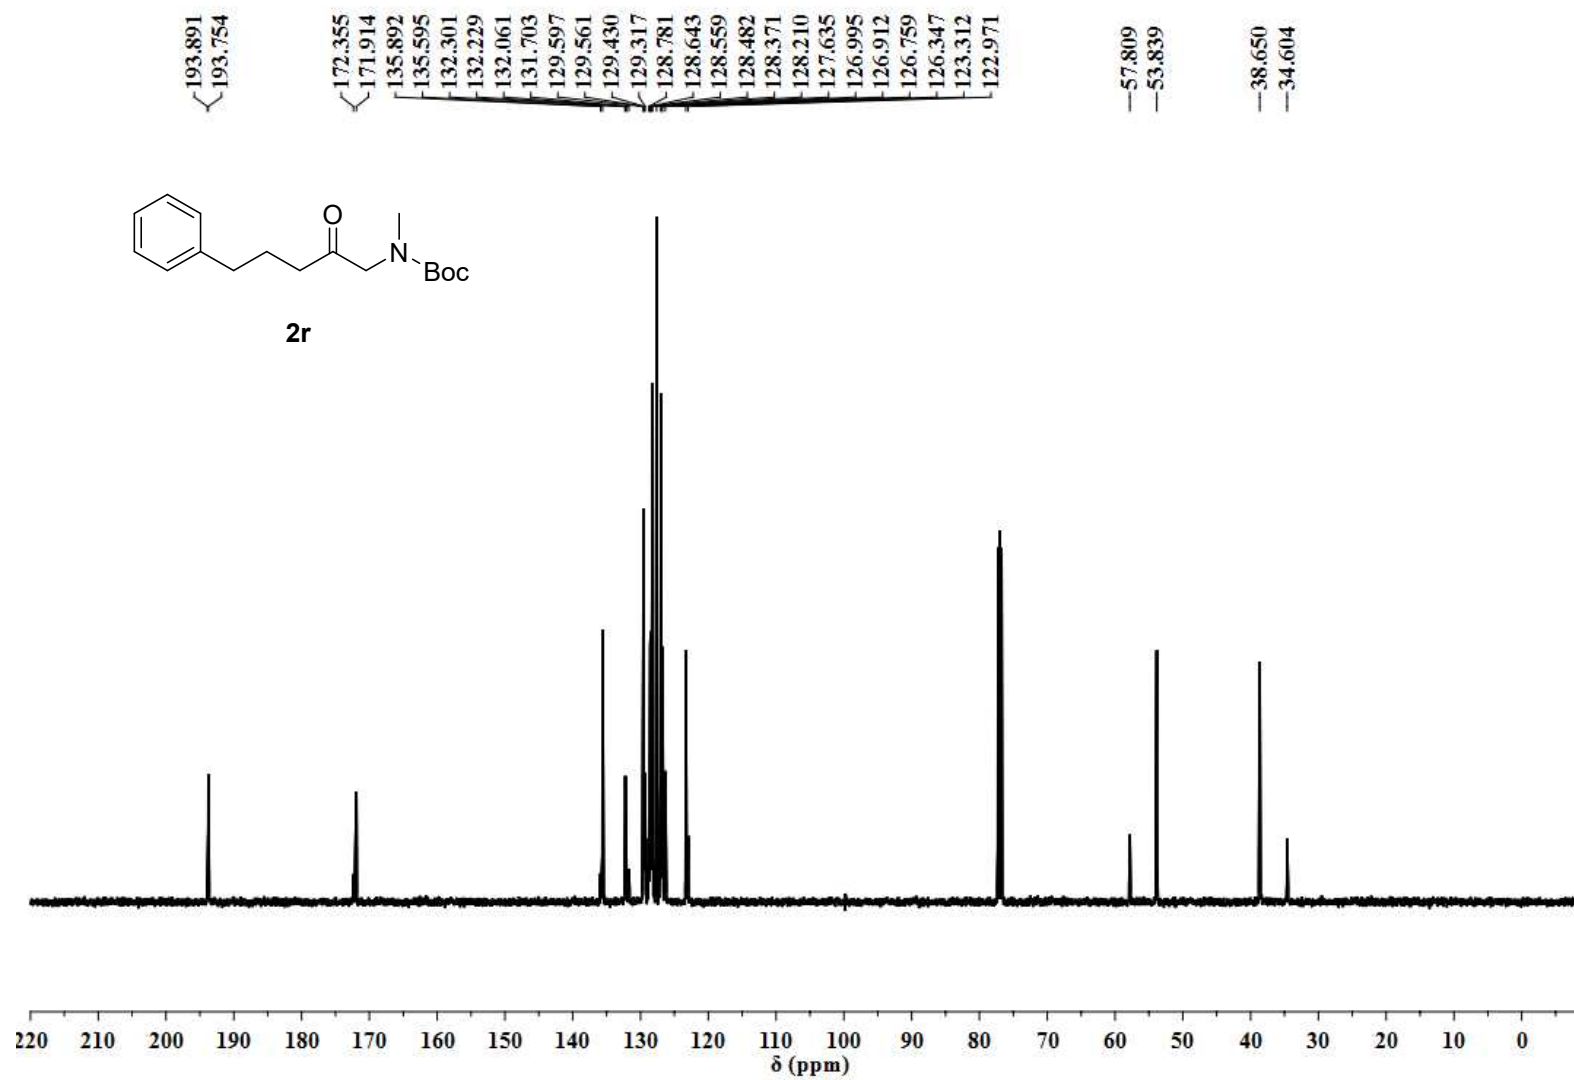

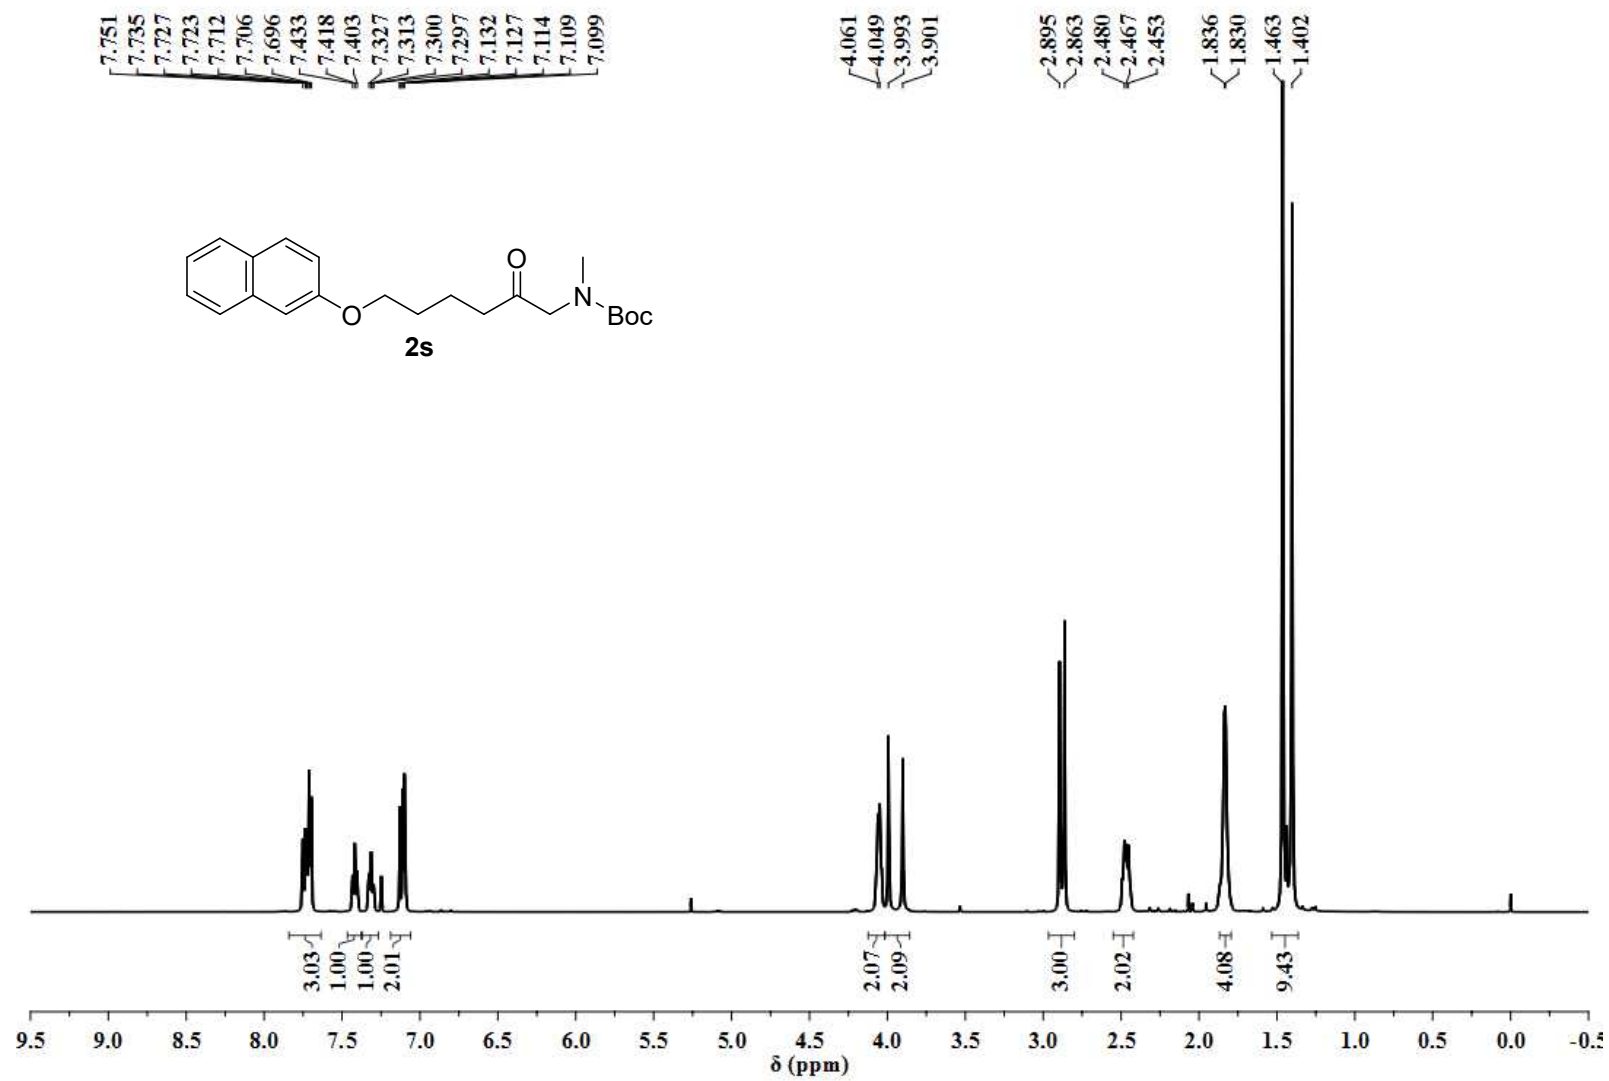

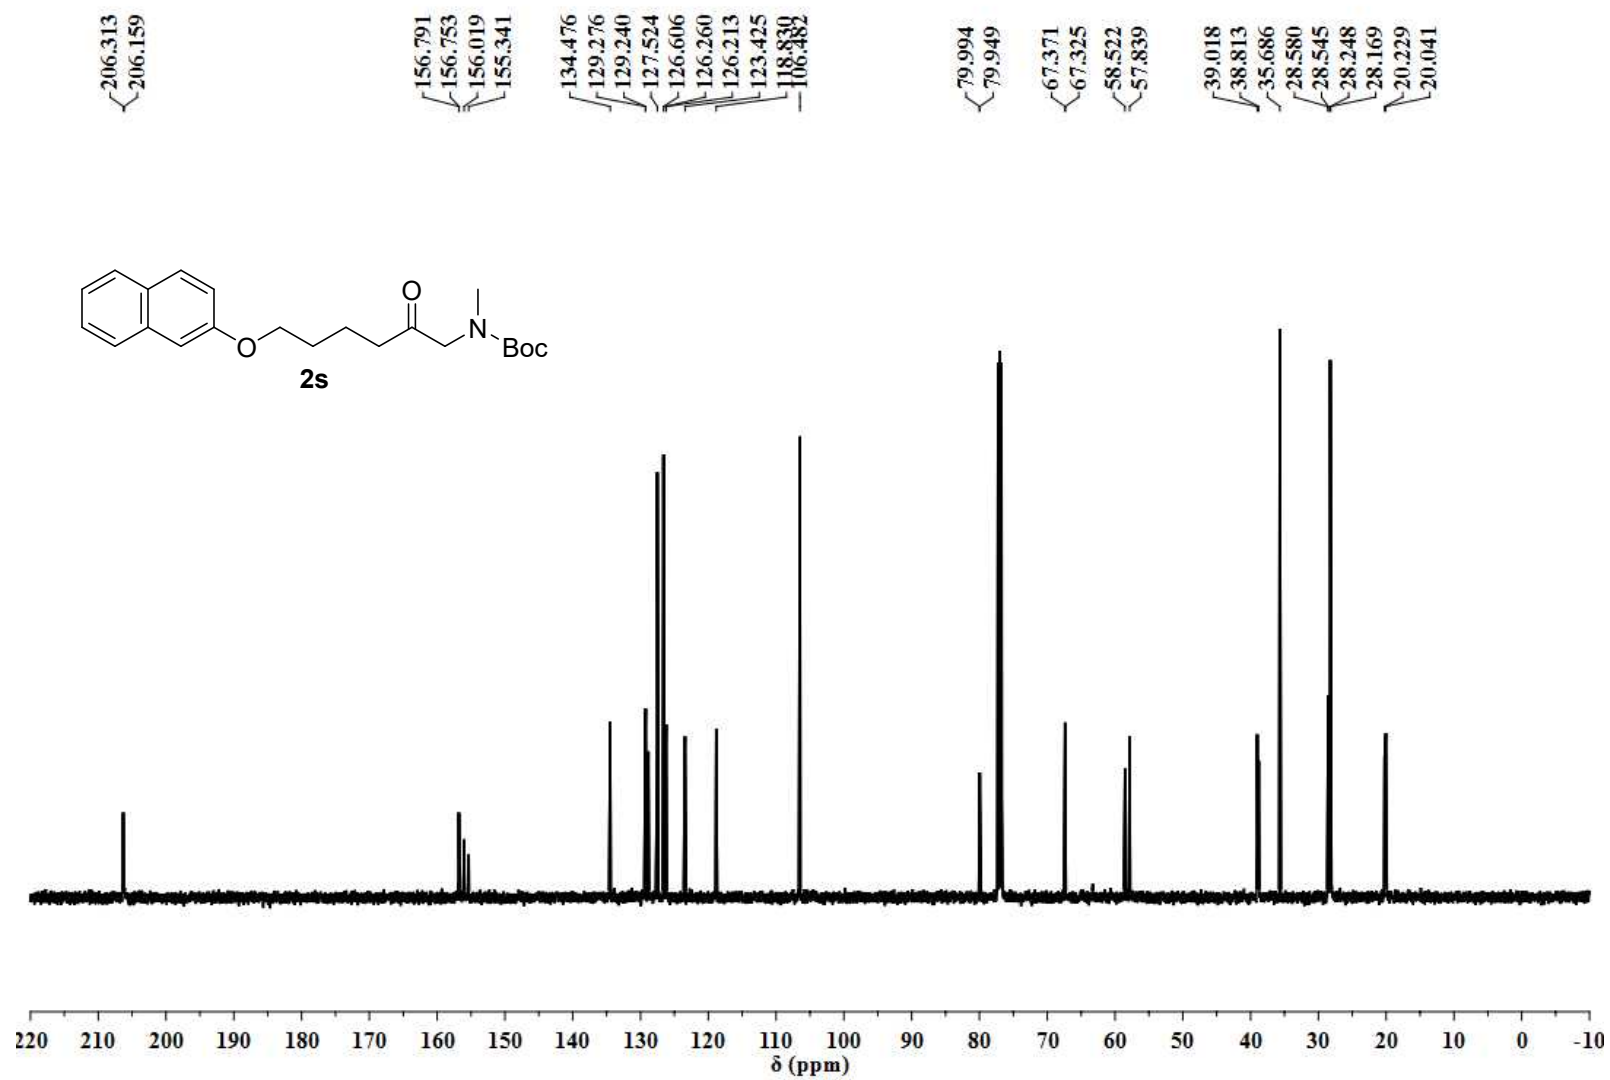

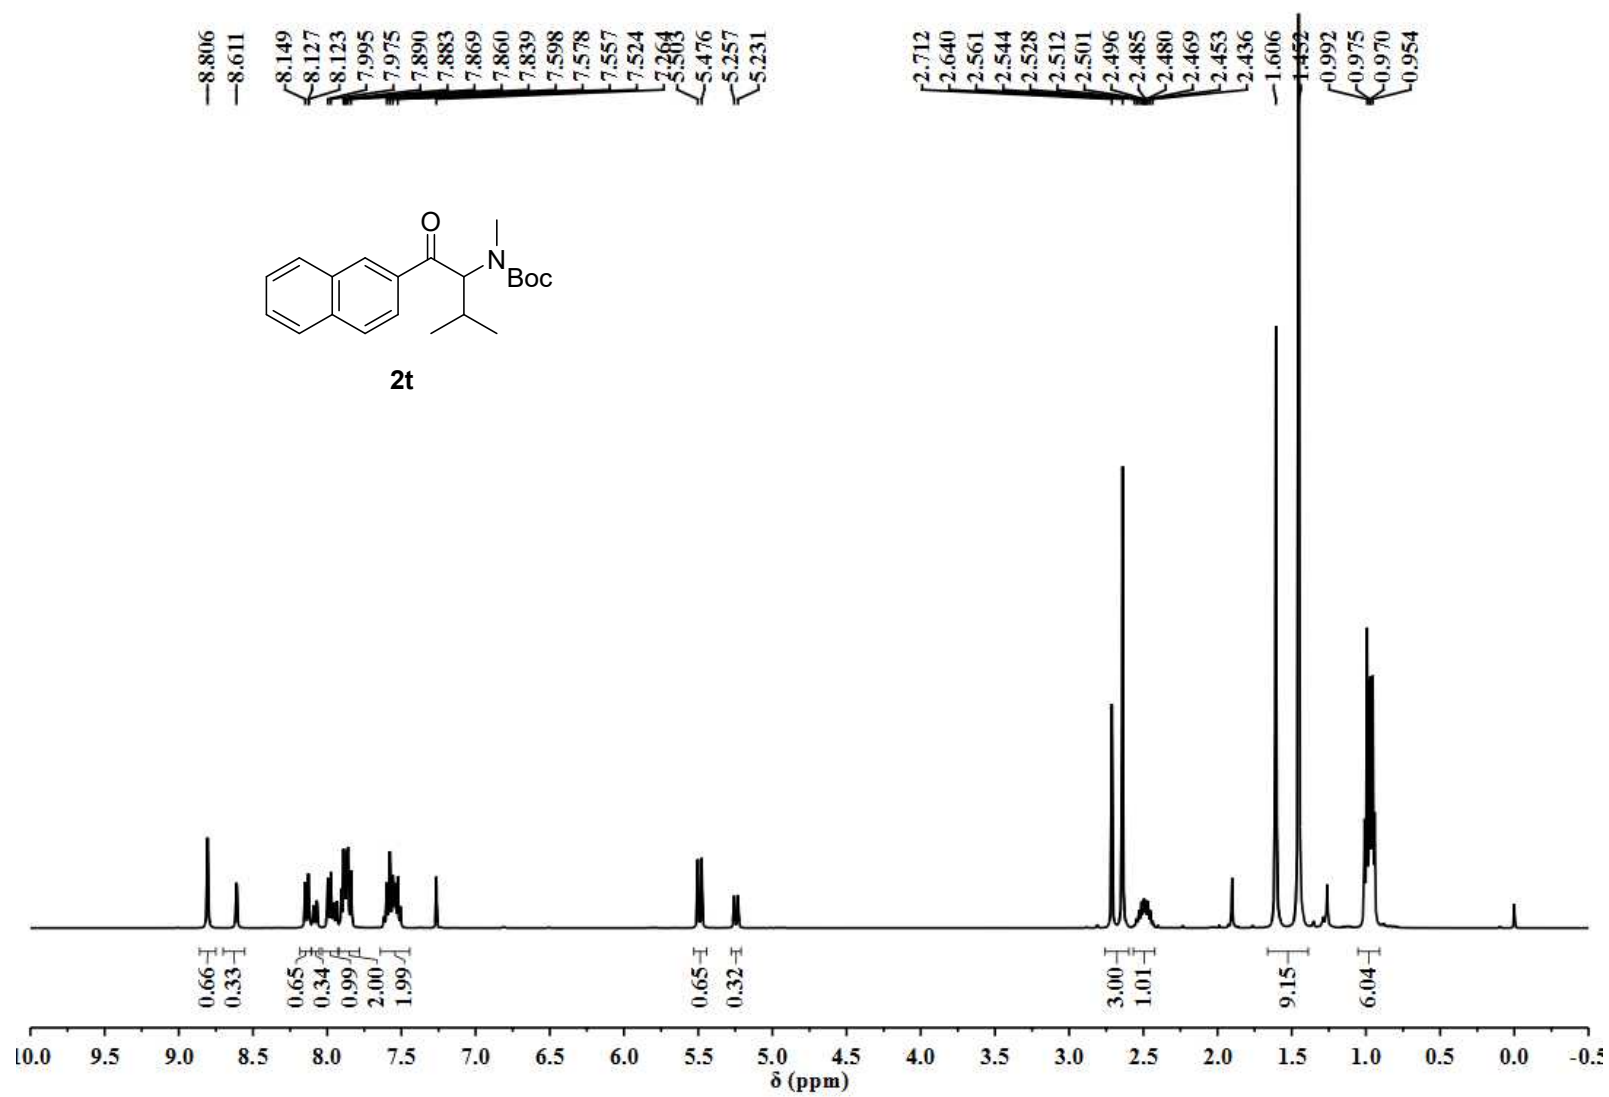

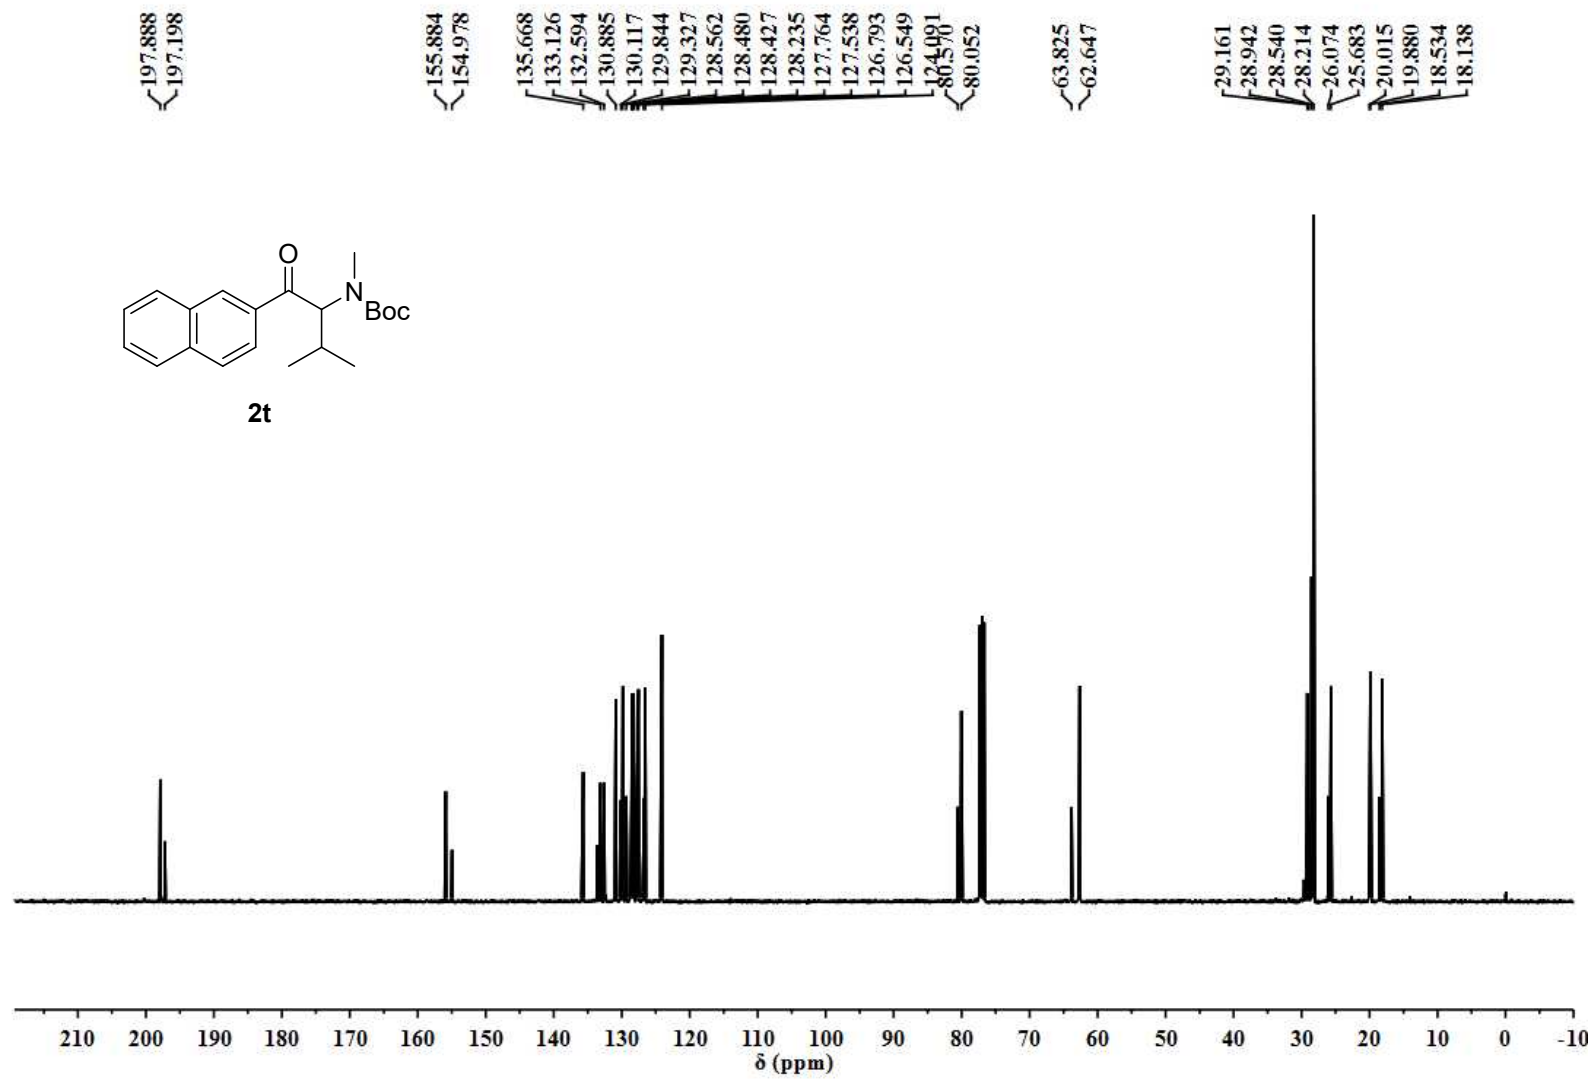

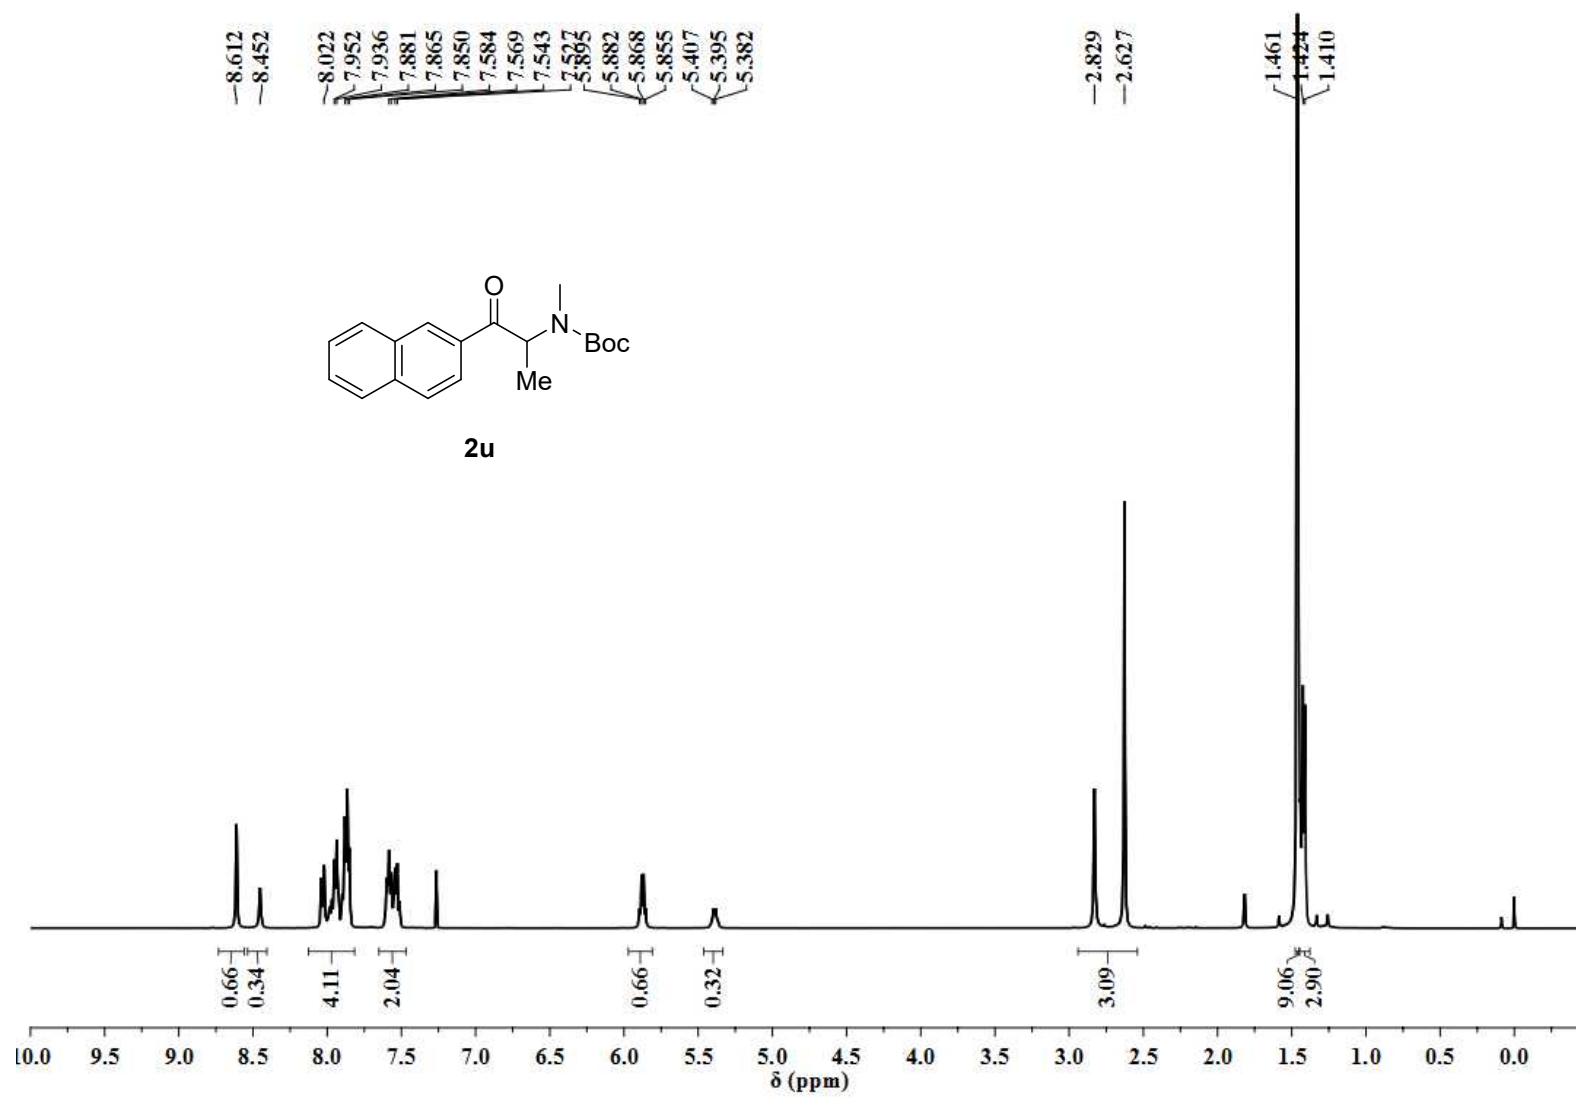

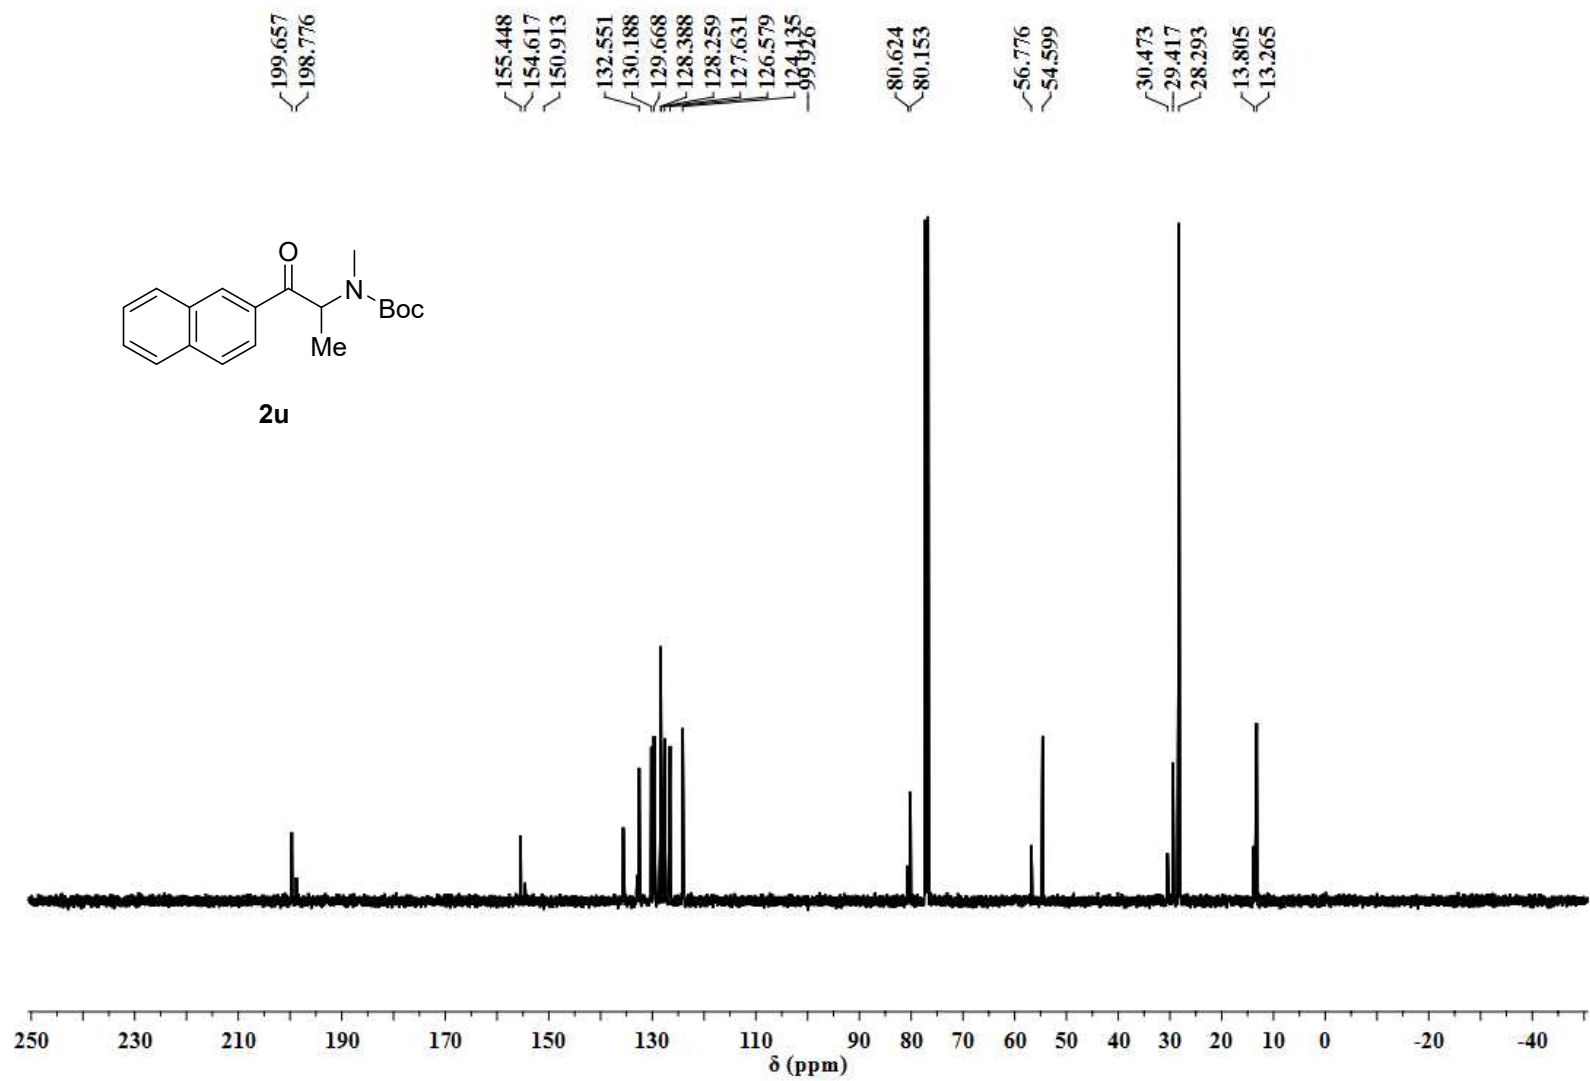

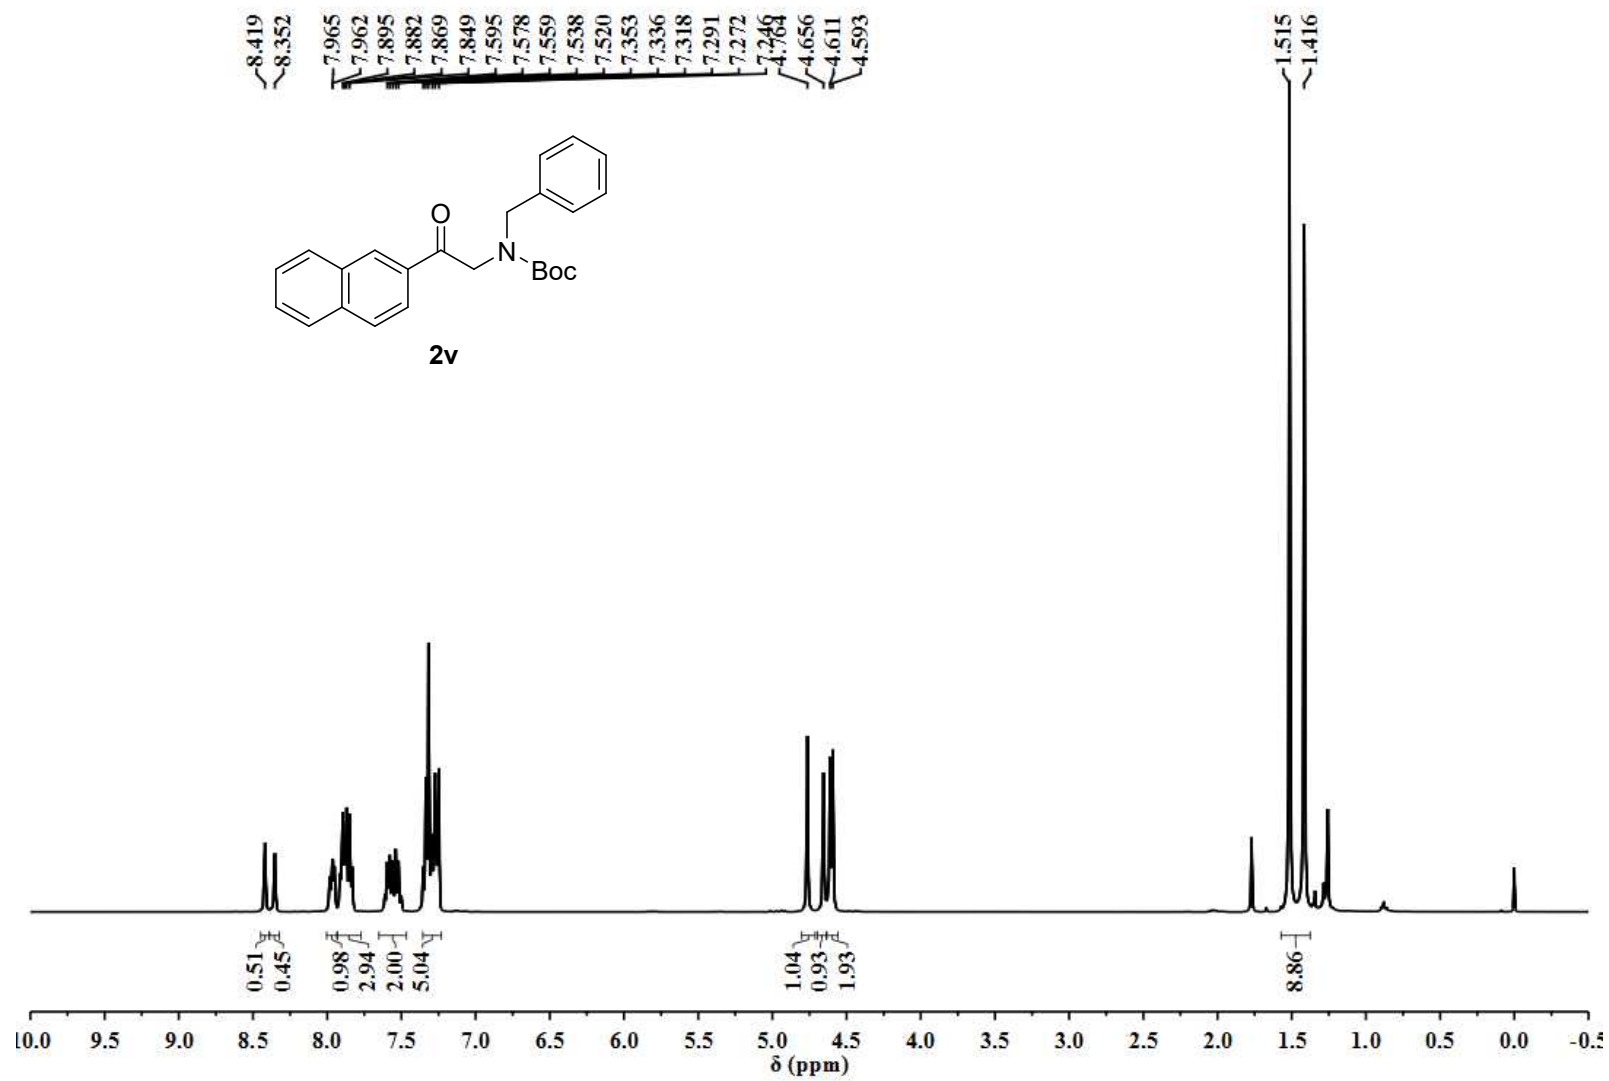

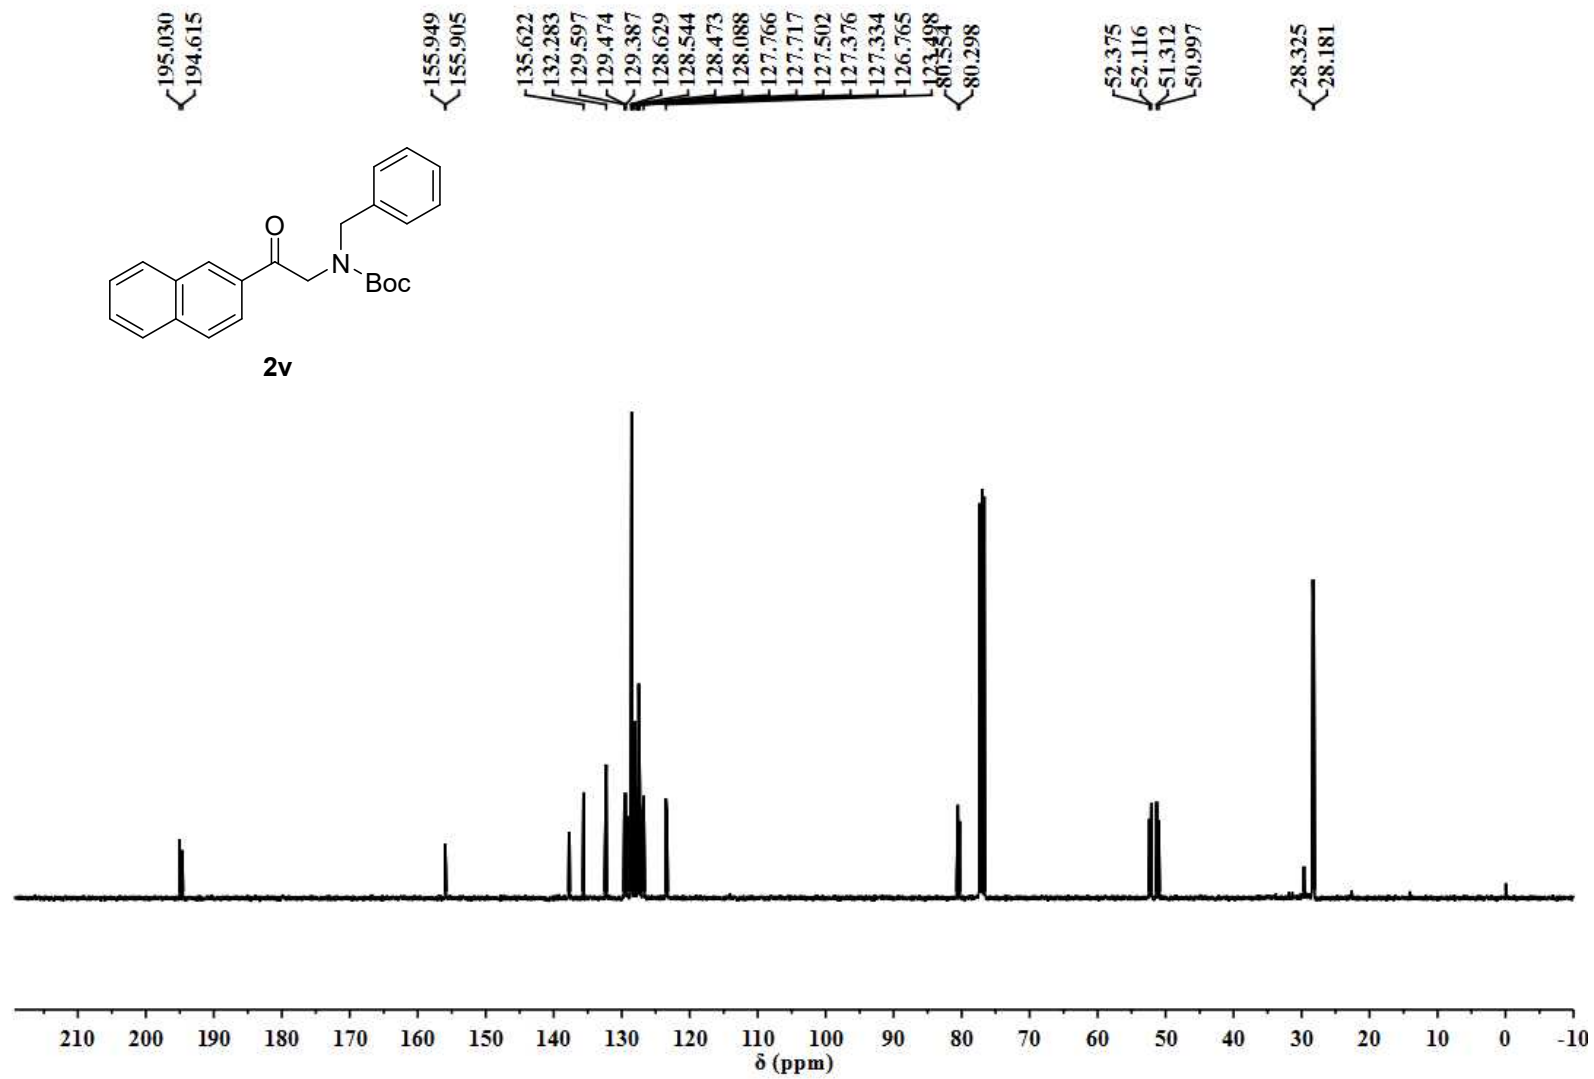

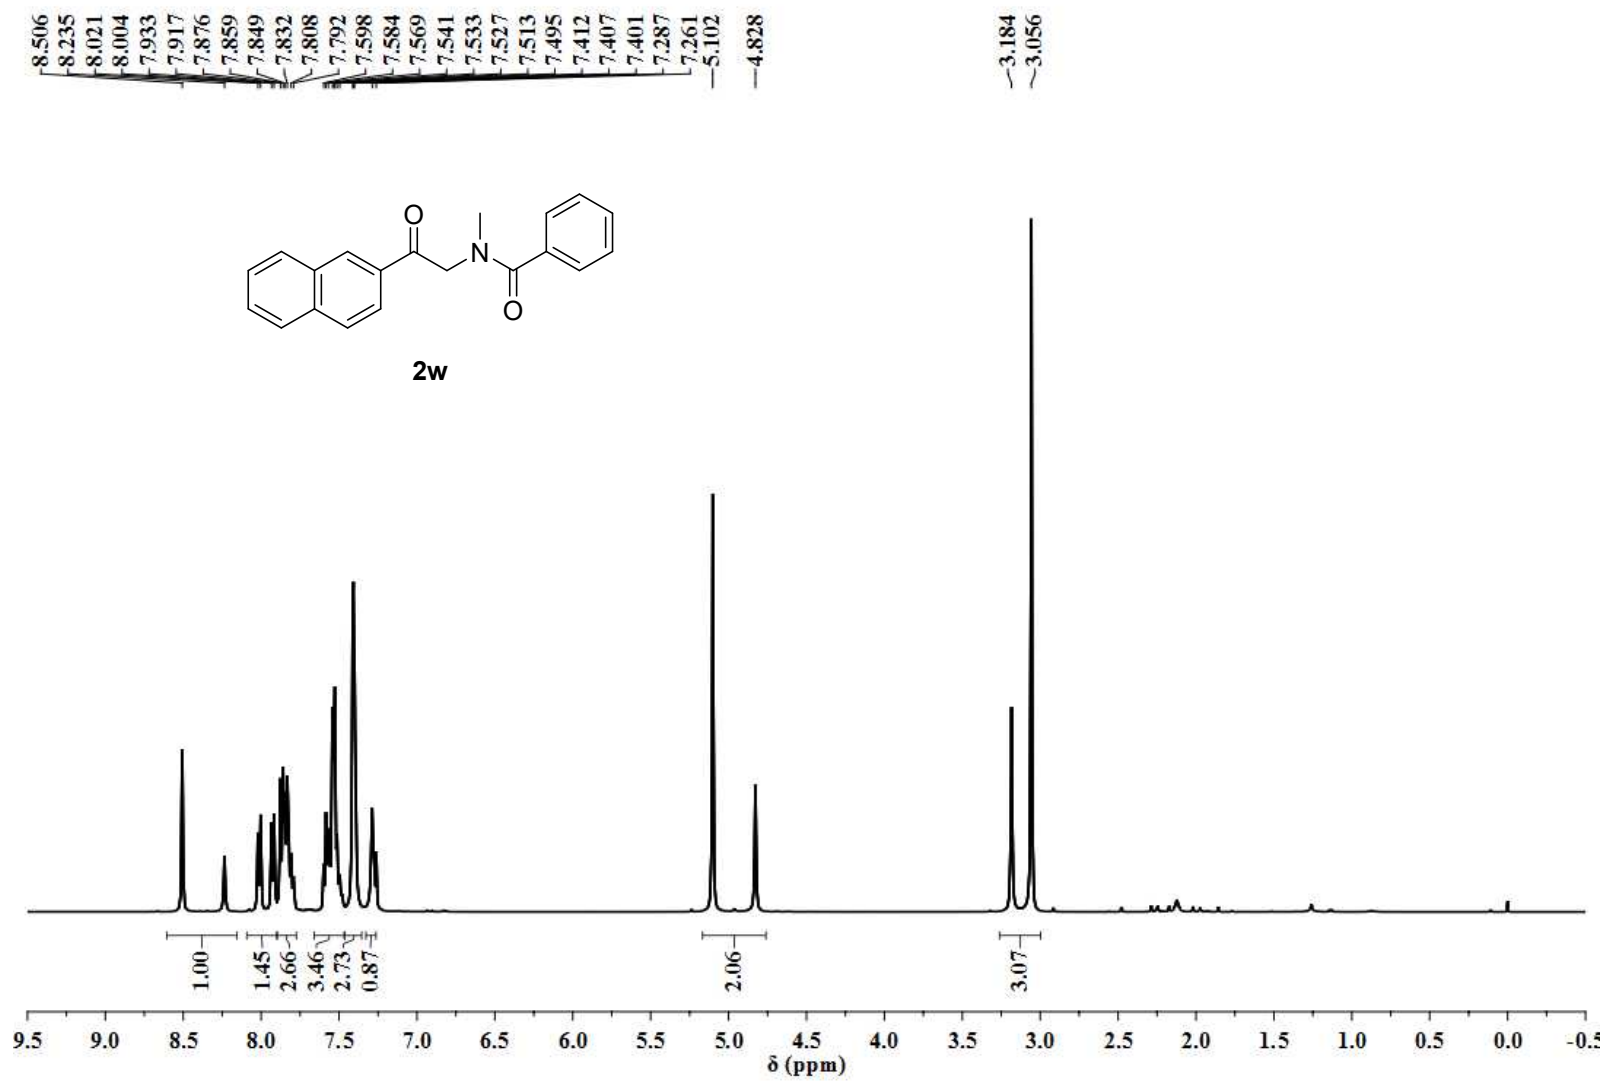

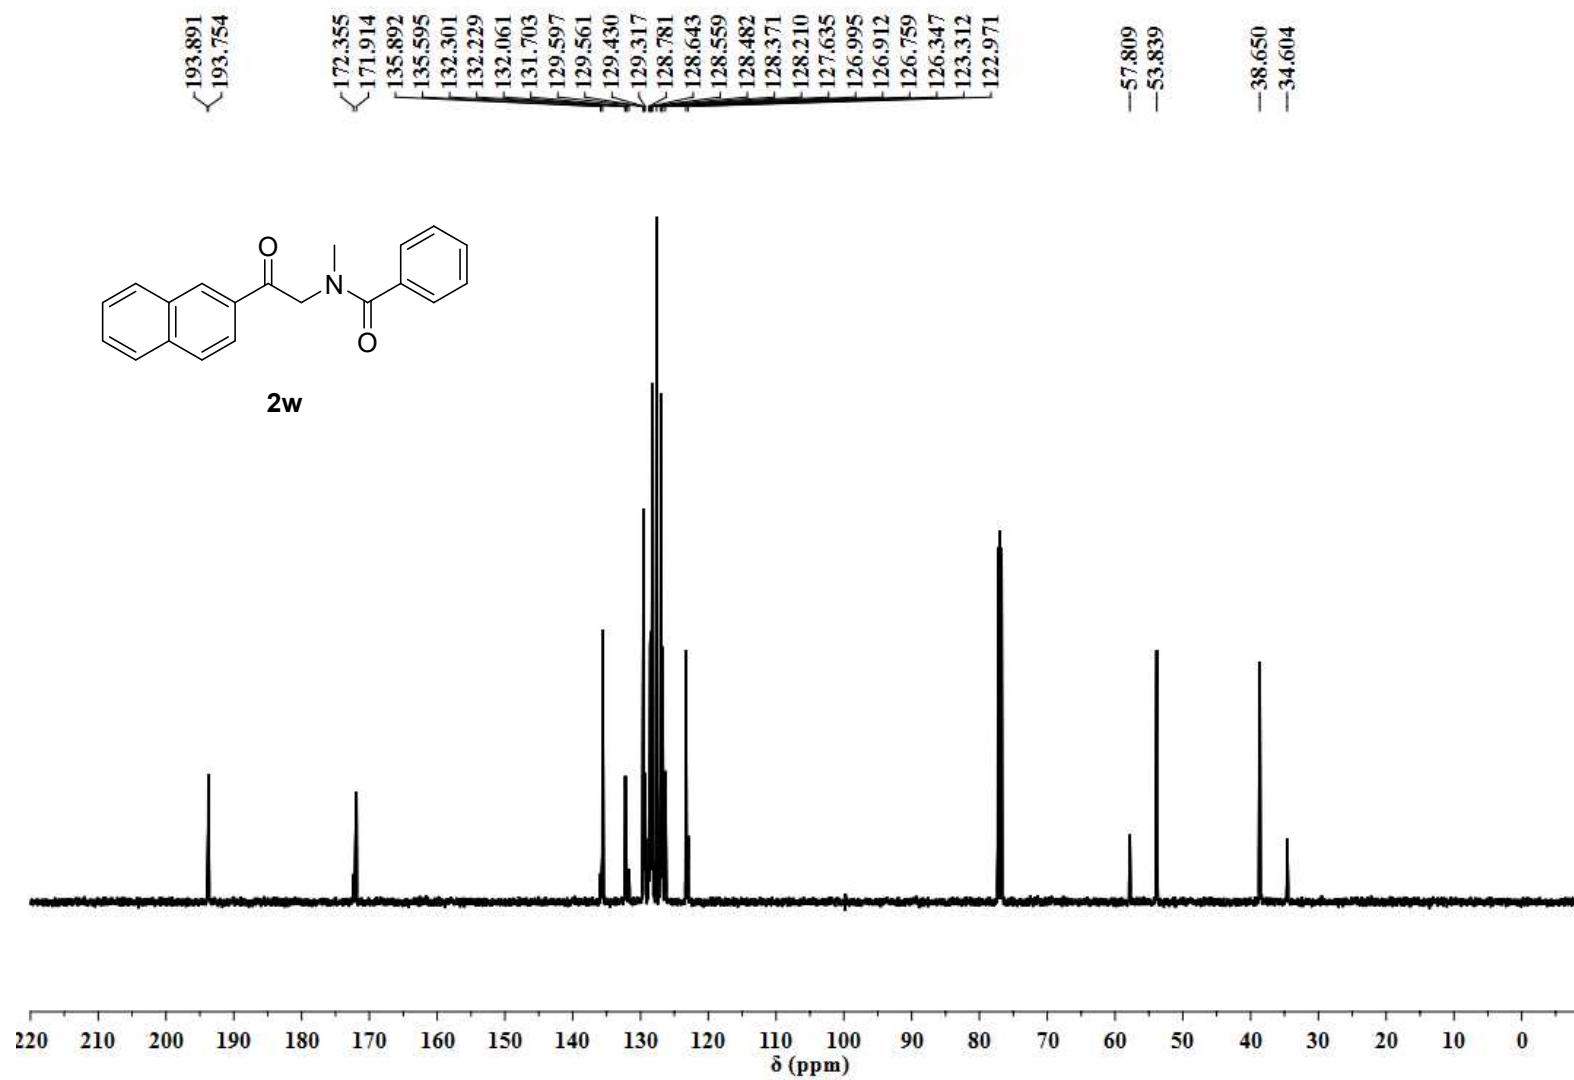

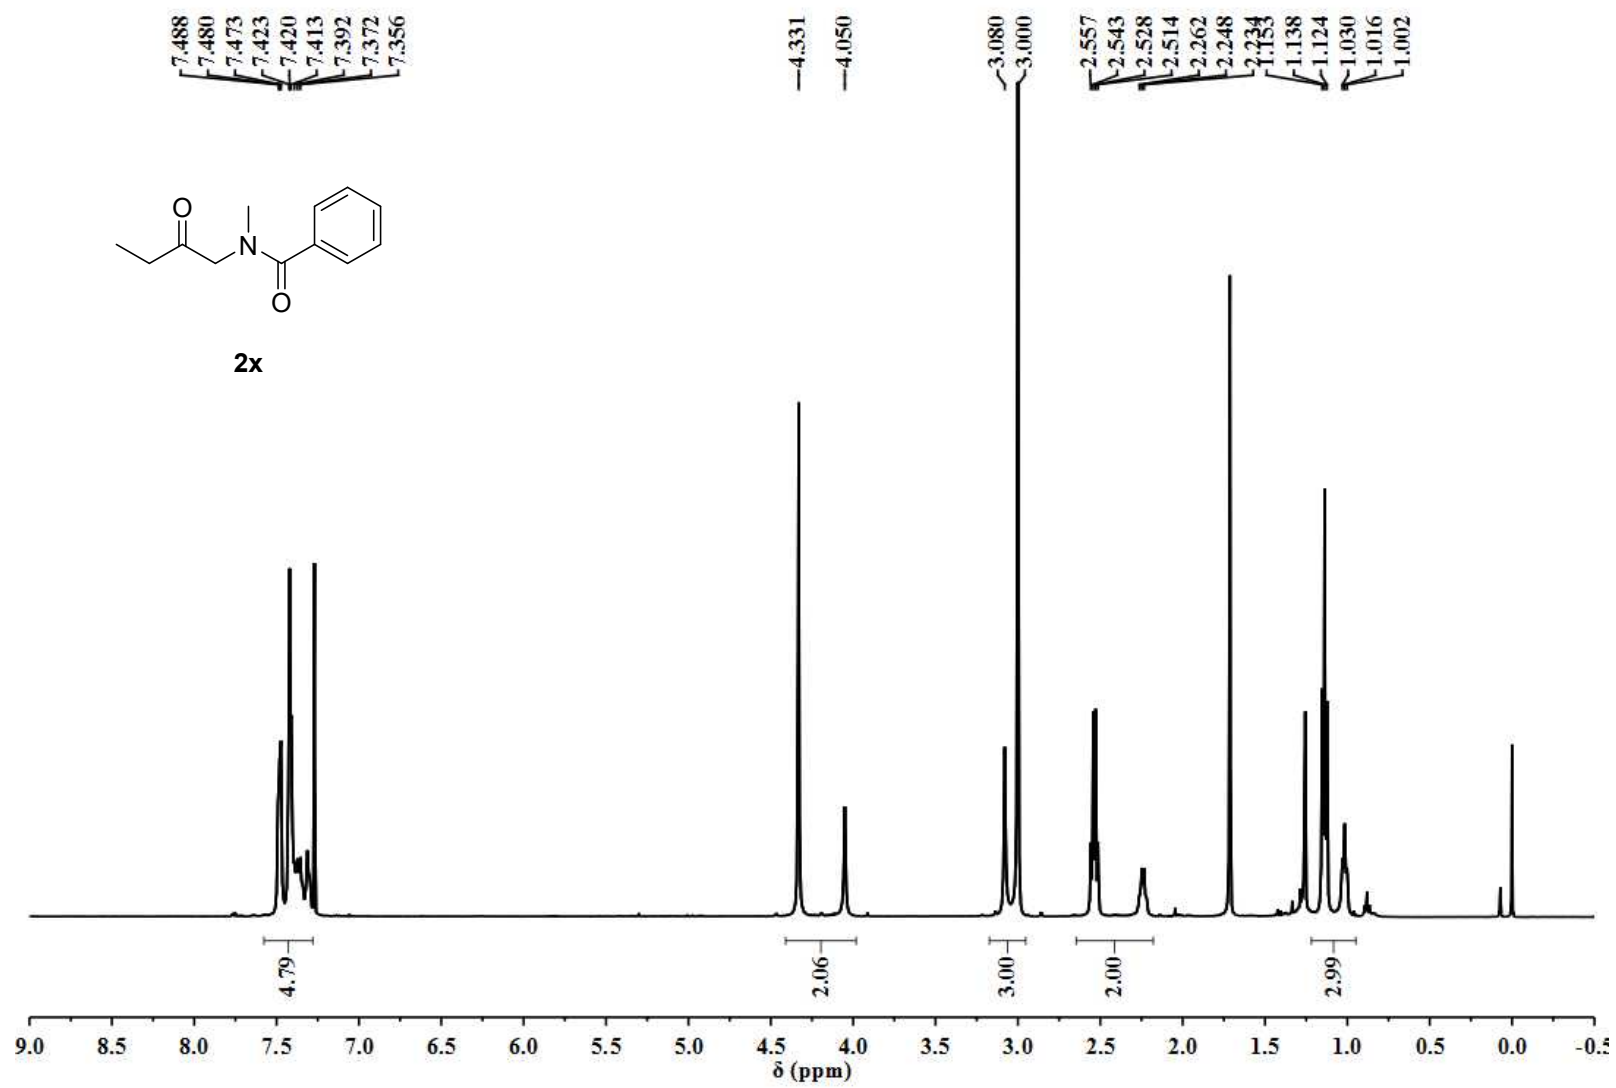

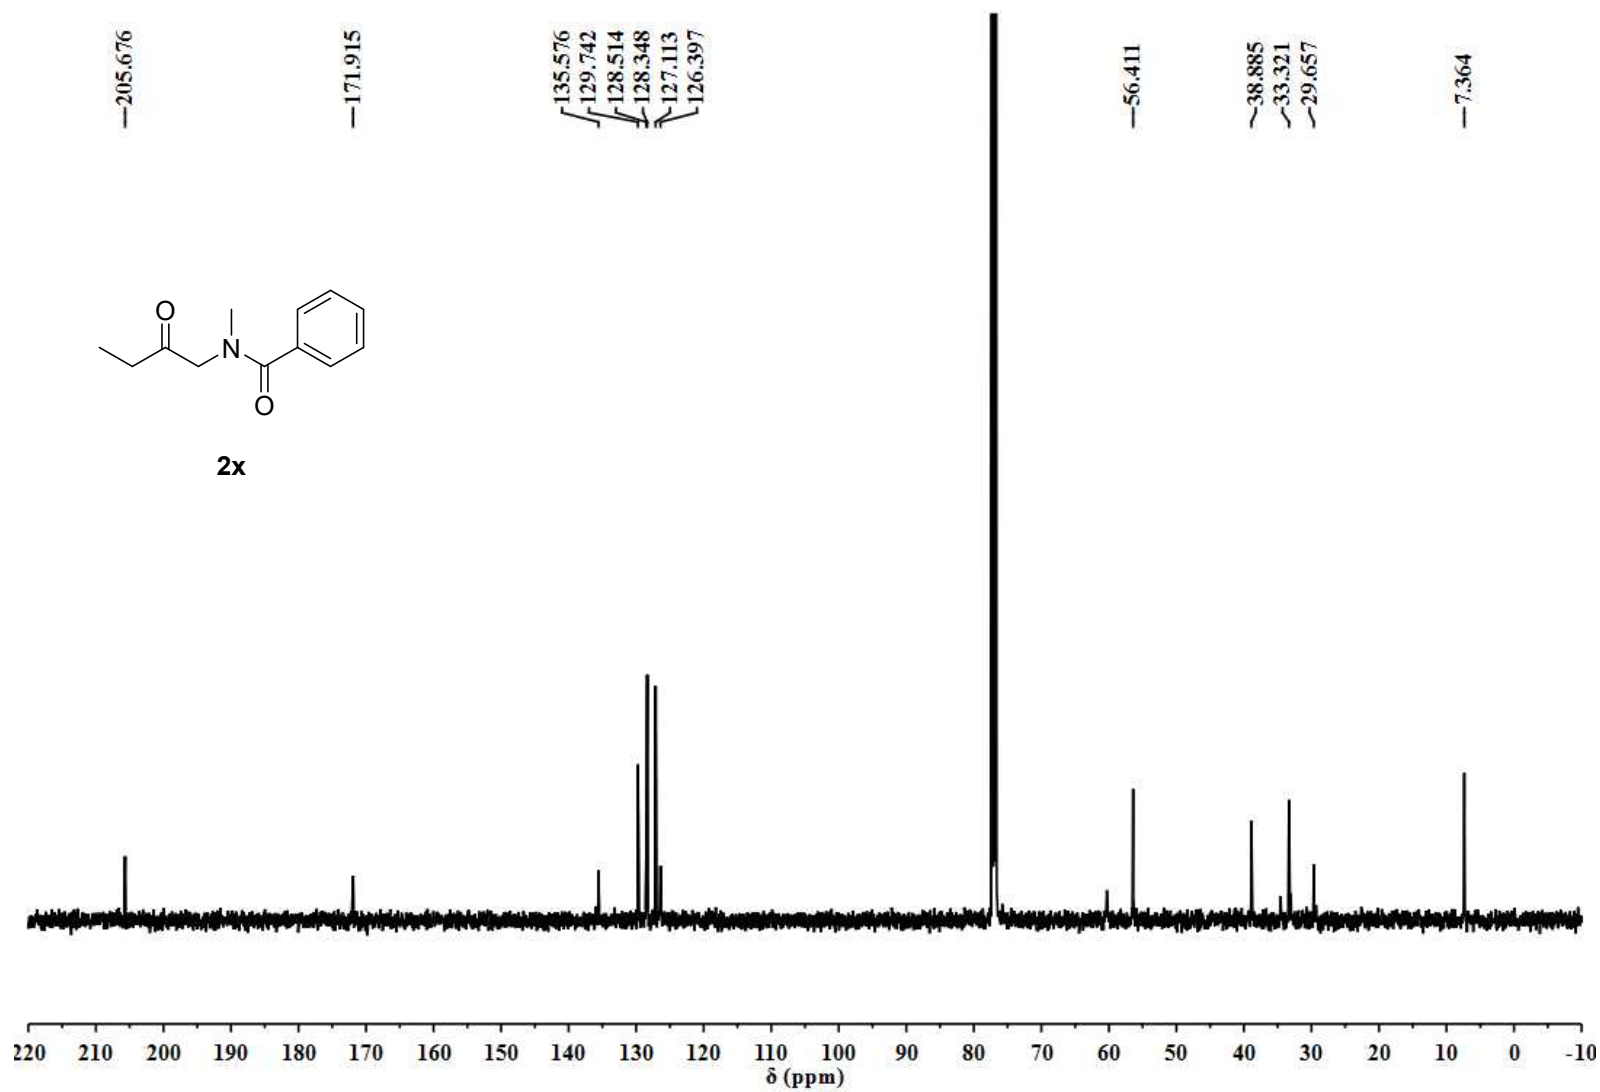

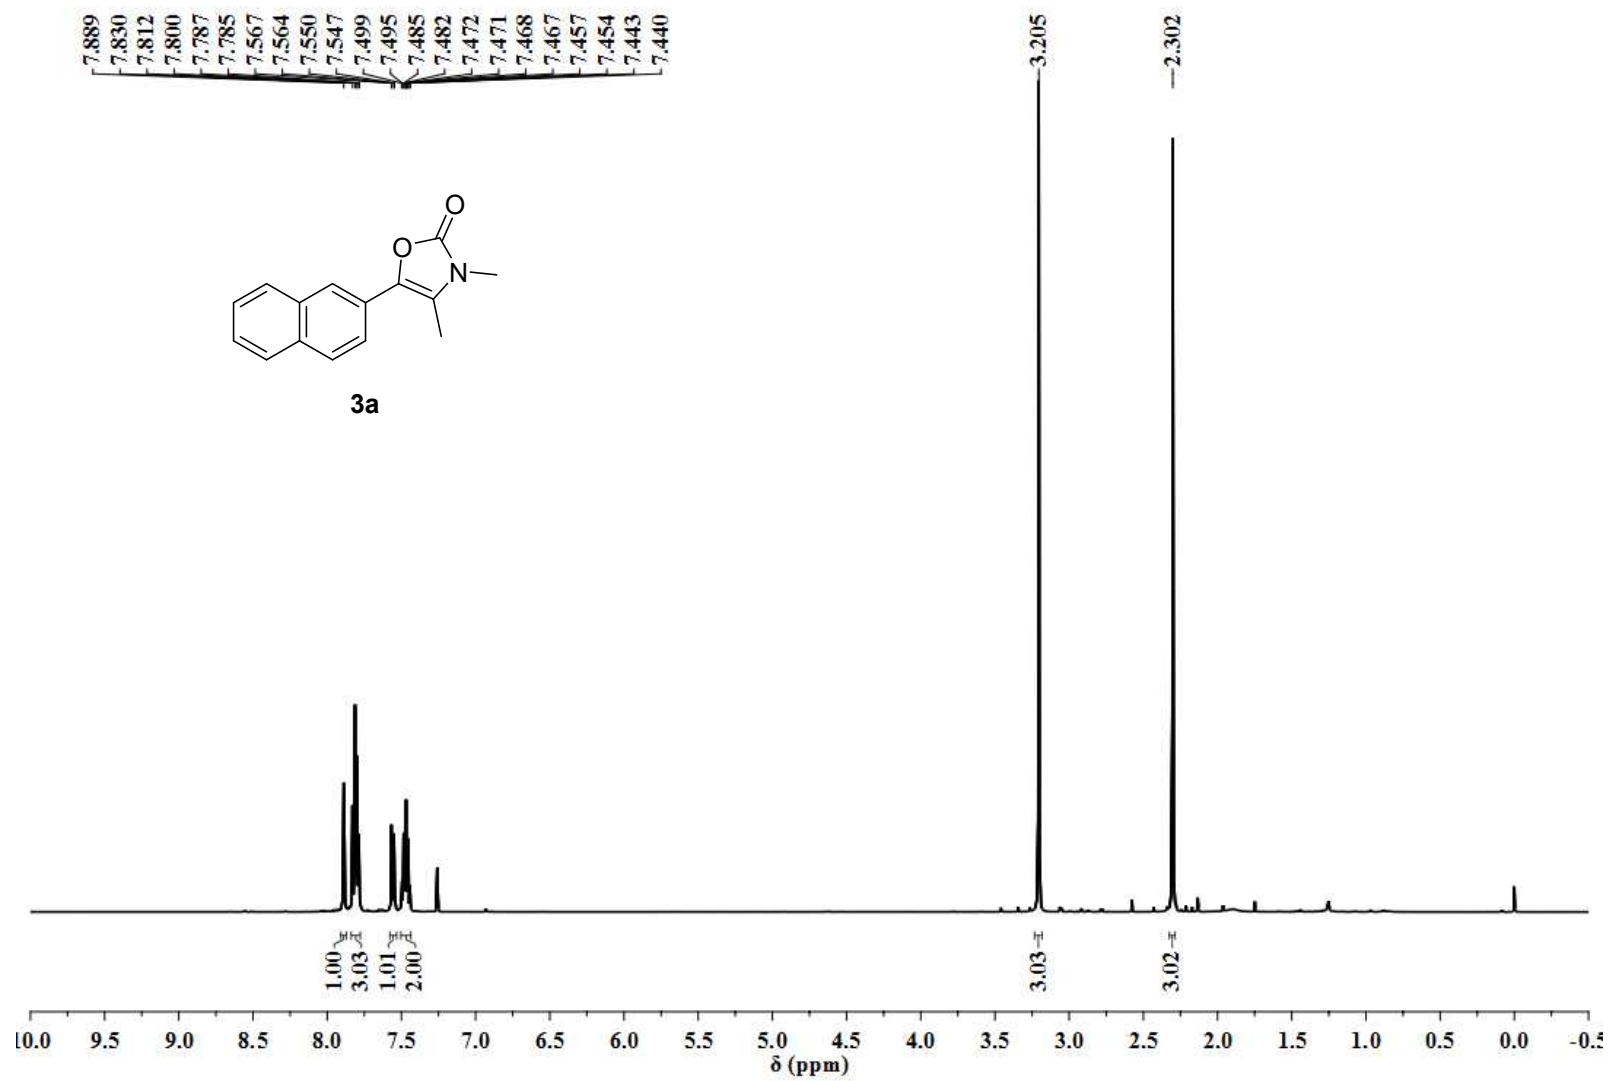

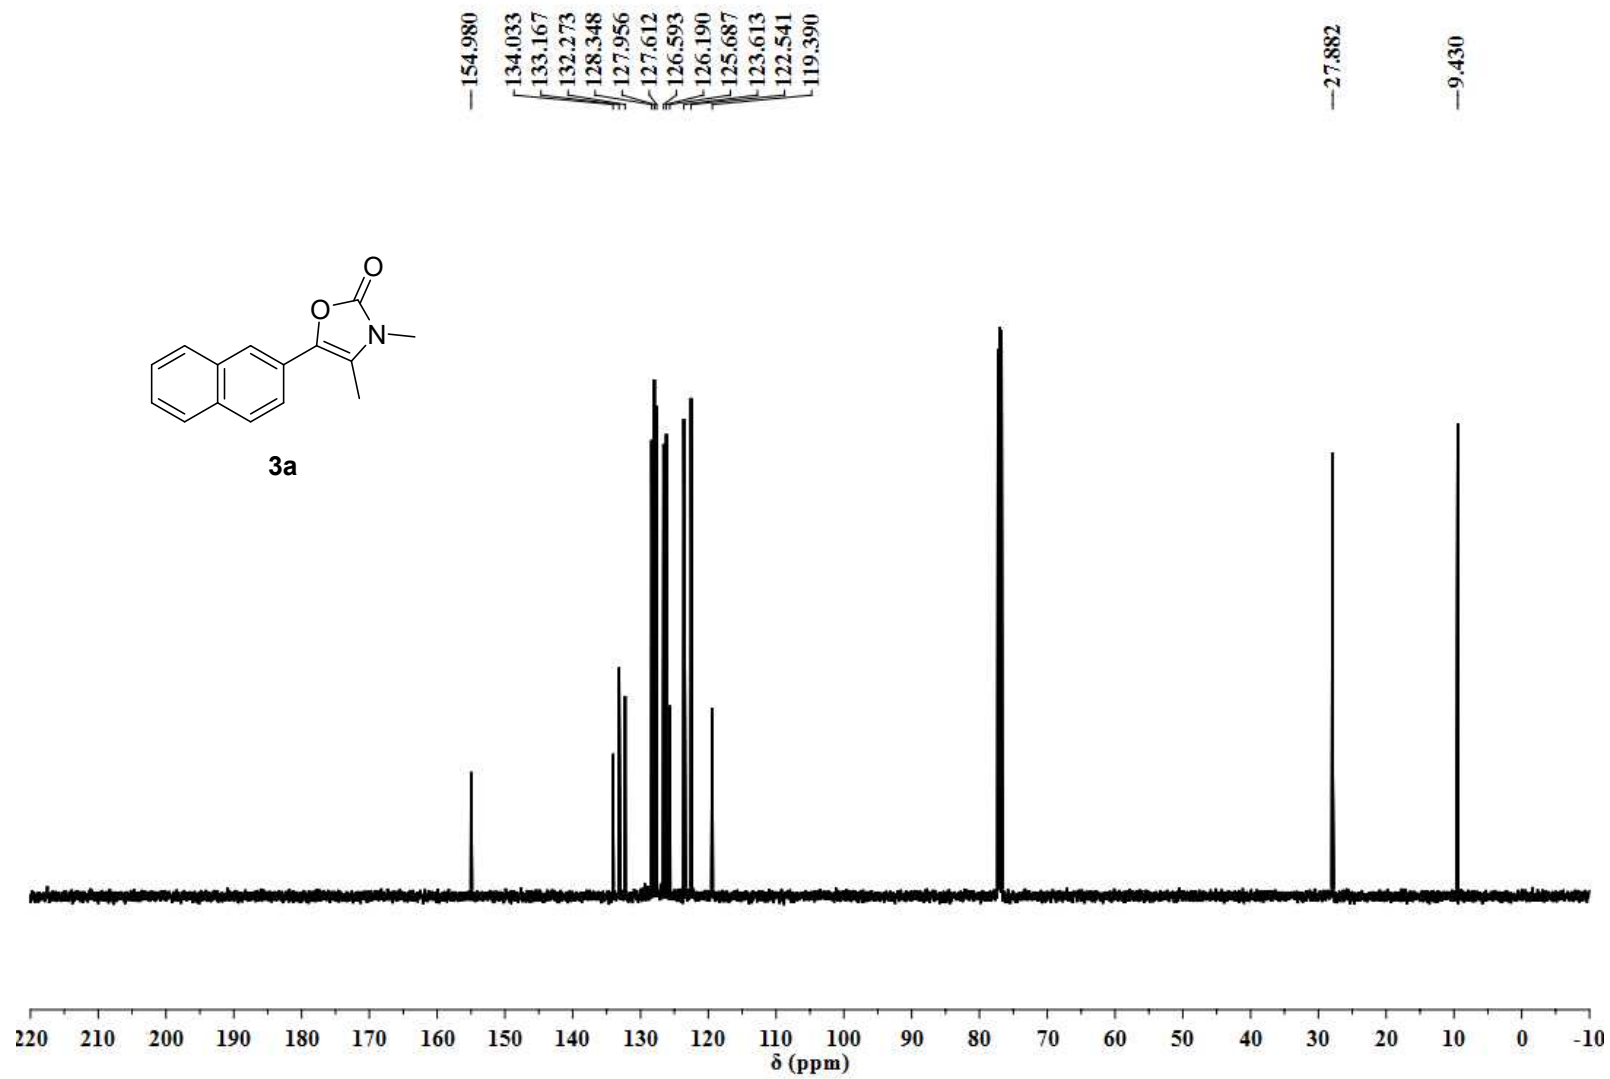

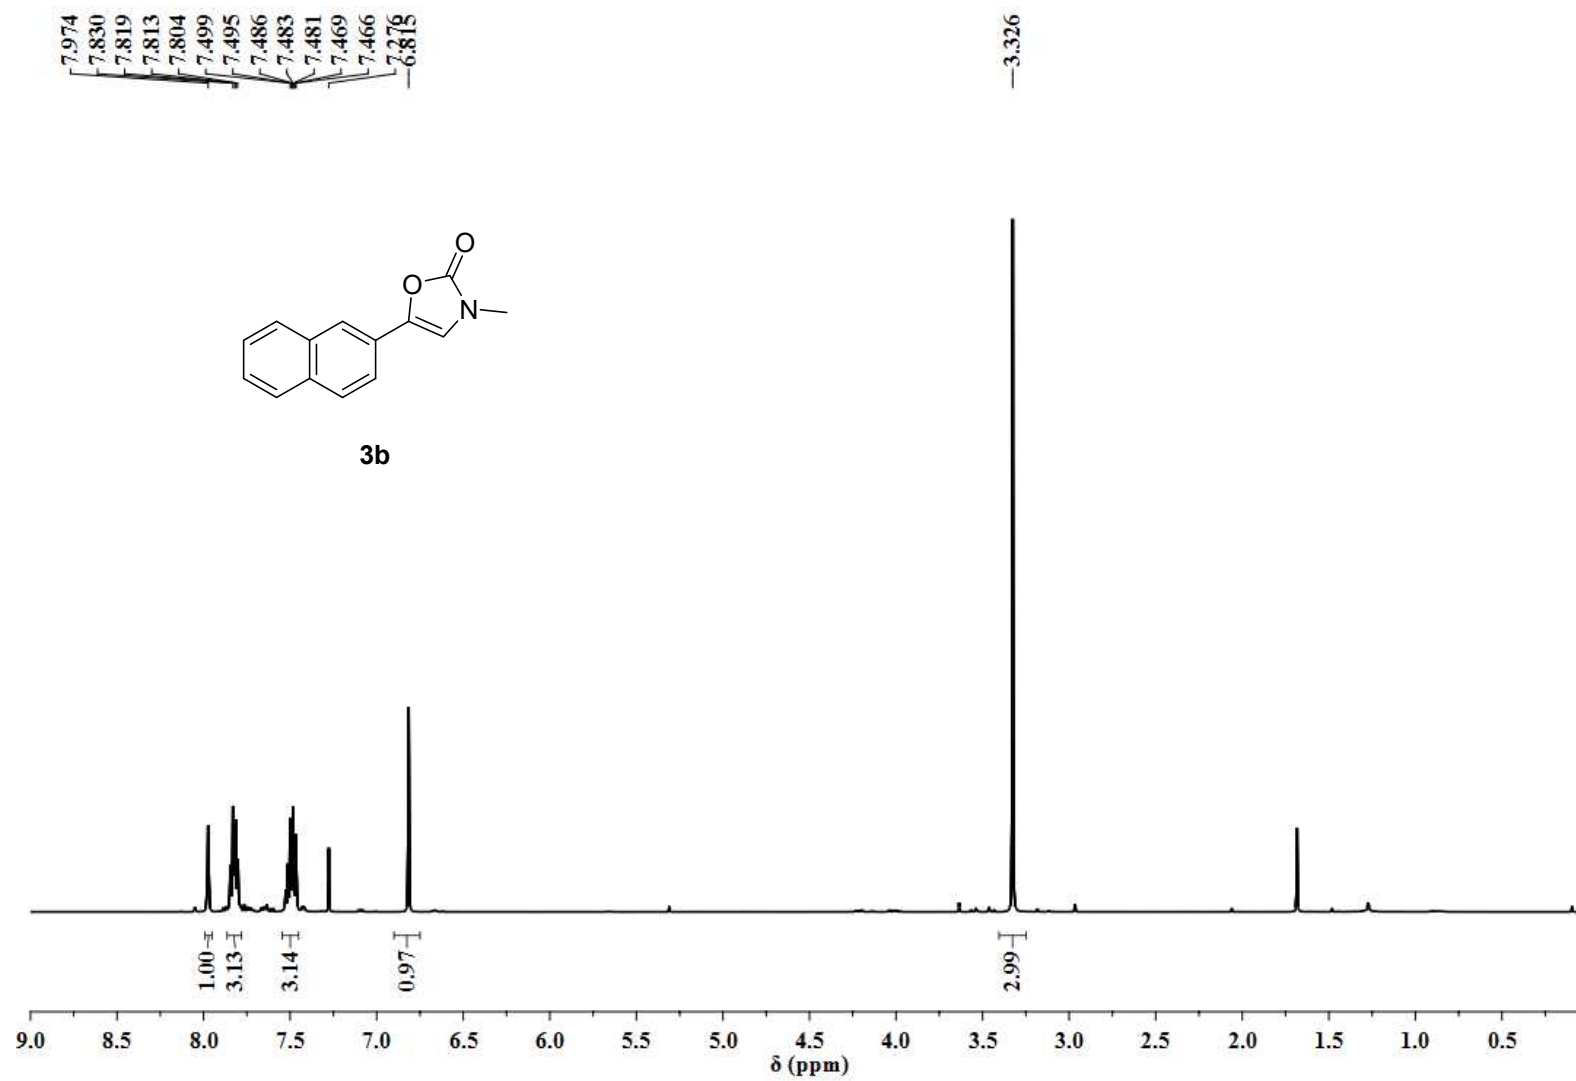

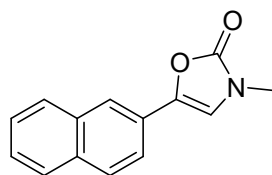

**3b**

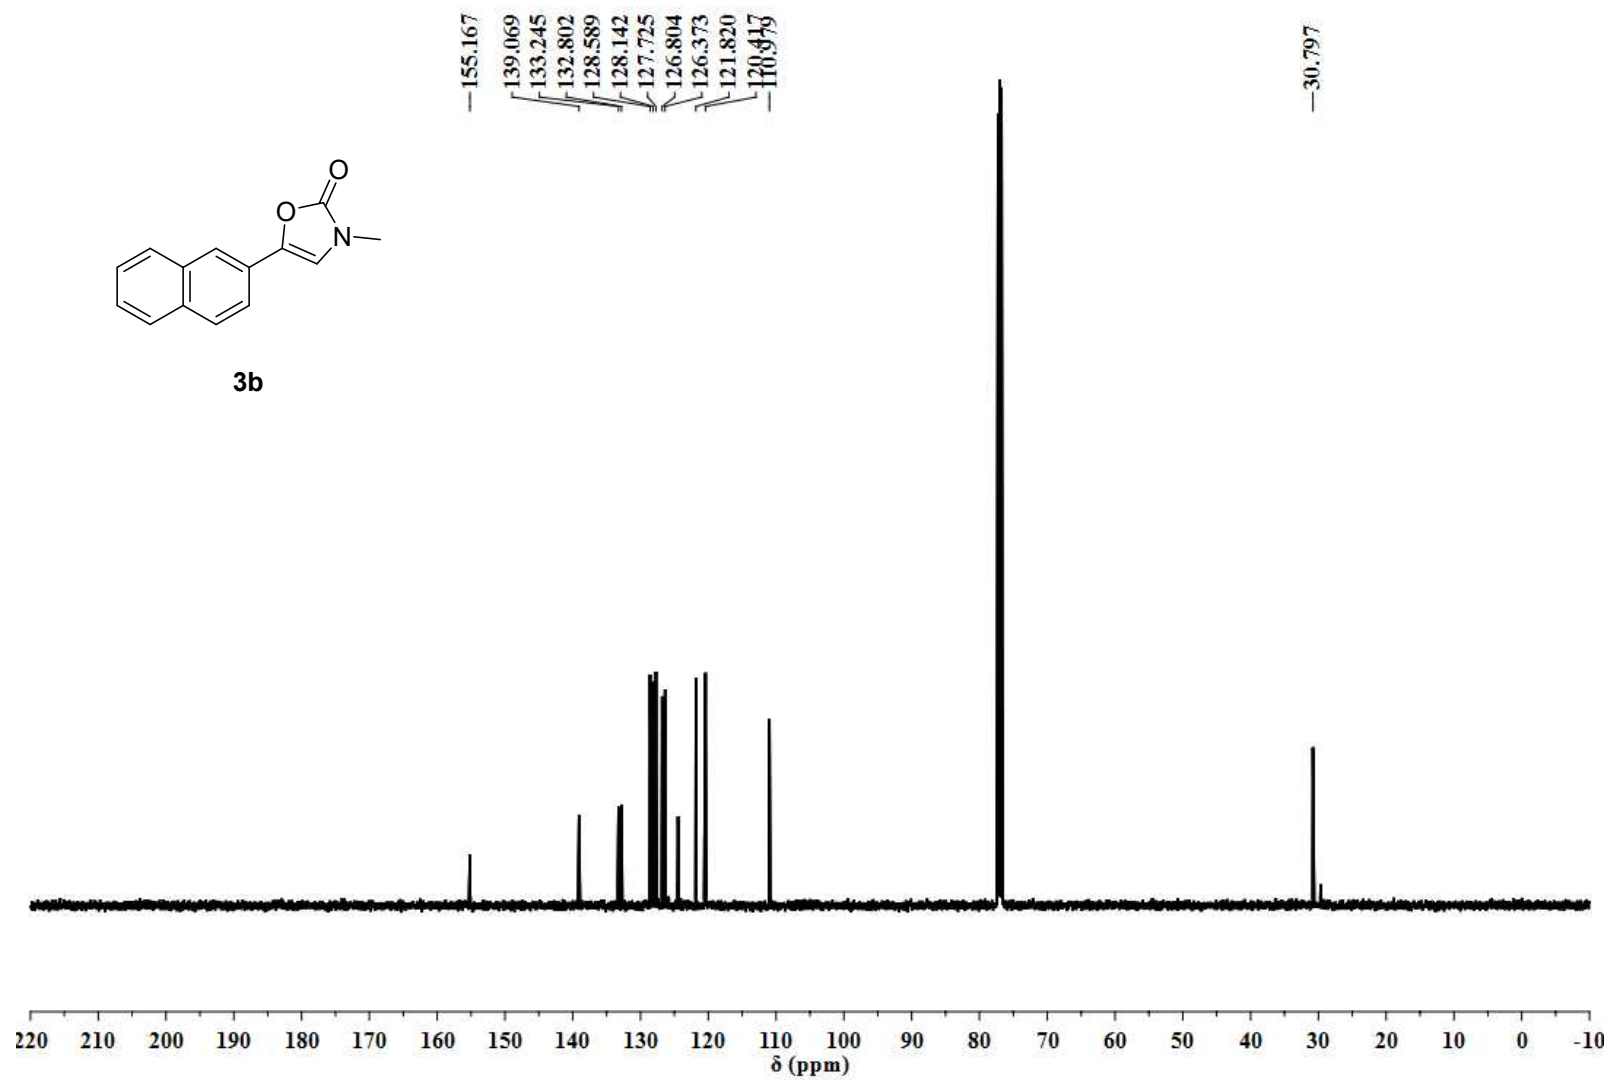

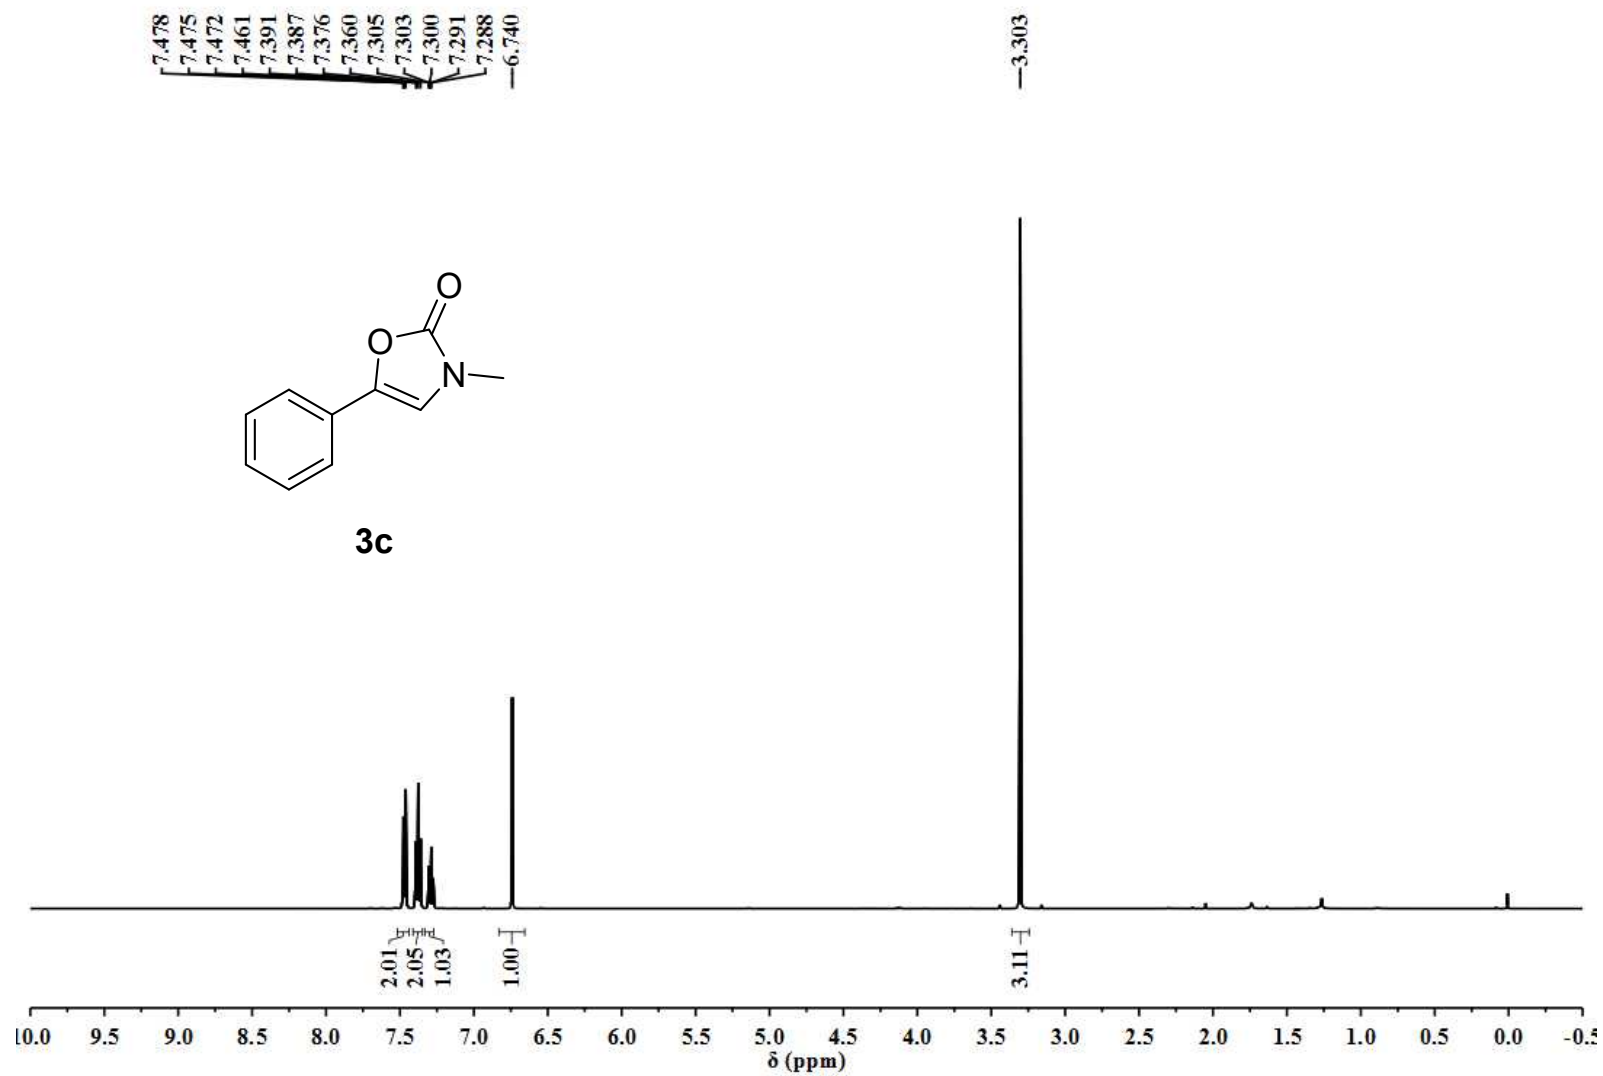

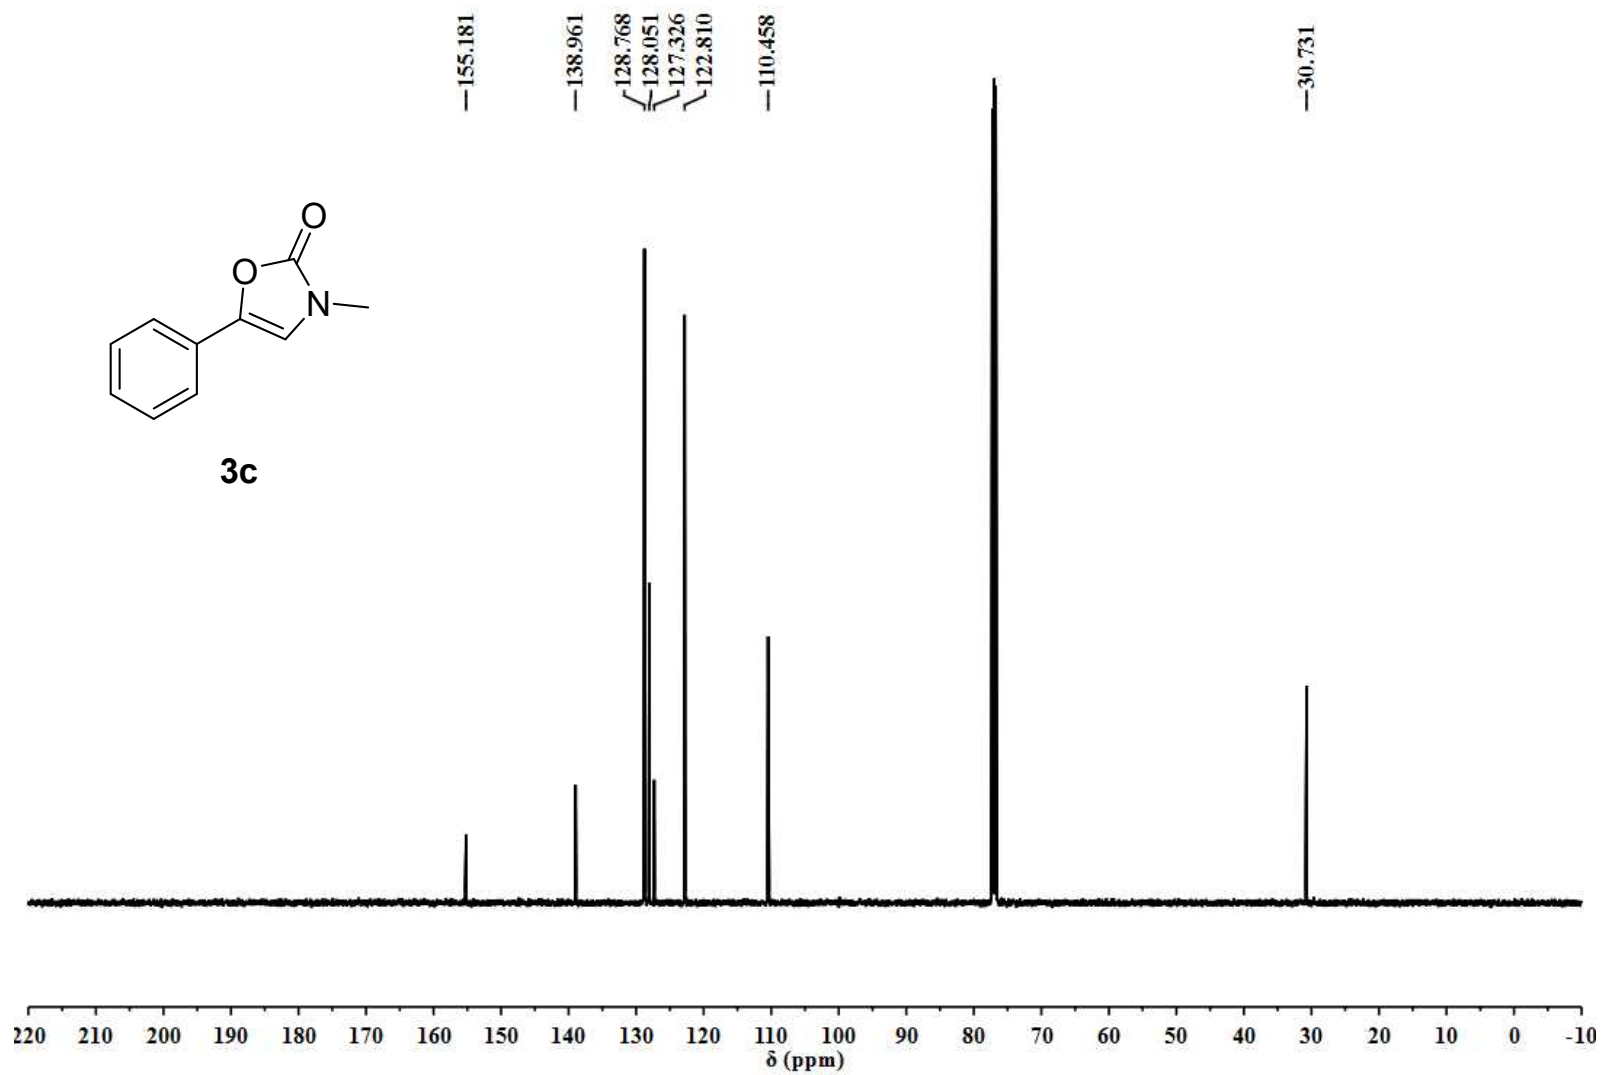

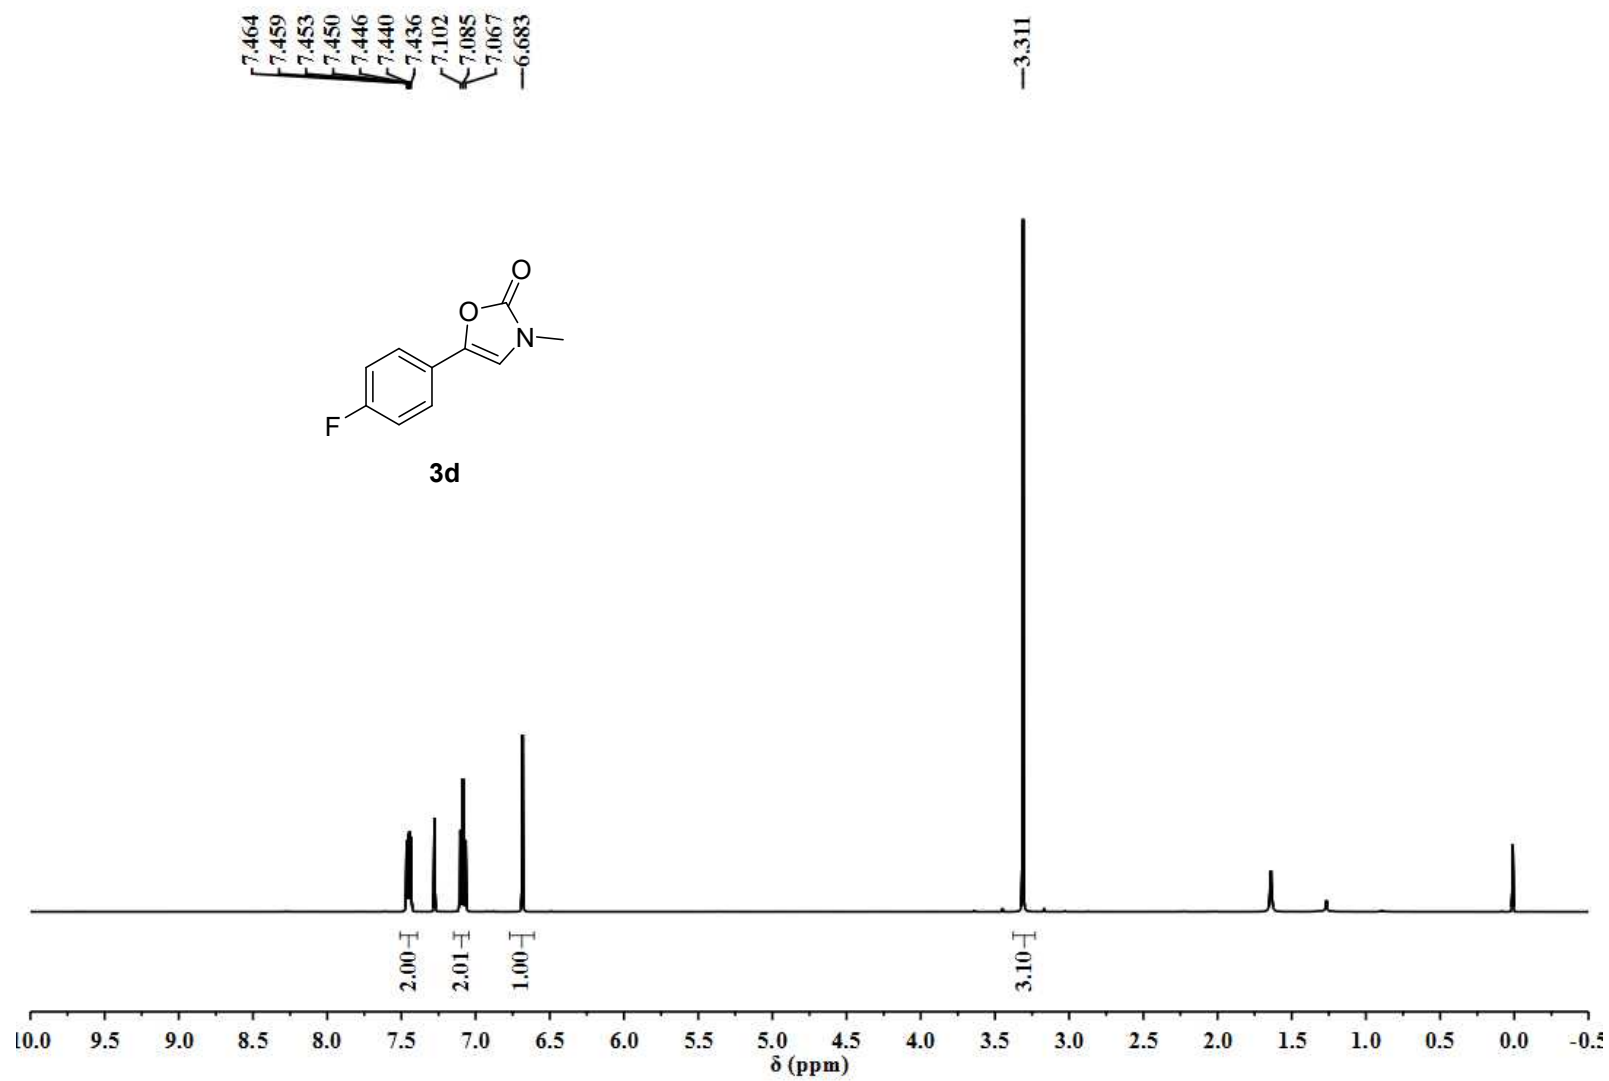

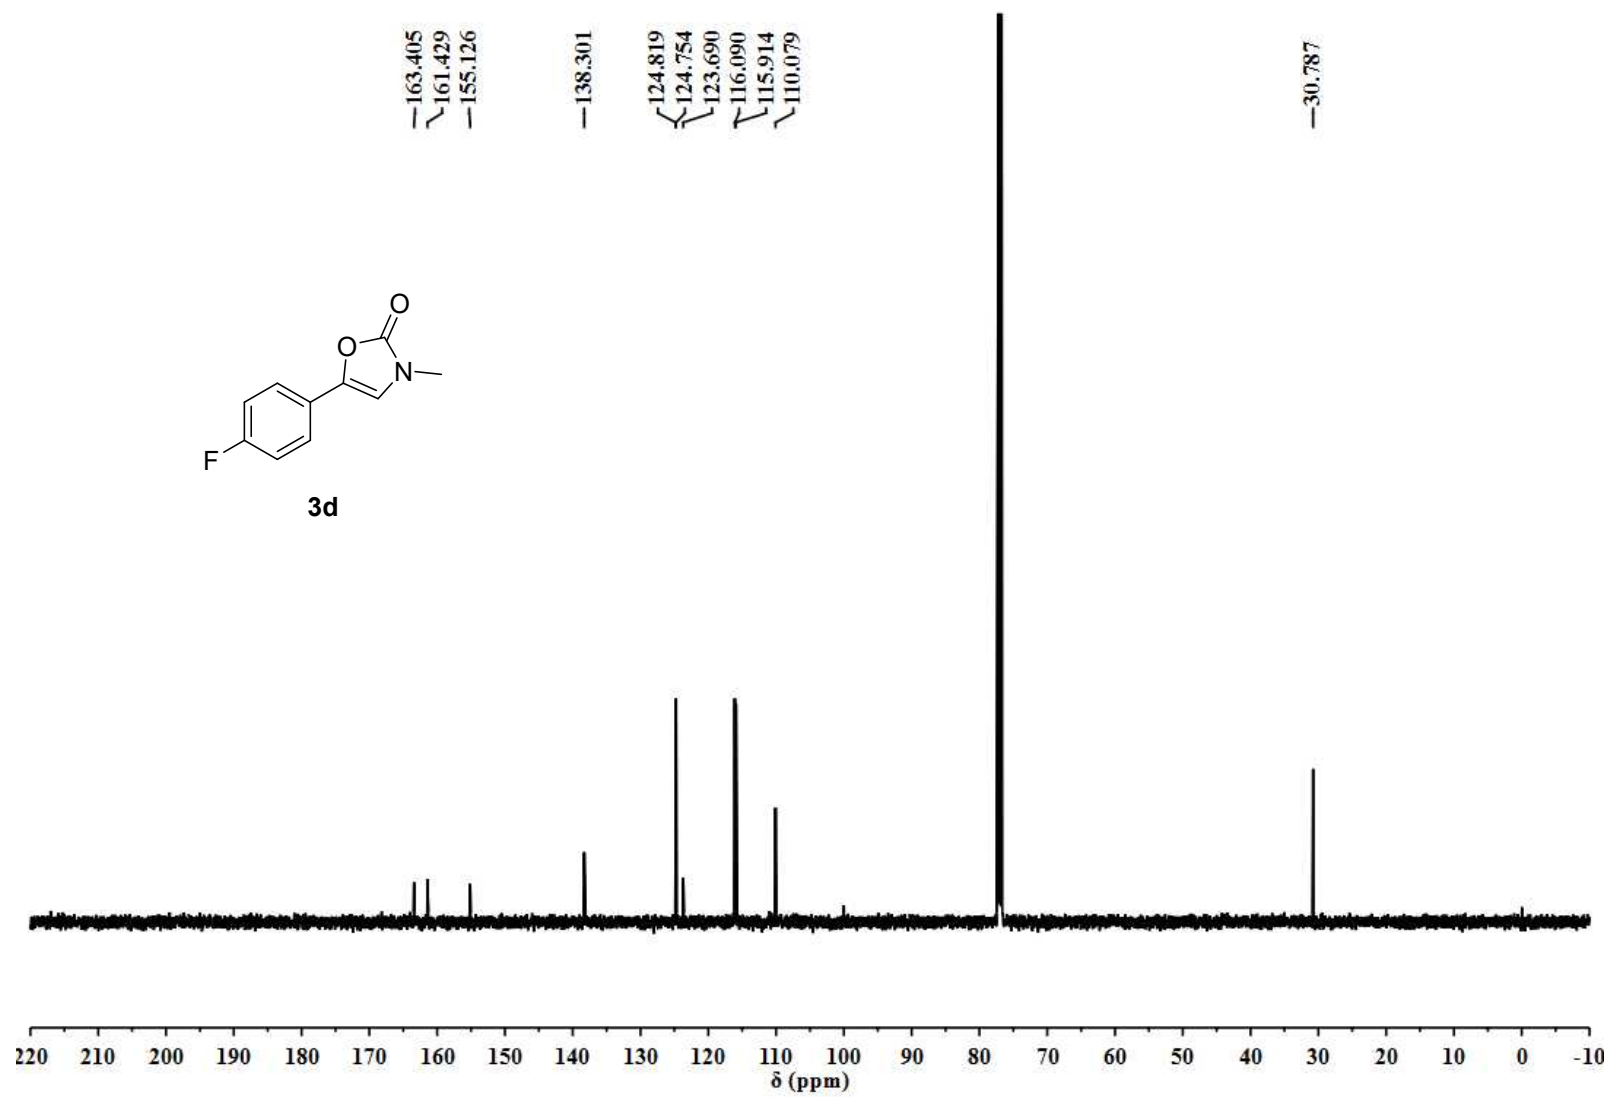

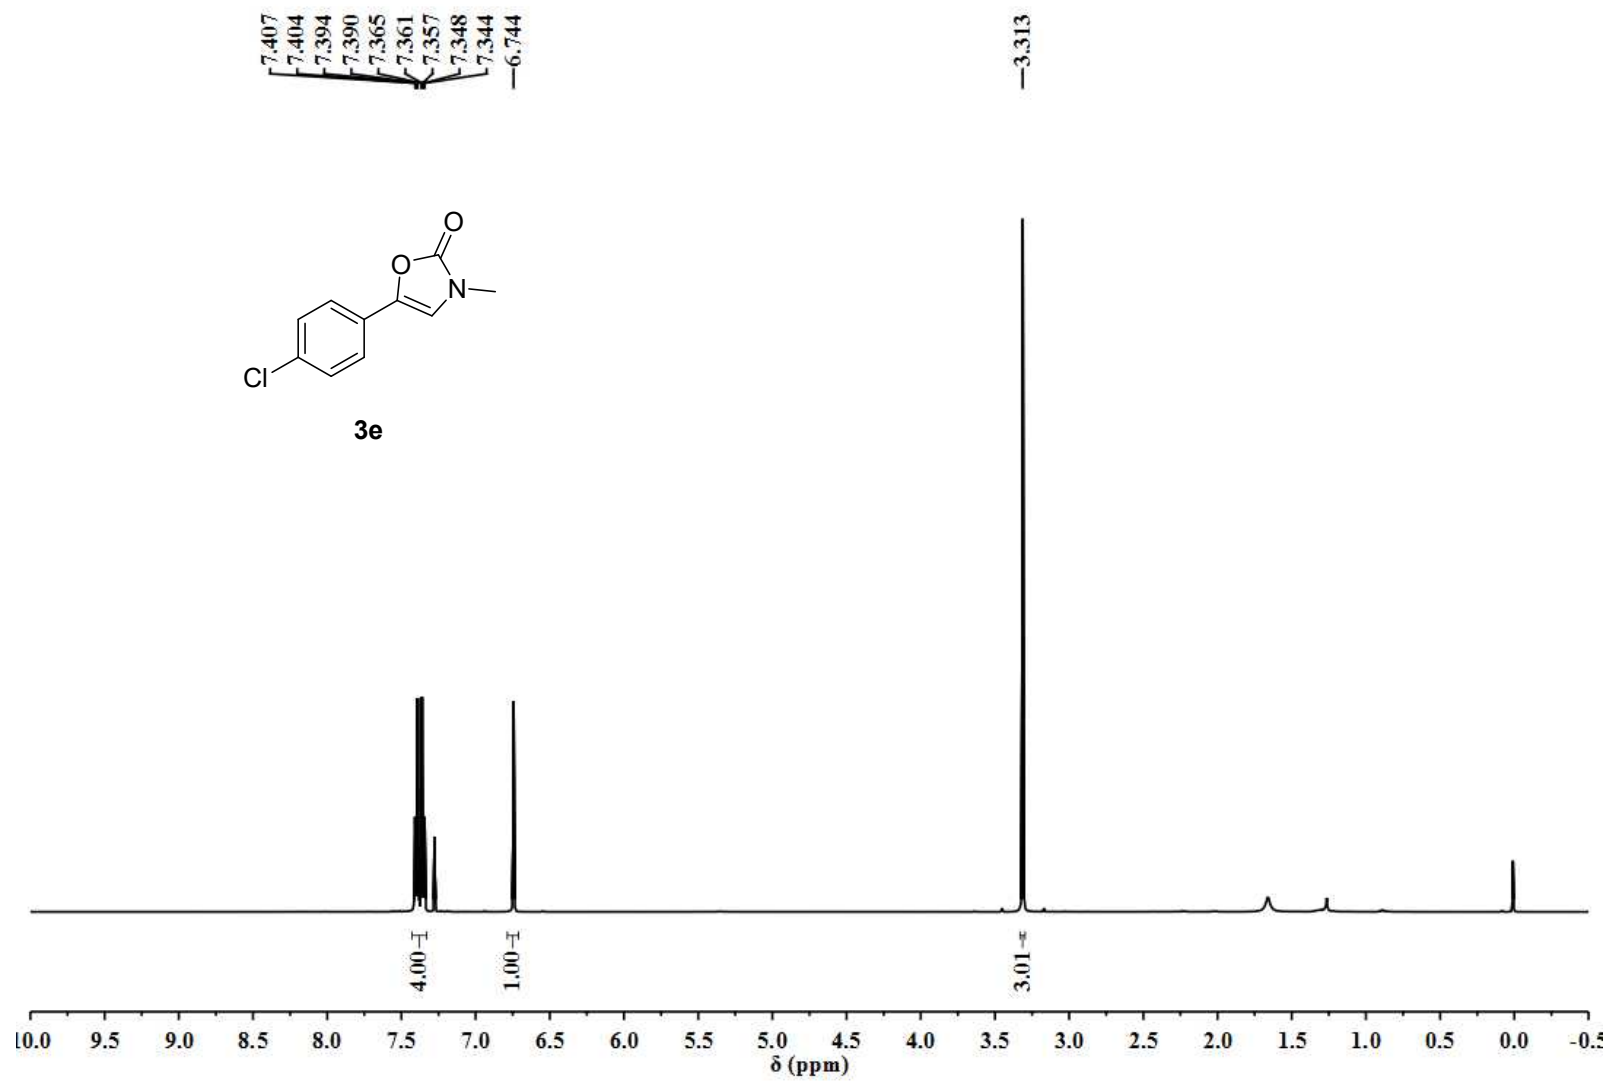

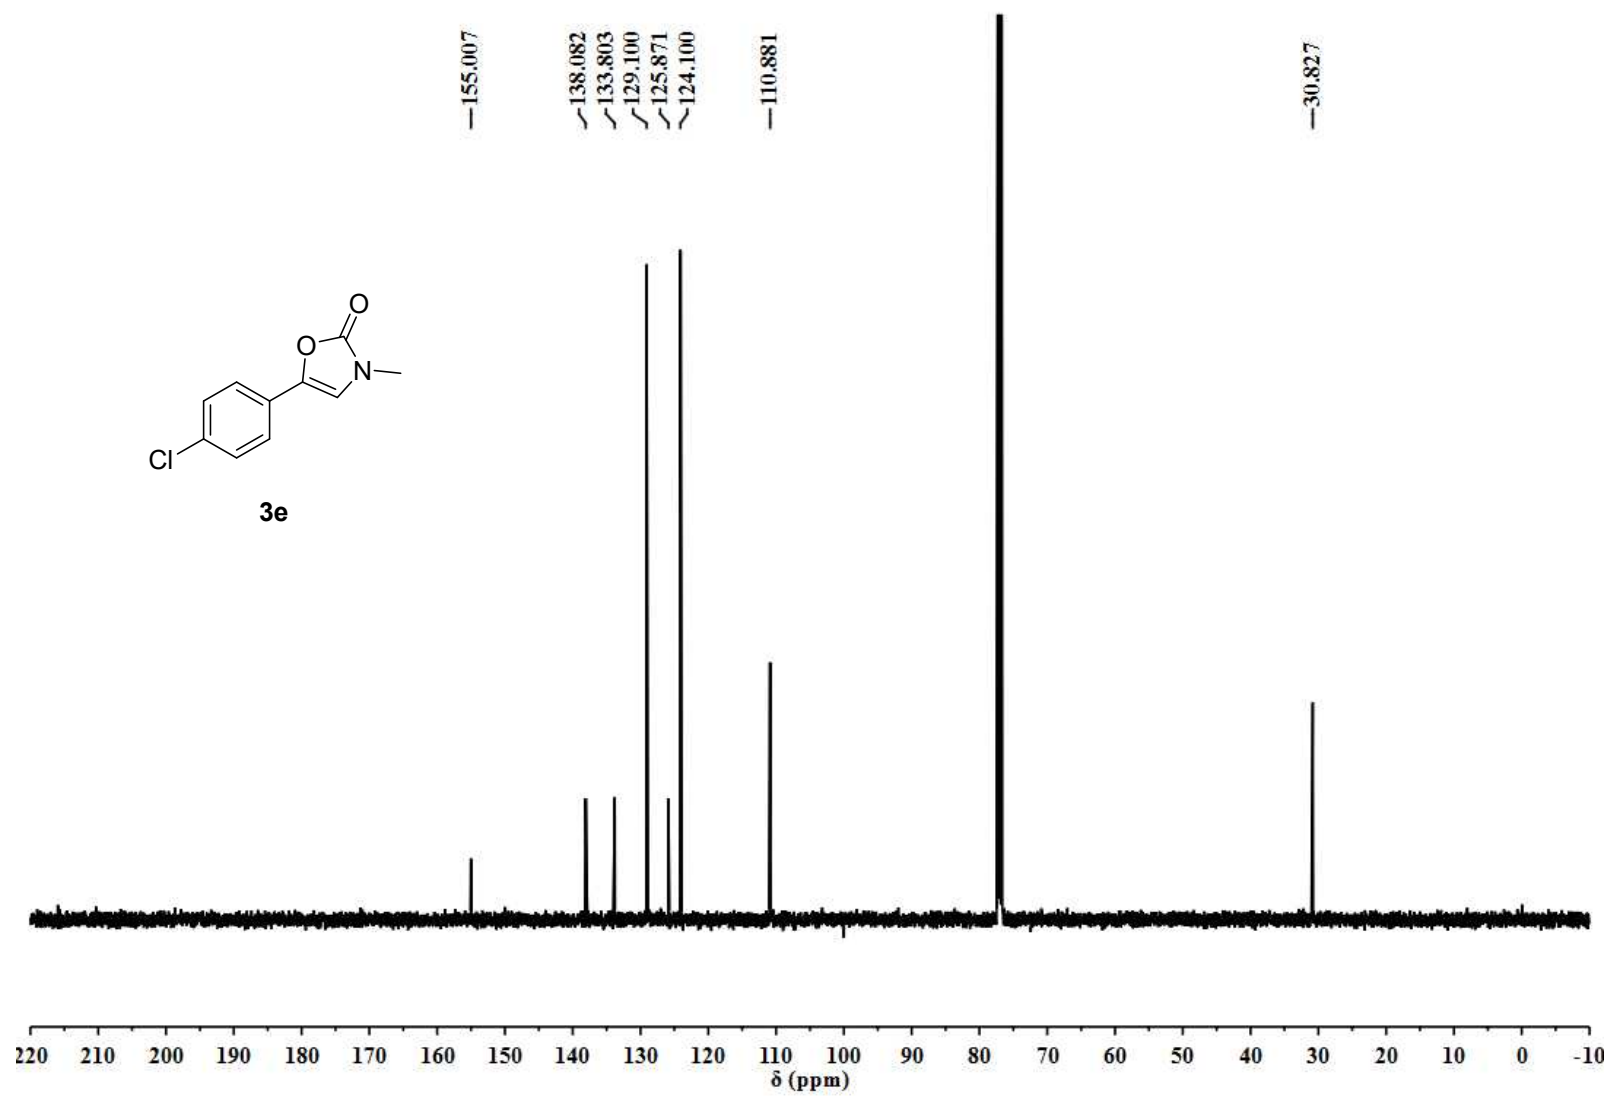

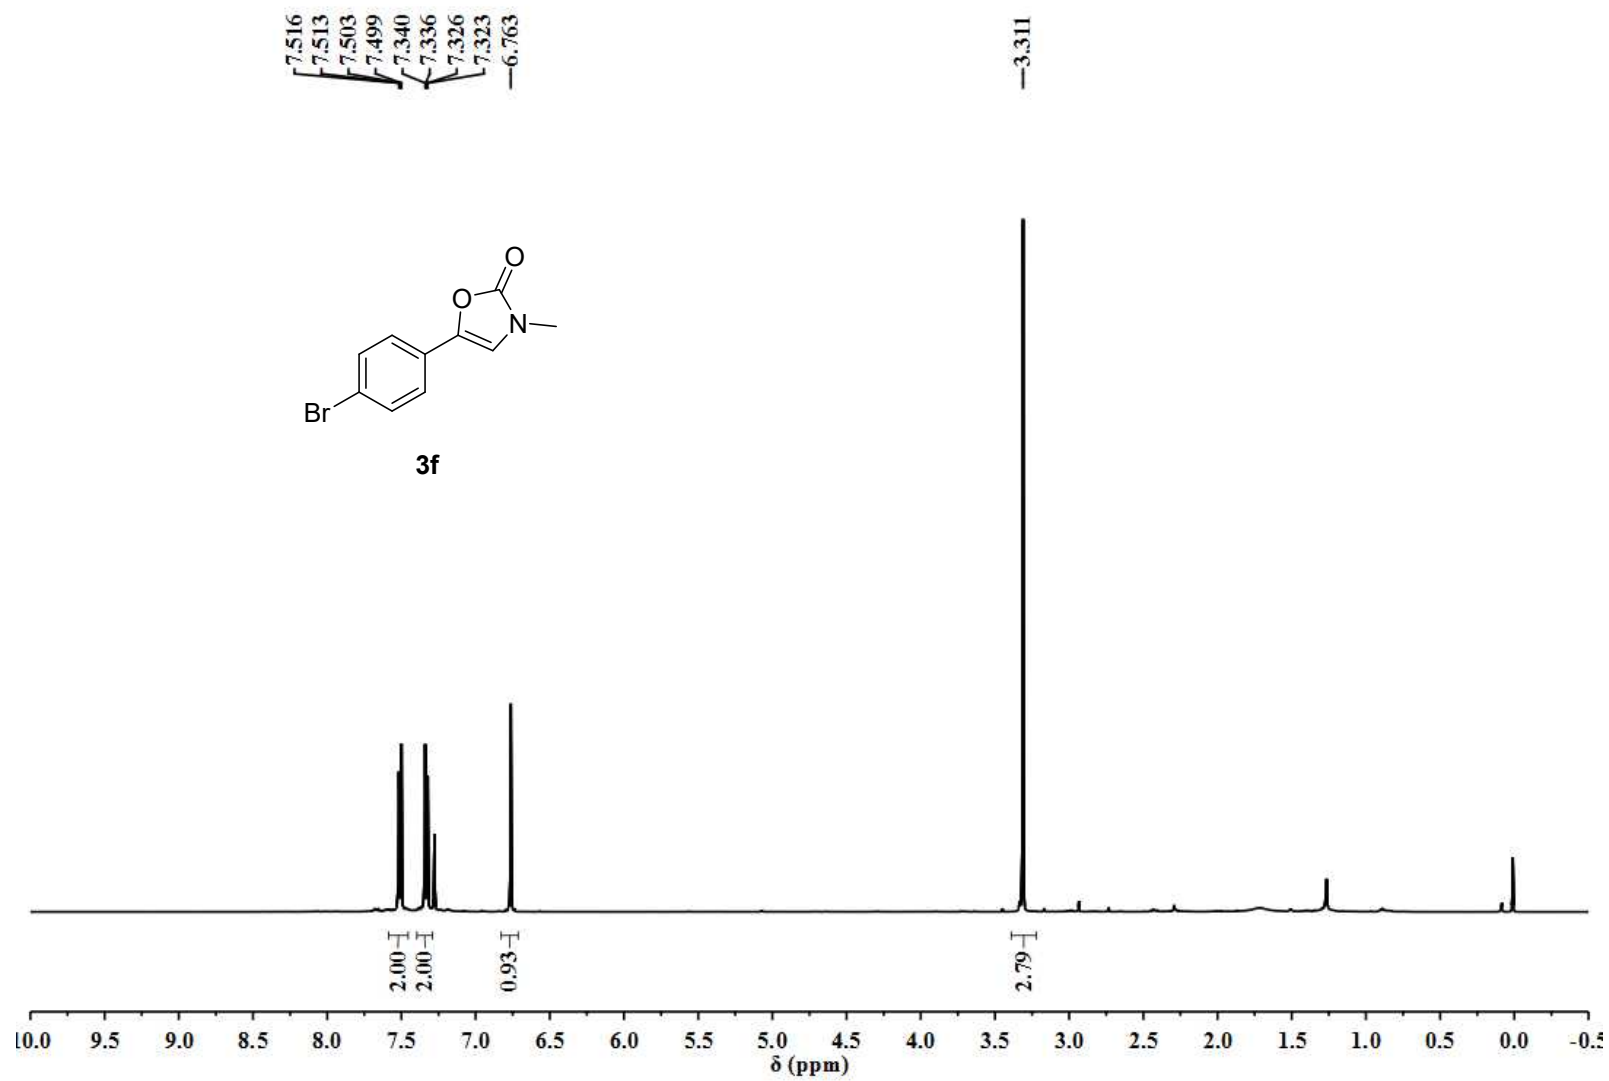

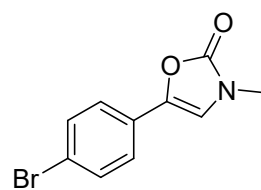

**3f**

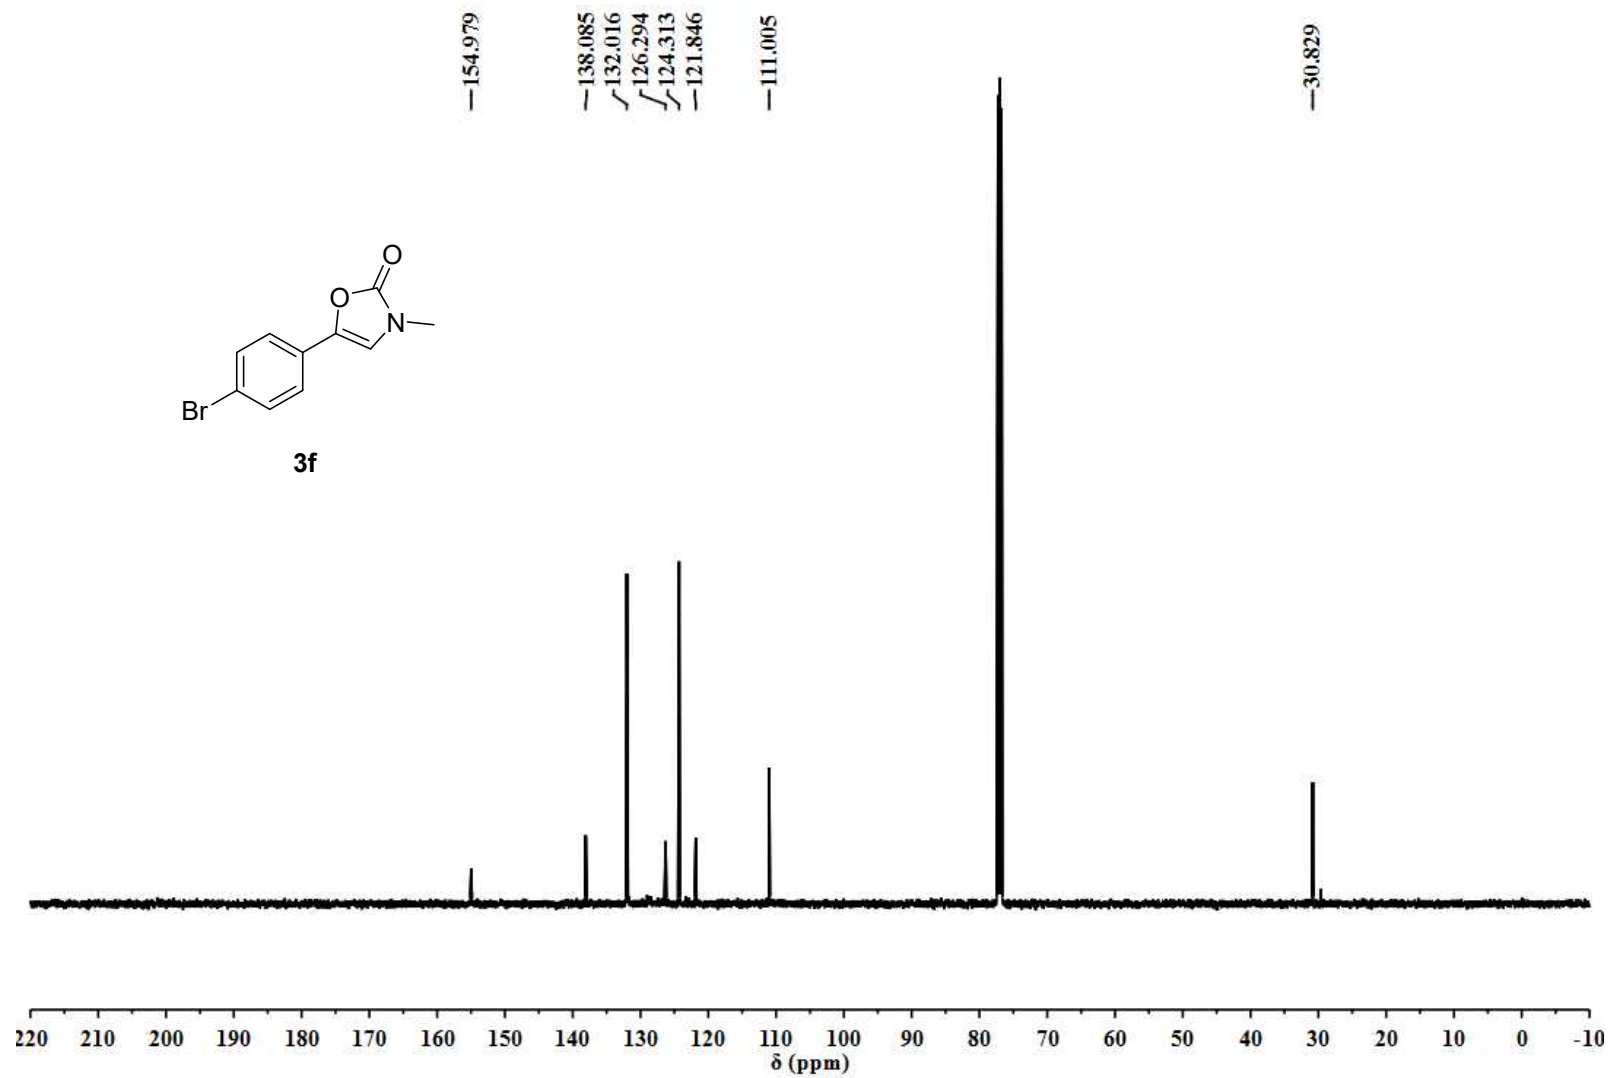

Supplement: d2cc03104c1.pdf [file d2cc03104c1.pdf]
